# Learning perturbation-inducible cell states of novel compounds from observability analysis of transcriptome dynamics

Aqib Hasnain<sup>\*1</sup>, Shara Balakrishnan<sup>2</sup>, Dennis M. Joshy<sup>1</sup>, Jen Smith<sup>3</sup>, Steven B. Haase<sup>4</sup>, and Enoch Yeung<sup>1</sup>

<sup>1</sup>Department of Mechanical Engineering, University of California Santa Barbara

<sup>2</sup>Department of Electrical and Computer Engineering, University of California Santa Barbara

<sup>3</sup>California Nanosystems Institute, University of California Santa Barbara

<sup>4</sup>Department of Biology, Duke University

## Abstract

1 A major challenge in biotechnology and biomanufacturing is  
2 the identification of a set of biomarkers for perturbations  
3 and metabolites of interest. Here, we develop a data-driven,  
4 transcriptome-wide approach to rank perturbation-inducible  
5 genes from time-series RNA sequencing data for the discovery  
6 of analyte-responsive promoters. This provides a set of biomark-  
7 ers that act as a proxy for the transcriptional state referred to  
8 as cell state. We construct low-dimensional models of gene ex-  
9 pression dynamics and rank genes by their ability to capture  
10 the perturbation-specific cell state using a novel observability  
11 analysis. Using this ranking, we extract 15 analyte-responsive  
12 promoters for the organophosphate malathion in the underuti-  
13 lized host organism *Pseudomonas fluorescens* SBW25. We de-  
14 velop synthetic genetic reporters from each analyte-responsive  
15 promoter and characterize their response to malathion. Further-  
16 more, we enhance malathion reporting through the aggregation  
17 of the response of individual reporters with a synthetic consor-  
18 tium approach, and we exemplify the library’s ability to be useful  
19 outside the lab by detecting malathion in the environment. The  
20 library of living malathion sensors can be optimized for use in  
21 environmental diagnostics while the developed machine learning  
22 tool can be applied to discover perturbation-inducible gene ex-  
23 pression systems in the compendium of host organisms.

## 24 Introduction

25 A major step in biomanufacturing and biotherapeutic processes is  
26 the optimization of production efficiency and therapeutic efficacy,  
27 respectively. Often, destructive or costly measurements such as  
28 high-performance liquid chromatography or next-generation se-  
29 quencing are used to observe the partial or total effect of a com-  
30 pound on known biomarkers that act as proxies for the cellular  
31 state. These biomarkers, though difficult to identify, once known,  
32 can be used as sensors to gauge the efficiency and efficacy of  
33 biotechnological processes across a wide array of experimental  
34 conditions.

35 Transcriptional genetic sensors are a class of biological com-  
36 ponents that control the activity of promoters [1] and have been  
37 used to construct whole-cell (living) biosensors [2–4]. A large

portion of transcriptional sensors rely on transcription factor-  
promoter pairs [5] and have been used in whole-cell biosensing  
for detection of heavy metals [6], pesticides and herbicides [7–9],  
waterborne pathogens [10], disease biomarkers [11–14], and many  
more applications discussed in [15]. Since microbes are found  
in virtually all terrestrial environments, one could imagine that  
there would be no shortage of transcriptional genetic sensors for  
novel sensing applications. However, given a novel sensing ap-  
plication for a target compound or perturbation, transcriptional  
genetic sensors are typically unknown *a priori*. Moreover, a com-  
plete methodology for discovering sensors and biomarkers for the  
target analyte in novel organisms does not yet exist.

The transcriptional activity of an organism can be measured  
through RNA sequencing (RNA-seq) to produce a snapshot of  
the bulk cell state subject to intrinsic and extrinsic perturbations.  
The typical approach for identifying upregulated and downregu-  
lated genes across experimental conditions is to apply differential  
expression analysis [16, 17]. A major pitfall with differential ex-  
pression analysis is its lack of statistical power when faced with  
a sparse number of biological replicates. That is to say that the  
false-positive rate increases drastically when only a small number  
of biological replicates are available [18] as is often the case due  
to the costliness of RNA-seq. A related issue arises in that one  
must sacrifice time points for biological replicates, reducing the  
fidelity of the dynamical process being studied. As most biolog-  
ical processes are dynamic, time-series profiles are essential for  
accurate modeling of these processes. Furthermore, differential  
expression analysis provides no information beyond which genes  
are upregulated/downregulated [19]. An analysis of expression  
dynamics provides a potential route to design a sensing scheme  
for a target analyte for which no single sensor exists.

A typical RNA-seq dataset contains hundreds to tens of thou-  
sands of genes; despite that, a subset of genes, often referred to  
as biomarkers, are typically sufficient for representing the under-  
lying biological variation in the dataset. This is explained by the  
fact that variations in many genes are not due to the biologi-  
cal process of interest [20] and that many genes have correlated  
expression levels [21]. Several algorithms to identify the mode-  
of-action for a compound have been developed from the perspec-  
tive of network reconstruction and have been used to reconstruct  
known regulatory networks and discover new ones [22–26]. Net-  
work reconstruction relies on steady-state data, is computationally  
expensive for high-dimensional systems, and the number of  
unknown parameters necessitate the collection of large, diverse

\*Please address correspondence to [aqib@ucsb.edu](mailto:aqib@ucsb.edu)

82 datasets. It is recommended to collect 1/10th the amount of  
83 samples as number of genes screened. To screen a model bacte-  
84 ria, e.g. *E. coli*, this amounts to roughly 400 RNA-seq samples;  
85 this can be prohibitively expensive. Conversely, we aim to devise  
86 a methodology that identifies biomarkers of interest from time-  
87 series data that is computationally inexpensive, and we validate  
88 our approach on limited datasets by closing the design-build-test  
89 loop.

90 The task of identifying a subset of the state (biomarkers) which  
91 recapitulate the entire state (transcriptome/cell state) and ex-  
92 plain the variations of interest is well studied in the field of dy-  
93 namics and controls in the form of optimal filtering and sensor  
94 placement [27,28]. In the context of dynamic transcriptional net-  
95 works, sensor placement is concerned with inferring the under-  
96 lying cell state based on minimal measurements; this introduces  
97 the concept of observability of a dynamical system [29]. The  
98 transcriptome is observable if it can be reconstructed from the  
99 subset of genes that have been measured. In other words, these  
100 genes *encode* the required information to predict the dynamics  
101 of the entire transcriptome. To the best of our knowledge, mea-  
102 sures of observability have not been applied to genetic networks  
103 to identify genetic sensors, biomarkers, or other key genes.

104 Due to the lack of DNA-binding information, transcriptional  
105 measurements of a population are not sufficient for the identi-  
106 fication of biosensors. Several techniques have been developed  
107 to analyze temporal correlations in time-series RNA-seq data in  
108 order to identify biomarkers of interest [30]. Dynamic cluster-  
109 ing tools have been developed which group genes according to  
110 co-expression patterns [31,32]. Dynamic gene regulatory net-  
111 work reconstruction (GRN) tools use time-series RNA-seq data  
112 to infer the functional interplay among genes when affected by  
113 a perturbation [33,34]. In both clustering and GRN, the ques-  
114 tion of selection of informative genes for downstream targeted  
115 gene profiling is not addressed. A primary advantage of observ-  
116 ability analysis is the use of temporal correlations to identify an  
117 optimal set of biomarkers that act as proxy for the perturbation-  
118 induced cell state. Genes which contribute more to observability  
119 are considered as informative genes or optimal biomarkers; these  
120 biomarkers can then be selected for targeted gene profiling.

121 Overall, a systematic approach for identifying genetic reporters  
122 from RNA-seq datasets is still an open and challenging issue. In  
123 this work, we develop a machine learning methodology to ex-  
124 tract numerous endogenous biomarkers for analytes of interest  
125 from time-series gene expression data (Figure 1). Our approach  
126 consists of three key steps, each of which is depicted in the middle  
127 panel of Figure 1. The first step adapts dynamic mode decom-  
128 position (DMD) [35–37] to learn the transcriptome dynamics from  
129 time-series RNA-seq data. Beyond the scope of sensor discovery,  
130 we show how the dynamic modes can be utilized to cluster genes  
131 by their temporal response. Secondly, we construct and solve  
132 an observability maximization problem which assigns weights to  
133 each gene [38,39]; highly ranked genes are those which can reca-  
134 pitulate the perturbation-induced cell state. Using this ranking,  
135 optimal biomarker genes may be selected. To ensure the ranking  
136 is identifying genes which can recapitulate the cell state, the final  
137 step is to measure how well a chosen subset of genes can recon-  
138 struct the cell state. To validate our proposed methodology, we  
139 use our method to generate a library of 15 synthetic genetic re-  
140 porters for the pesticide malathion [40–42], an organophosphate  
141 commonly used for insect control, in the bacterium *Pseudomonas*  
142 *fluorescens* SBW25. The transcriptional sensors play distinct bi-  
143 ological roles in their host and exhibit unique malathion response  
144 curves. Our method uses no prior knowledge of genes involved  
145 in malathion sensing or metabolism. Moreover, we use no data

source beyond RNA-seq, thereby providing a cost and computa-  
tionally efficient approach for biomarker identification.

## Results

**Induction of malathion elicits fast host response.** To start,  
we will first introduce the time-series RNA-seq dataset that we  
will use throughout this work. The transcriptional activation and  
repression of the soil microbe *Pseudomonas fluorescens* SBW25  
was induced by malathion at a molar concentration of 1.29  $\mu\text{M}$   
(425 ng/ $\mu\text{L}$ ). This concentration was chosen for the following two  
reasons: i) it is a moderate amount that can typically be found  
in streams and ground water after recent pesticide use based on  
studies done in the United States, Malaysia, China, Japan, and  
India [43,44], and ii) the characteristic concentration of a metabo-  
lite in bacteria is on the order of 0.1 – 10  $\mu\text{M}$  [45]. Malathion is  
an organophosphorus synthetic insecticide used mainly in agri-  
cultural settings [46] while SBW25 is a strain of bacteria that  
colonizes soil, water, and plant surface environments [47]. This  
makes the soil-dwelling strain a prime candidate for identification  
of transcriptional genetic reporters for the detection of malathion.

To enable rapid harvesting and instantaneous freezing of cell  
cultures, we made use of a custom-built vacuum manifold, en-  
abling fast arrest of transcriptional dynamics (Supplementary  
Figure 10 and Methods). Following malathion induction, cells  
were harvested at 10 minute intervals for 80 minutes, obtaining  
a total of 9 time points across two biological replicates that were  
sequenced. As the focus of our study is on identifying trends  
and correlations across time, we heavily favored time points in  
the trade-off between time points and biological replicates. To  
identify candidate biomarker genes for malathion induction and  
subsequently build synthetic transcriptional reporters, we also  
collected samples from a cell culture that was not induced with  
malathion. See the Methods section for further details on cell  
culturing and harvesting.

RNA sequencing (RNA-seq) provides a snapshot of the entire  
transcriptome i.e. the presence and quantity of RNA in a sample  
at a given moment in time. In this work, we examine the fold  
change response given by first normalizing the raw counts to ob-  
tain transcripts per million (TPM) [48] followed by calculating  
the fold change of the malathion condition with respect to the  
negative control,  $\mathbf{z} = (\mathbf{x}_M + 1)/(\mathbf{x}_C + 1)$ . The implication is that  
the fold change is the cell state,  $\mathbf{z}_k$  for some time point  $k$ , we are  
concerned with for discovery of genetic reporters. Of the nearly  
6000 known genes in the SBW25 genome, a large fraction of them  
were not expressed at significant levels. We filtered genes with  
TPM < 100 and specifically only 10% of or 624 genes are kept  
for modeling and analysis due to their relatively high abundance.

Given our goal of extracting salient analyte-responsive pro-  
moters from time-series gene expression data, we first model  
the dynamical process that is driven by the input of malathion  
on the SBW25 transcriptome. In the next section, we apply  
dynamic mode decomposition (DMD) to approximate the fold  
change response with a sparse collection of dynamic modes. We  
demonstrate how DMD can accurately describe gene expression  
dynamics by decomposing the time-series gene expression into  
temporally relevant patterns.

**Dynamic mode decomposition uncovers modes of host cell response.**

Dynamic mode decomposition (DMD) is a time-series dimen-  
sionality reduction algorithm that was developed in the fluid dy-  
namics community to extract coherent structures and reconstruct  
dynamical systems from high-dimensional data [35]. Recently,

146  
147  
148  
149  
150  
151  
152  
153  
154  
155  
156  
157  
158  
159  
160  
161  
162  
163  
164  
165  
166  
167  
168  
169  
170  
171  
172  
173  
174  
175  
176  
177  
178  
179  
180  
181  
182  
183  
184  
185  
186  
187  
188  
189  
190  
191  
192  
193  
194  
195  
196  
197  
198  
199  
200  
201  
202  
203  
204  
205  
206

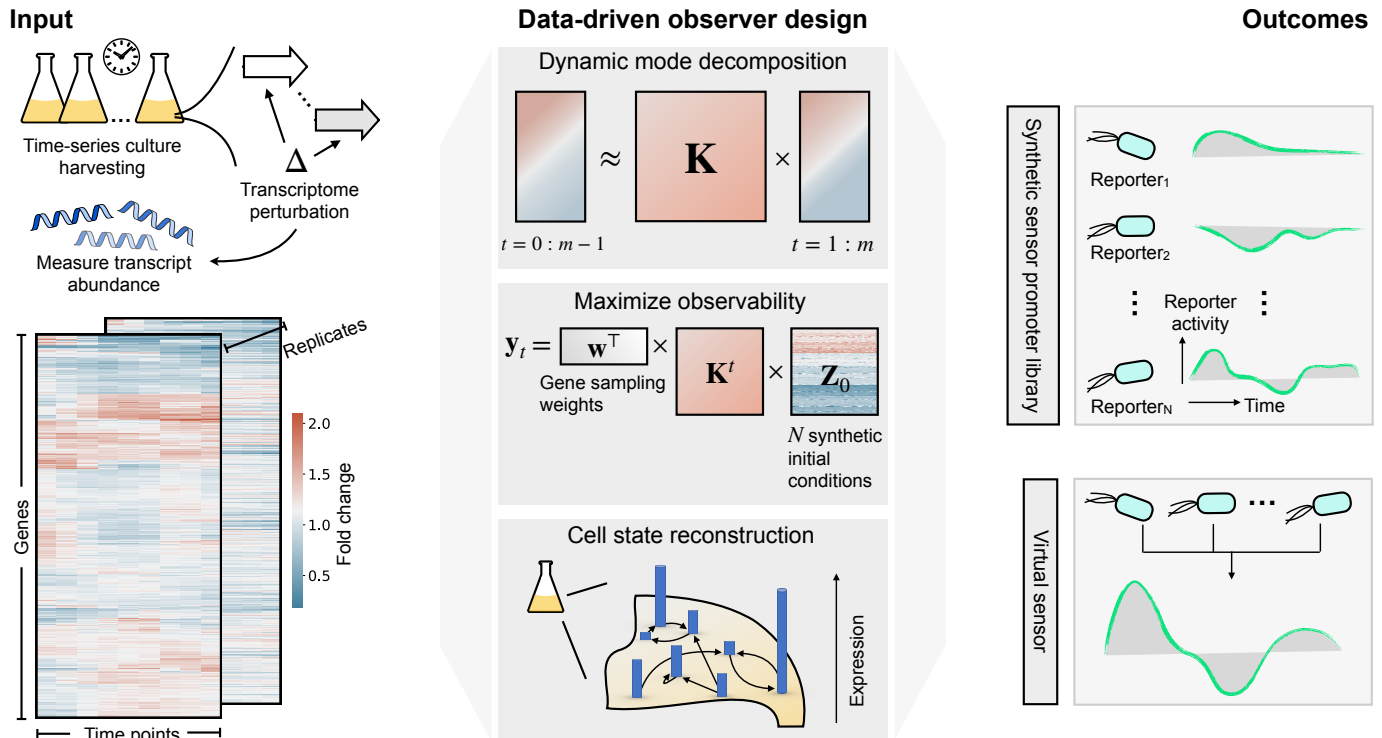

**Figure 1: Transcriptional genetic sensors underlying the response from environmental perturbations can be extracted using data-driven sensor placement.** Bulk RNA sequencing (RNA-seq) measures transcript abundance over time following transcriptome perturbations. Our method starts by applying dynamic mode decomposition (DMD) to the fold change response to discover dynamic modes which govern the evolution of the cell state. The dynamic modes are used to design a state observer (gene sampling weights) that maximize the observability of the transcriptome dynamics. Measurements from a subset of genes (*biomarker genes*) informed by the gene sampling weights are then used to reconstruct the cell state. Our method returns: 1) a dynamics matrix (or equivalently, a set of dynamic modes) describing how expression of gene  $i$  at time  $t$  is impacted by gene  $j$  and time  $t - 1$ . and 2) gene sampling weights signifying a gene’s contribution to the observability of the cell state. The outcome, demonstrated in this work, is a library of synthetic analyte-responsive promoters (genetic reporters) that are used to detect an analyte of interest. Since each genetic reporter has a unique response to the same perturbation, the library can be artificially fused to produce a purely virtual sensor for enhanced reporting.

several works have adapted and applied DMD to biological systems in various contexts [49–53], choosing DMD for its ability to i) reproduce dynamic data over traditionally static methods such as principal component [54] or independent component analysis [55] and ii) represent the dynamics of high-dimensional processes, in our case gene interaction networks, using only a relatively small number of modes.

To uncover the diverse modes of the host cell response to malathion induction, we performed (exact) DMD [37] on the transcriptomic dataset (see Methods for the details). Specifically, we perform exact DMD on the standardized fold change,  $\bar{z}$ , which decomposes a gene expression matrix (genes  $\times$  time points) into dynamic modes, eigenvalues, and amplitudes in the form

$$\hat{z}_t = \sum_{i=1}^r v_i \lambda_i^t b_i = \mathbf{V} \Lambda^t \mathbf{b} = \mathbf{V} \Lambda^t \mathbf{V}^{-1} \mathbf{z}_0 \quad (1)$$

where the rank  $r$  reconstruction of the cell state at time  $t$  is  $\hat{z}_t$ ,  $v_i$  are the learned dynamic modes,  $\lambda_i$ , are the learned eigenvalues, and  $b_i$  is the amplitude associated with each dynamic mode (often known as loading in the dimensionality reduction literature). From this we see that the transcriptome dynamics are modeled by a sum of damped, forced, and unforced sinusoidal behavior when the magnitude of the eigenvalues are less than one, greater than

one, or exactly equal to one, respectively. This decomposition constructs a low-dimensional linear model from high-dimensional time-series data; quantitative features of a nonlinear model are not captured in our model, e.g. multiple equilibria and chaos. If these nonlinear features are relevant to the system being studied, one can extend DMD to capture arbitrary nonlinearities, at the cost of requiring a larger number of samples to infer the parameters of the nonlinear function [56]. In this section we will describe how modeling the fold change response with DMD enables the identification of biologically relevant temporal patterns that are driven by the malathion perturbation.

We found that 10 dynamic modes provide an optimal balance between predictive accuracy and model instability. As the number of modes,  $r$ , is increased, we see monotonically increased predictive accuracy as measured by the coefficient of determination ( $R^2$ ) (Figure 2a (left)). However, the number of eigenvalues with magnitude greater than one, i.e. unstable modes, also increases with the number of modes (Supplementary Figure 3). As we will discuss in further detail in the next section and in the Methods, instabilities introduce challenges in observability analysis, therefore we aimed to minimize the presence of unstable modes in the learned dynamics. Although, since predictive accuracy is important, we could not altogether remove unstable modes.

Using the 10 dynamic modes, we obtain an accuracy of 0.92

228  
229  
230  
231  
232  
233  
234  
235  
236  
237  
238  
239  
240  
241  
242  
243  
244  
245  
246  
247  
248  
249  
250  
251

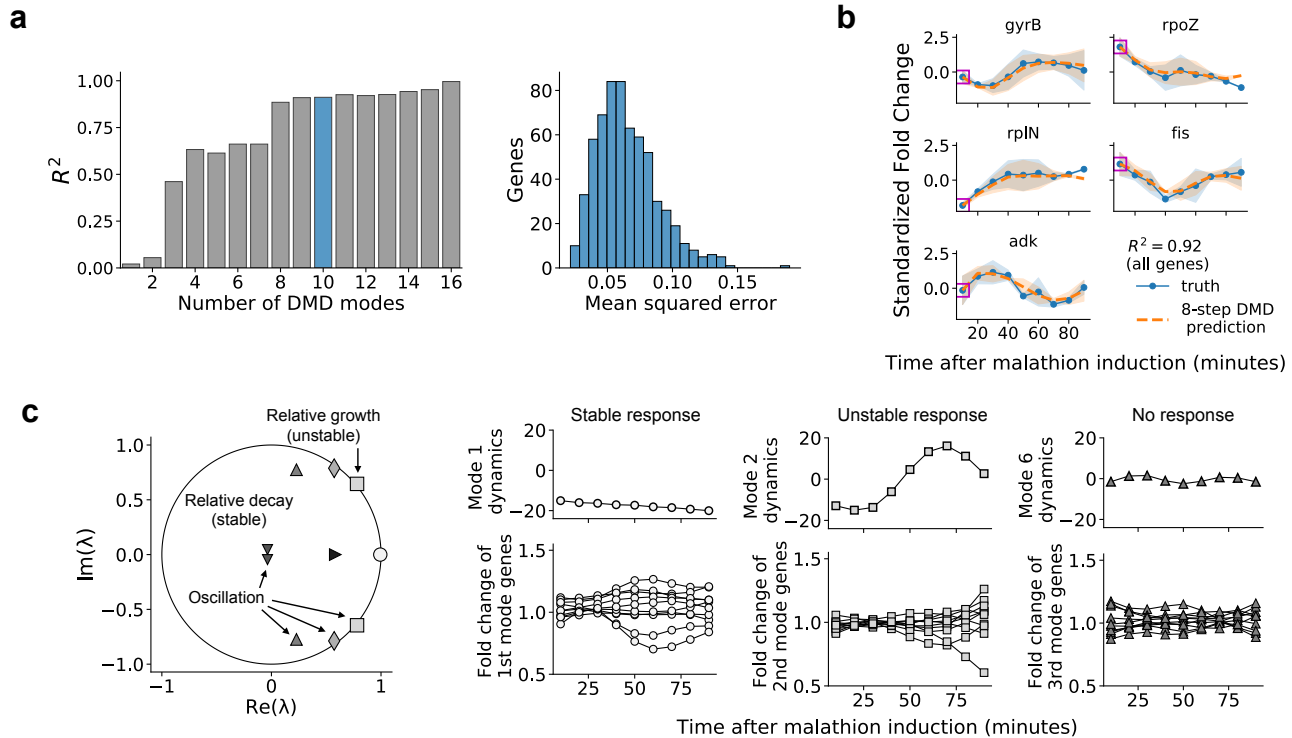

**Figure 2: Dynamic mode decomposition provides a predictive and interpretable model of gene expression dynamics.** (a) The coefficient of determination for the reconstruction is shown while varying number of DMD modes,  $r$  in (1) (left). 10 DMD modes are used to construct transcriptome dynamics in this work and the mean-squared error per gene is shown in the histogram on the right. (b) The eight-step prediction is visualized for five randomly selected genes in the transcriptomic dataset. The error bars represent the sample standard deviation across two biological replicates (blue solid curve) and across predictions (orange dashed curve). The coefficient of determination,  $R^2$ , for the eight-step prediction across all genes is computed to be 0.92. (c) The DMD spectrum reveals the growth, decay, and oscillation of each of the 10 dynamic modes that comprise the transcriptomic dataset. Each marker is an eigenvalue, and its diameter is proportional to the magnitude of the corresponding dynamic mode. Eigenvalues inside the unit circle correspond to decaying dynamics, eigenvalues with nonzero imaginary part correspond to oscillatory dynamics, and eigenvalues outside the unit circle correspond to growing dynamics. (d) The eigenvalue scaled amplitudes,  $\lambda_i^t b_i$ , of modes 1, 2, and 6 are visualized (upper) along with the 10 genes whose dynamics are most impacted by each of the modes (lower). The marker used for each mode indicates which eigenvalue it corresponds with in (c).

252 as measured across all genes. Figure 2b shows a set of 5 genes  
 253 and their temporal predictions using the DMD model. The predic-  
 254 tions are computed by feeding an initial condition feeding an  
 255 initial condition (the gene expression at time  $t = 0$ ) to the model  
 256 and then predicting all subsequent time points; for the nine time  
 257 points in the dataset. This amounts to two eight-step predictions  
 258 across the biological replicates. We emphasize that this is distinct  
 259 from measuring model accuracy by computing a one-step  
 260 prediction for each time point, which gives very little informa-  
 261 tion about the dynamic process that has been captured. The  
 262 low-dimensional model learned via DMD has accurately captured  
 263 the dynamics of the fold change response. To provide a founda-  
 264 tion for understanding when linear models can accurately repre-  
 265 sent fold change dynamics, we have shown, in the Supplementary  
 266 Information (Section 1.4), that the fold change response of two  
 267 linear systems, under stated assumptions, can be represented as  
 268 the solution of a linear system.

269 Our DMD analysis uncovers three distinct modal responses of  
 270 the malathion-perturbed transcriptome dynamics, namely stable,  
 271 oscillatory, and unstable responses. We classify each mode's  
 272 response type by the behavior of the associated eigenvalue. If the  
 273 associated eigenvalue has magnitude less than one or greater than

one, the mode is classified as stable and unstable, respectively.  
 If the eigenvalue also has a nonzero imaginary part, the mode  
 is classified as oscillatory as well. We have plotted the 10 DMD  
 eigenvalues relative to the unit circle in Figure 2c and labeled the  
 eigenvalues according to their type.

Stable modes are characterized by eigenvalues which are in-  
 side the unit circle. The magnitude of eigenvalues inside the unit  
 circle are strictly less than one and such a set of stable modes  
 indicate relative decay, that is to say that many genes have a tem-  
 poral response which only transiently deviate from a neutral fold  
 change (fold change equal to one for non-standardized trajec-  
 tories and fold change equal to zero for standardized trajectories).  
 Stable modes that have eigenvalues nearer to the unit circle are  
 capturing majorly uninhibited genes, while stable modes that are  
 nearer to the origin are capturing genes which converge to neu-  
 tral fold change exponentially, i.e. they exhibit strong relative  
 decay in their fold change.

Dynamic modes which are oscillatory are characterized by by  
 eigenvalues with nonzero imaginary part. Since gene expression  
 data is always real-valued, oscillatory modes will always come  
 in complex conjugate pairs. Each pair of complex-valued modes  
 then describes a fixed frequency of oscillation, and each gene's

274  
 275  
 276  
 277  
 278  
 279  
 280  
 281  
 282  
 283  
 284  
 285  
 286  
 287  
 288  
 289  
 290  
 291  
 292  
 293  
 294  
 295

dynamics can be reconstructed from one or more of these frequencies. The work of Sirovich found that the oscillatory modes obtained from DMD represent the genes underlying the yeast cell cycle, and the frequencies of oscillation were shown to provide an estimate of the cell cycle period that agrees with the literature [51].

Unstable modes are characterized by eigenvalues whose magnitude is larger than one. Many genes show temporal response that were either upregulated or downregulated. If the upregulation and downregulation is persistent throughout the gene's temporal profile or occurs at later times, there must be at least a single mode with eigenvalue outside the unit circle to be able to capture the underlying unstable response. This is because DMD is essentially learning a linear state-space representation of the fold change response and a linear system can only exhibit three types of limiting behaviors, i) convergence to the origin (stable), ii) periodic orbits, and iii) divergence to infinity (unstable). Therefore, for the reconstruction accuracy to be maximized, DMD eigenvalues with magnitude larger than one may be necessary. Such eigenvalues are marked with relative growth in Figure 2c. Though the two unstable eigenvalues are outside the unit circle, they are only marginally so, implying that unstable trajectories make up only a small portion of the transcriptomic response to malathion.

Despite the fact that most genes require a superposition of all of the dynamic modes for accurate reconstruction, we show that the modes can successfully group genes into interpretable clusters. Figure 2d (upper) shows the evolution of three dynamic modes ( $\lambda_i^t b_i$ ) representative of the transcriptomic dataset: modes 1, 2, and 6, corresponding to stable (modes 1 and 6) and unstable (mode 2) directions in gene space. The loading of mode  $j$  on gene  $i$ ,  $\mathbf{V}_{ij}$ , can be used to identify genes which are most influenced by the corresponding mode. In this way, we can use the DMD modes to cluster temporal responses in gene space, providing an interpretation to each DMD mode. The temporal gene clusters are shown in Figure 2d (lower).

The genes which are most influenced by mode 1 are those which diverge, in a stable manner, from a neutral fold change while the genes most influenced by mode 2 are those which diverge away from neutral fold change, capturing unstable trajectories. This is consistent with the eigenvalues of mode 1 and mode 2, which are stable and unstable, respectively. Finally, the genes most influenced by mode 6 are those with no clear trend present in their dynamics. In the next section, we will characterize those genes which contribute to cell state reconstruction and act as reporters for the malathion specific response. Relatedly, of the 20 genes that are most impacted by mode 1, seven of these genes contribute highly to cell state reconstruction (they are within the top 20 genes that contribute to the observability of the system).

The results of this section demonstrate that the set of 10 recovered DMD modes, eigenvalues, and amplitudes are indeed biologically relevant to the dynamics of the malathion response in the window of time that we have sampled the transcriptome. A key takeaway is that gene expression dynamics sampled at the resolution of minutes can be well approximated by a linear dynamical system, i.e. by a set of exponentially shrinking and growing modes. In what follows, we develop a sensor placement framework, relying on the learned linear dynamical system, to generate a ranked list of biomarker genes, i.e. subsets of genes which show variation to malathion induction and that can recapitulate the cell state.

**Sensor placement for cell state inference and extraction of genetic sensors.** Gene interaction networks are complex systems that induce systematic interdependencies between

genes. That is to say that the expression of most genes, if not all, depends on the expression of at least one more genes in the network. These interdependencies make it possible to measure only a subset of genes to infer the behavior of all other genes [57]. The approach taken in this work for evaluating whether a gene is an encoder of cell state information is to quantify how much each gene contributes to observability. To do this, we optimize a scalar measure of the observability gramian, a matrix which determines the amount of information that a set of sensors can encode about a system. Specifically, if we let the DMD reconstruction of the cell state be rewritten as  $\hat{\mathbf{z}}_t = \mathbf{V}\mathbf{A}\mathbf{V}^{-1}\mathbf{z}_{t-1} = \mathbf{K}\mathbf{z}_{t-1}$  and define an output equation

$$y_t = \mathbf{w}^\top \hat{\mathbf{z}}_t \quad (2)$$

where  $\mathbf{w}$  is a vector of weights, called sampling weights, that define the contribution of each gene to the output of the system, then we define the observability gramian [58] as

$$\mathcal{X}_o = \sum_{i=0}^{\infty} \mathbf{K}^{i\top} \mathbf{w}\mathbf{w}^\top \mathbf{K}^i. \quad (3)$$

In the context of transcriptome dynamics, given the DMD representation of the dynamics,  $\mathbf{K}$ , and a chosen gene sensor placement,  $\mathbf{w}$ , the gramian quantitatively describes i) to what degree cell states are observable and ii) which cell states cannot be observed at all. Increasing i) while decreasing ii) is the aim of many sensor placement techniques; furthermore, many scalar measures of the gramian have been proposed to determine the sensor placement (the weights  $\mathbf{w}$ ) which maximize the observability of the underlying dynamical system [59–61]. Many of the proposed approaches require explicit computation of the observability gramian, which can be computationally expensive for high-dimensional networks and intractable for unstable systems.

Here we develop an optimization framework which does not require explicit computation of the gramian. We do this by maximizing the *signal energy*,  $\sum_{i=0}^T y_i^2$ , of the underlying system. The resulting sensor placement problem is then defined to be an integer program in which the weights can only takes binary values 0 or 1. As high-dimensional integer programs are known to be computationally intractable, we employ several relaxations on the problem. The details of the full sensor placement problem and the relaxations are presented in the Supplementary Information (Section 1.2). Notably, we have approximated the full sensor placement problem to one in which an analytical solution always exists. This reduces the overall computational complexity, providing an approach which scales for a wide array of high-dimensional biological datasets collected from diverse host organisms.

The strategy we employ is to assign gene sampling weights,  $w_g$ , to each gene  $g$  through optimizing sensor placement, i.e. maximizing the signal energy. The significance of the magnitude of each weight is to rank each gene by their contribution to observability. The Methods section provides quantitative details on the relationship between observability, the observability gramian, and signal energy for sensor placement. In the Supplementary Information (Section 1.3), we provide a brief exposition of the observability maximization problem on simulated systems. We show how the sampling weights are affected by network topology and the number of time points.

By examining the learned gene sampling weights, we found that nearly all 624 modeled genes contribute, many insignificantly, to the observability of the system. Displayed in Figure 3a (upper) are the magnitude of gene sampling weights,  $\mathbf{w}$ , normalized by the standard deviation of the corresponding gene, that maximize the observability of the cell state. Weights that are

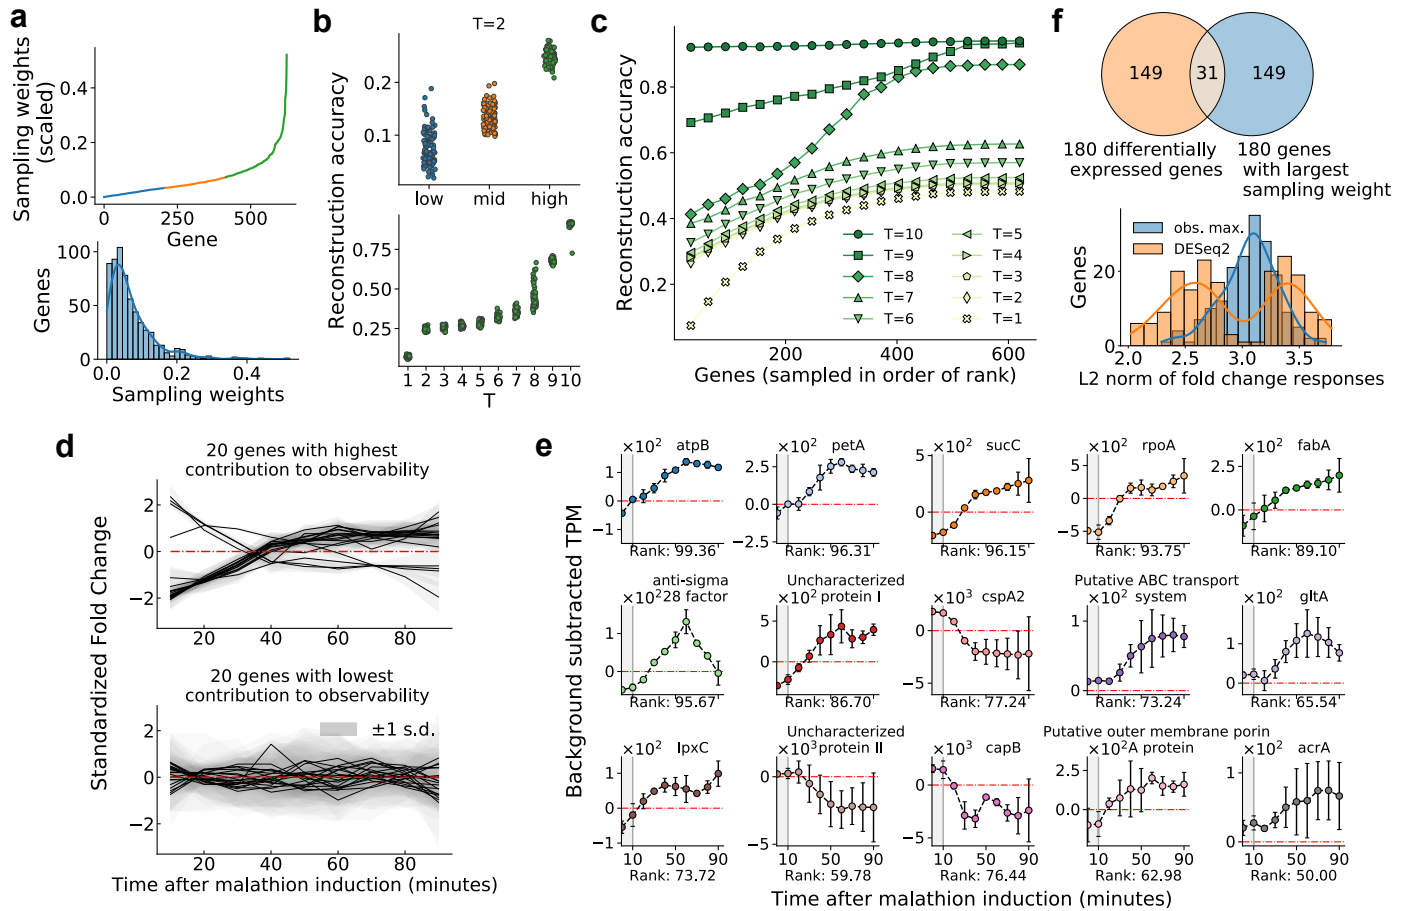

**Figure 3: Gene sampling weights which maximize observability provide a machine learned ranking for extraction of genetic sensing elements.** (a) The gene sampling weights,  $w$ , normalized by standard deviation of the corresponding gene, are sorted by magnitude and plotted in the upper panel. The weights are grouped into three categories: i) the third of genes with highest magnitude of sampling weights (plotted in green), ii) the third of genes with second highest magnitude of sampling weights (plotted in orange), and iii) the lower third that remains in blue). The lower panel is a histogram of the sampling weights and a kernel density estimate is superimposed. (b) The reconstruction accuracy ( $R^2$ ) between the true initial condition and the estimated initial condition when sampling 50 genes at random from each of the aforementioned groups for  $T = 2$  time points (top). The reconstruction accuracy was measured for a total of 100 runs each with a distinct set of 50 genes from each group. (Bottom) The reconstruction accuracy for the high group as a function of  $T$ . (c) Reconstruction accuracy between the estimated initial condition  $\hat{z}_0$  and the actual  $\bar{z}_0$  is plotted for number of sampled time points  $T = 1$  to  $T = 10$ . Each data point is obtained by sampling genes by rank (the amount sampled is given on the x-axis), generating outputs for  $T$  time points, and then estimating the initial condition. (d) The fold change response of the 20 genes which contribute most (top) and least (bottom) to the observability of the initial cell state are plotted. The error bars represent the sample standard deviation across two biological replicates. (e) The background subtracted TPM (malathion (TPM) – negative control (TPM)) of the 15 biomarker genes selected from the proposed ranking – by contribution to observability. The label on each x-axis indicates the percentage rank (out of 624 genes) of the gene, with respect to the gene sampling weights, with 100% corresponding to highest rank. The error bars indicate the sample standard deviation across two biological replicates. Malathion was introduced to the cultures after collecting the sample at 0 minutes, hence this sample is not used for modeling and cell state inference and this time window is shaded in gray. (f) A Venn diagram comparing 180 differentially expressed genes and genes with the largest sampling weights identified by our approach (top). The bottom panel shows a histogram of the L2 norm (Euclidean distance from the origin) of the fold change responses for the genes in the unique sets in the Venn diagram.

419 negative-valued (only magnitudes are shown here) correspond to  
 420 downregulated genes and weights that are positive-valued corre-  
 421 spond to genes that are upregulated. The higher the magnitude  
 422 of the gene sampling weight, the more important the gene is likely  
 423 to be for cell state reconstruction. The lower portion of Figure  
 424 3a shows the histogram of the sampling weights in  $w$ , display-  
 425 ing that there are fewer higher magnitude genes overall. To test  
 426 the notion that genes with higher weights contribute more to the  
 427 observability, the sampling weights are artificially grouped into

three categories, distinguishing genes which correspond to the  
 top (green), middle (orange), and lower (blue) third for magni-  
 tude of sampling weights. Each category contains 208 genes, and  
 next we show the gain in information that can be achieved when  
 sampling from one category over another.

To examine the contribution to observability provided by genes  
 in each of the categories, we perform Monte Carlo simulations to  
 estimate the expected predictability of the initial cell state. From  
 output measurements,  $y_t$  ( $t = 1, 2, \dots, T$ ), that are generated by

428  
 429  
 430  
 431  
 432  
 433  
 434  
 435  
 436

randomly sampling 50 genes from a specified category (low, mid, high), the initial cell state,  $\bar{\mathbf{z}}_0$ , is estimated and the coefficient of determination ( $R^2$ ) between the actual and estimated cell state is computed as a measure of reconstruction accuracy. The simulation is repeated 100 times for each category and the resulting distributions over the random gene sets are plotted in Figure 3b. In the top panel, we can see that when  $T = 2$  (2 time points are used for reconstruction), predictability of the cell state is highest for the genes in the high category. Specifically, the reconstruction accuracy is three and two times larger in the high category than in the low and mid categories, respectively. In the lower panel we show how the reconstruction accuracy changes with changing the number of time points,  $T$ , for the high group of genes. We find that that reconstruction accuracy monotonically increases with  $T$ , however we point out that due to not being able to accurately capture network topology from sparse data, the results gathered at large  $T$  ( $T \geq 6$ ) do not show significant differences between the groups. This is due to the fully-connected topology of the state-space model we have learned using DMD. The interdependencies between genes (though mostly miniscule) are amplified exponentially over time, resulting in highly observable genes transferring information to lowly observable genes. Hence, it may not be possible to distinguish reconstruction accuracy of the groups of genes when evaluated at large times.

Measuring fewer genes for many time points leads to higher cell state reconstruction accuracy than if many genes are measured for fewer time points. This result is demonstrated in Figure 3c which shows how the cell state reconstruction accuracy is affected by two parameters, the number of sampled genes and the number of time points,  $T$ , that the genes are measured for. The reconstruction accuracy is again the coefficient of determination,  $R^2$ , between the reconstructed initial condition,  $\hat{\mathbf{z}}_0$ , and the actual initial condition  $\bar{\mathbf{z}}_0$ . For each  $T$ , the first data point is generated by sampling only the five genes with the highest sampling weights for  $T$  time points. The complete cell state is then inferred from these measurements alone and the coefficient of determination between the estimated and actual cell state can be computed (see Methods for a detailed description of the cell state inference algorithm). To compute subsequent data points, the next five genes with maximum sampling weights are simultaneously measured along with previously measured genes, and the cell state is reconstructed again. For the response of SBW25 to malathion, we find that even if only the top five genes are measured but for  $T = 10$  time points, the cell state reconstruction is still more accurate than if all genes with nonzero sampling weights are measured with  $T \leq 8$  time points. Specifically, the reconstruction accuracy with 5 genes sampled for  $T = 10$  time points is nearly 0.9 while the reconstruction accuracy with 600 genes sampled for  $T = 8$  time points is slightly greater than 0.8. This signifies that the ability to study the dynamics of a few genes with fine temporal resolution can greatly increase the knowledge of the entire system.

Failure to reconstruct the initial cell state is a result of two mechanisms. The first is that we only have access to the DMD representation of the dynamics, not the true dynamics. Therefore, any output measurements generated using the DMD model will certainly incur an error with respect to the actual dynamics. As error accumulates each time-step, it is possible for the reconstruction accuracy to decrease with increasing time points. The second hindrance for full cell state reconstruction is when many genes contain redundant information. If two genes have nearly identical gene expression profiles, adding the second gene to the set of measurements provides no useful information for the cell state inference. This may explain the asymptotic behavior

of the curves in Figure 3c. There are only relatively few distinct dynamic profiles present in the transcriptomic dataset, and once all distinct profiles have been sampled, no further improvement in reconstruction can occur. This explanation is consistent with the fact that many genes co-express [21] and this fact has even been used to reconstruct dynamic gene regulatory networks [62].

The gene sampling weights,  $\mathbf{w}$ , provide a machine learned ranking for discovering genetic biomarkers. Recall that the fold change was taken to be the state of the system when performing DMD. In so doing, we show that the observability-based ranking can also predict genes that respond to malathion in a condition specific manner. Specifically, genes which contribute highly to the observability of the system are genes which show prolonged dysregulation in the presence of malathion. This is visualized in Figure 3d where in the top panel the 20 genes which have the largest sampling weights are plotted. Each of the 20 genes show dysregulation from the neutral fold change (0) that is persistent over the course of the time-series. Conversely, the 20 genes with lowest sampling weights show no clear trend or signal of dysregulation. Significant correlations are present among the genes which contribute highly to observability. This is due to the fact that we have solved a relaxed version of the sensor placement problem that allows each gene to have nonzero weight towards maximizing the observability. In the unrelaxed problem, only a pre-defined number of genes can have nonzero weight and therefore to capture all the distinct temporal profiles in the transcriptomic dataset, selected genes are likely to be uncorrelated.

To show that observability-ranked genes can act as genetic reporters for malathion, we selected a set of 15 genes with which to construct transcriptional reporters from. The 15 time-series profiles generated via RNA-seq are visualized in Figure 3e in the form of  $\text{TPM}_{\text{malathion}} - \text{TPM}_{\text{control}}$ . Because of the significant correlations among the top ranked genes, we reutilized the Monte Carlo strategy to select the set of 15 genes with which to build a library from. Another suitable approach would be to select genes from the top of the ranking and remove any genes which are correlated until only 15 genes remain. To select this set of 15, the genes were first ranked (out of 624 genes) based on their gene sampling weights. Then a randomly chosen subset of 15 genes from the top half of the ranking were used to reconstruct the cell state. The subset of 15 which produced the highest cell state reconstruction accuracy, i.e. which maximize the observability of the cell state, were chosen as the biomarker genes with which to design genetic reporters from. Specifically, the observability maximizing set of 15 genes shown in Figure 3e achieve a cell state reconstruction accuracy of 0.67 when outputs are generated using  $T = 8$  time points.

We find that the overall correlation among the 15 selected genes is far less than the correlation among the 15 genes with highest sampling weights. To measure the correlation between gene sets, we use the following metric

$$\|\mathbf{1}_{k \times k} - R^{\text{abs}}\|_F \quad (4)$$

where  $\mathbf{1}_{k \times k}$  is the matrix of  $k \times k$  ones and  $R^{\text{abs}}$  is the element-wise absolute value Pearson correlation coefficient matrix of the  $k$  selected genes. When the metric approaches zero, the overall correlation between the selected gene set is large. Conversely, when the metric approaches infinity, the overall correlation between the selected gene set is small. We find for the selected 15 (shown in Figure 3e), metric is 7.0 and for the 15 genes with maximum sampling weights, the metric is 2.9

Of the 15 selected biomarker genes, 12 appear to be activated by induction of malathion while the remaining 3 appear to be repressed. Table 1 lists the molecular functions of each of the se-

lected genes based on their Gene Ontology (GO) annotations [63]. Where gene names are not available, we have used protein annotations to denote those genes. It is shown that the set of molecular functions are diverse, indicating that malathion drives the activation and repression of disparate biological processes. When synthesized into genetic reporters, as we will show in the next section, these biomarker genes exhibit distinct dynamic range, sensitivity, and time-scales in response to malathion.

Comparing our approach to differential expression analysis, we find that our results are largely in complement to each other. To start, we used DESeq2 [16] and found five significantly differentially expressed genes after multiple-testing correction with the Benjamini-Hochberg procedure. The fold changes of the five genes lie in the range 0.52 - 1.54 and the control subtracted temporal responses are visualized in Supplementary Figure 9.

Next, we used non-corrected p-values and a significance threshold of 0.05 to call a gene differentially expressed. This identified a total of 180 differentially expressed genes (however they cannot be called significant) after induction of malathion. Comparing these genes to the genes with 180 largest sampling weights, we find that there are 31 genes are in common (Figure 3f, upper). To show the distinction between the genes identified between the two approaches, we visualize the histogram of the L2 norm of each gene's fold change response (Figure 3f, lower). We see that our approach, labeled, obs. max., identified genes with fold change response centered around 3.0, while DESeq2 identifies two clusters of genes centered around 3.2 and 2.5.

It is interesting to note that our approach identifies genes almost exactly where DESeq2 identifies no genes to be differentially expressed. Overall, differential expression analysis is not always suitable for a dataset with low number of biological replicates and can result in very few genes being called as differentially expressed, as was our case. In contrast, our approach, as we show in the next section, identifies malathion responsive genes that differential expression analysis was not able to identify.

### Design and characterization of fluorescent malathion sensors.

To validate the transcriptome-wide analysis for identification of analyte-responsive promoters, the putative promoters of the candidate sensor genes were cloned into a reporter plasmid containing a reporter gene encoding *sfGFP* (superfolder green fluorescent protein) and transformed into the host SBW25 (Figure 4a). The reporter strains are cloned in an unpooled format, allowing for malathion response curves to be generated at the reporter level as opposed to a pooled study which would incur additional sequencing costs for individual strain isolation.

Malathion reporters are characterized in the laboratory in an environmentally relevant way by sourcing malathion from the commonly used commercial insecticide called Spectracide (containing 50% malathion). First, it was verified that the response of the reporters to analytical standard malathion was consistent with the response when induced with Spectracide. That is to say that if the reporter was upregulated (downregulated) in response to malathion, it was also upregulated (downregulated) in response to Spectracide. Furthermore, the culture media containing nutrients and Spectracide that the reporter strains were cultured in was analyzed with mass spectrometry and compared to the mass spectrum of analytical standard malathion. Comparing the two mass spectra, we found that they are nearly identical (Supplementary Figs. 11-23). See the Methods section for more details about the use of Spectracide as a source for malathion and Supplementary Figure 6 for the effect of Spectracide on the growth of the reporter strains.

To examine the transcriptional activity of *sfGFP*, controlled

by the biomarker gene promoters, cells are grown in rich medium and fluorescence output was measured every three minutes over 24 hours of growth. This resulted in 400 time points per reporter strain, a nearly 45 fold increase over the number of time points obtained via RNA-seq see Supplementary Figure 7. Prior to starting the experiment and collecting fluorescence measurements, reporter strains were induced with Spectracide to drive the reporter response. Due to the long half-life and fast maturation time of *sfGFP* [64], the reporter protein can accumulate inside the cell and does not accurately represent the mRNA abundance – which is subject to fast degradation by ribonucleases. This results in the genetic reporters serving as a proxy for the rate of transcription initiation over time, rather than mRNA abundance. This is distinctly different from the transcript abundance that is measured via RNA-seq due to the instability of mRNA molecules.

Examining the transcription initiation driven by malathion at distinct concentrations reveals detailed gene expression dynamics, dependencies of expression on malathion concentration, as well as the correlations. Firstly, the fold change (with respect to 0.0  $\mu\text{M}$  malathion and referred to as the background) reveals oscillatory signals in several strains; the reporters *atpB*, *petA*, *cspA2*, and *acrA* each contain oscillations that are near in phase at 0.38  $\mu\text{M}$  malathion (Figure 4c). As the concentration of malathion is increased, only *atpB* and *petA* appear to remain in phase while the signals of the other strains strongly increase. We also see that *anti-sigma 28 factor* and *rpoA* oscillate with lower frequency and that *anti-sigma 28 factor* hits a peak around 10 hours after induction while *rpoA* hits an anti-peak around 10 hours after induction. For the lower malathion concentration, *sucC* has a large lag time until transcriptional activation occurs, however there is a sharp decrease in the lag time at the higher concentration. The strains *acrA*, *gltA*, *putative outer membrane porin A*, *putative ABC transport system*, and *lpxC* consistently respond within minutes of malathion induction with *lpxC* being the reporter with highest signal over background and *acrA* the reporter with highest overall signal energy (area under the curve) in early times. Though *cspA2* was shown by the RNA-seq data to be repressed by malathion, we find that *cspA2* strain is consistently activated in the presence of malathion. Of the remaining repressed promoters, *uncharacterized protein II* is far more repressed in the presence of malathion across all concentrations tested.

The response curves of the reporter strains to malathion can be mathematically characterized by Hill functions [65] (Methods) which are described by two parameters. The first parameter is the Hill coefficient or cooperativity,  $n$ , which is a measure of how steep the response curve is. This is also denoted as a measure of ultrasensitivity which results in sigmoidal like response curves. The second parameter,  $K_M$ , is the Michaelis constant and it is equal to the malathion concentration at which the response is half of its minimum value subtracted from its maximum value. Figure 4d shows the malathion response curves of each reporter strain at the time point with maximum fold change with respect to the 0  $\mu\text{M}$  malathion condition. The solid line depicts the fit of a Hill function to the experimentally generated response curves and the parameters of each Hill function are given in Table 1. The response shown is the average fluorescence per cell obtained by normalizing the *sfGFP* signal by the optical density. See Supplementary Table 4 for the precise time points used here for each strain and see Methods for further details on parameter fitting.

We find that there is significant variation across the Hill coefficient, dynamic range, and Michaelis constant in the library of reporters (Figure 4d). The Hill coefficient,  $n$ , ranges from 1.1 to



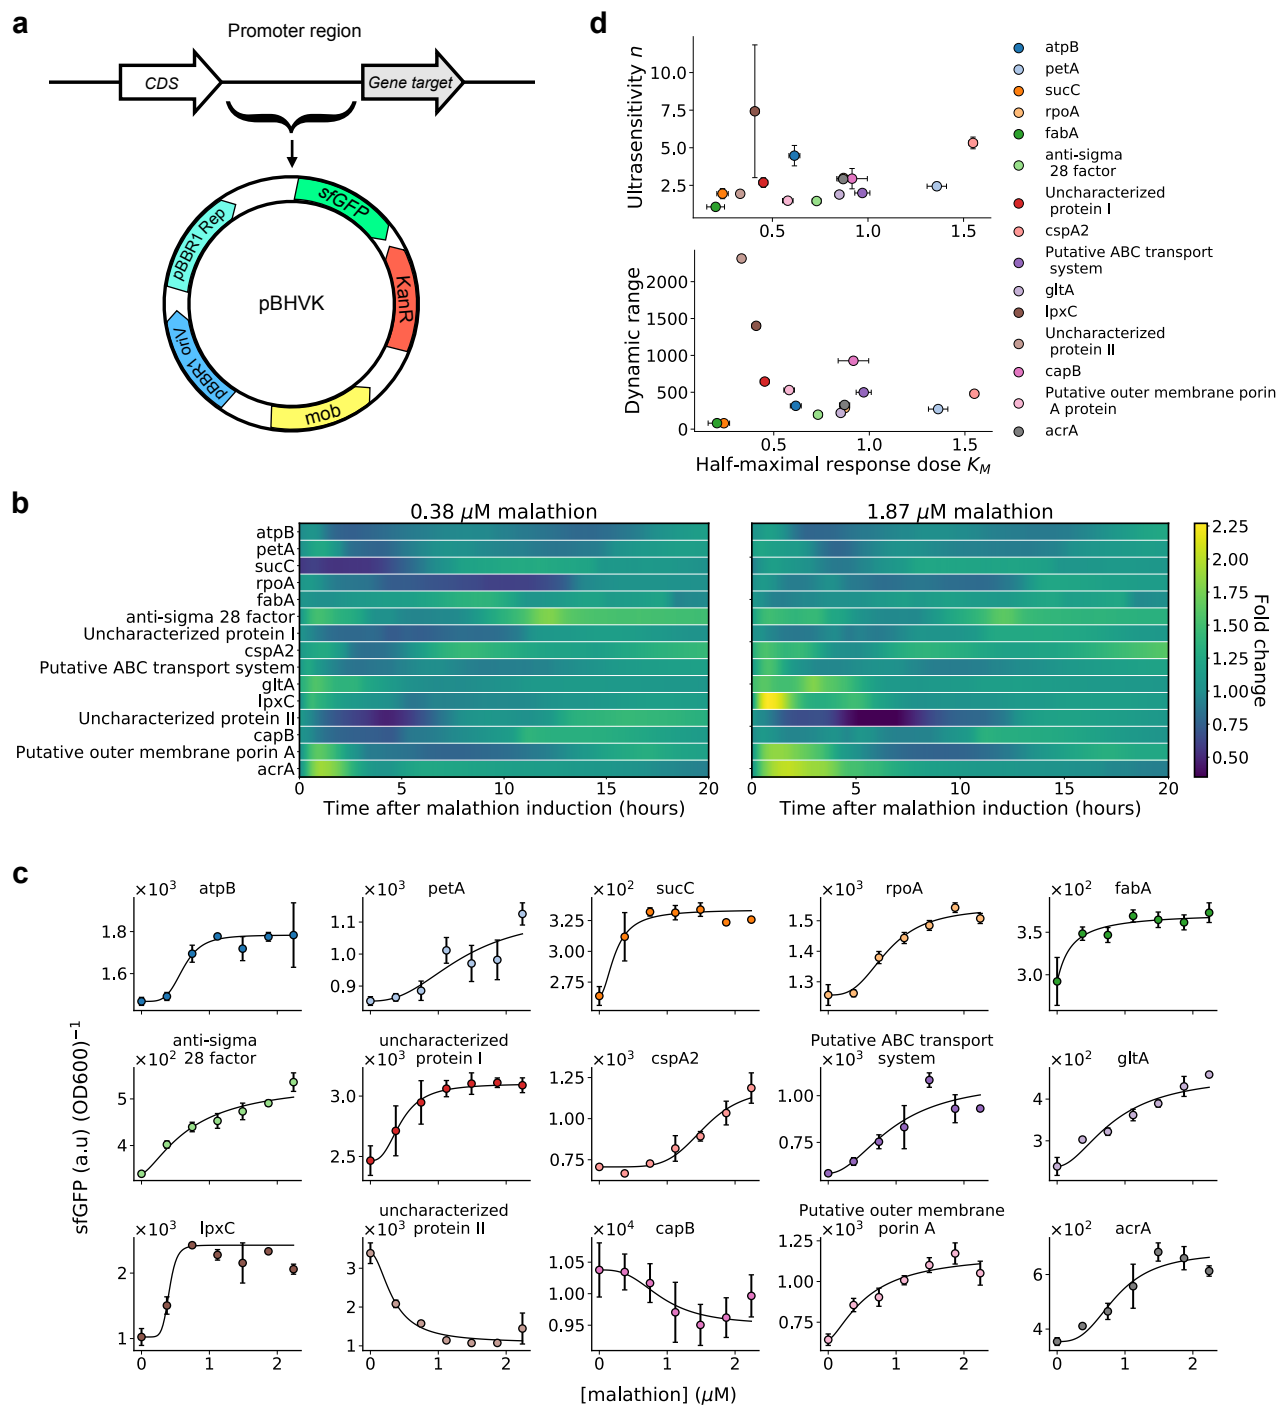

**Figure 4: Our machine learning approach successfully extracted 15 sensors, each with distinct malathion response curves.** (a) A map of the plasmid, pBHVK, used to construct the library. The plasmid contains a kanamycin resistance gene as well as a fast-folding *sfGFP* gene. (b) Hierarchical clustering performed on correlations between each pair of reporter strain response at 1.87  $\mu\text{M}$  malathion. (c) Average per cell *sfGFP* signal at 0.37  $\mu\text{M}$  (left) and 1.83  $\mu\text{M}$  (right) malathion normalized by signal at 0.0  $\mu\text{M}$  malathion is shown for all 15 engineered strains. (d) Transfer curves (or response curves) for each strain is depicted with markers and their fit to Hill equation kinetics are given by solid lines. The Hill equation parameters are given in Table 1. The promoter sequences corresponding to each reporter and time points for each transfer curve are given in Supplementary Tables 2 and 4, respectively. The error bars represent the standard deviation from the mean across three biological replicates.

691 7.4, and recalling that this parameter is a measure of sensitivity, 692 the extremes depicted by a small slope in strain *fabA* and large 693 slope in strain *sucC*, respectively. The dynamic range, measured 694 as the difference between the maximum signal and the minimum 695 signal, ranges from 80 to 1401 and is obtained by *sucC* and the

repressed *uncharacterized protein II*, respectively. The Michaelis 696 constant ranges from 0.2 to 1.5, depicted by the shift in malathion 697 concentration at which half of the maximum signal is achieved 698 from *fabA* and *cspA2*. 699

Overall, we find that each synthetic reporter, selected via our 700

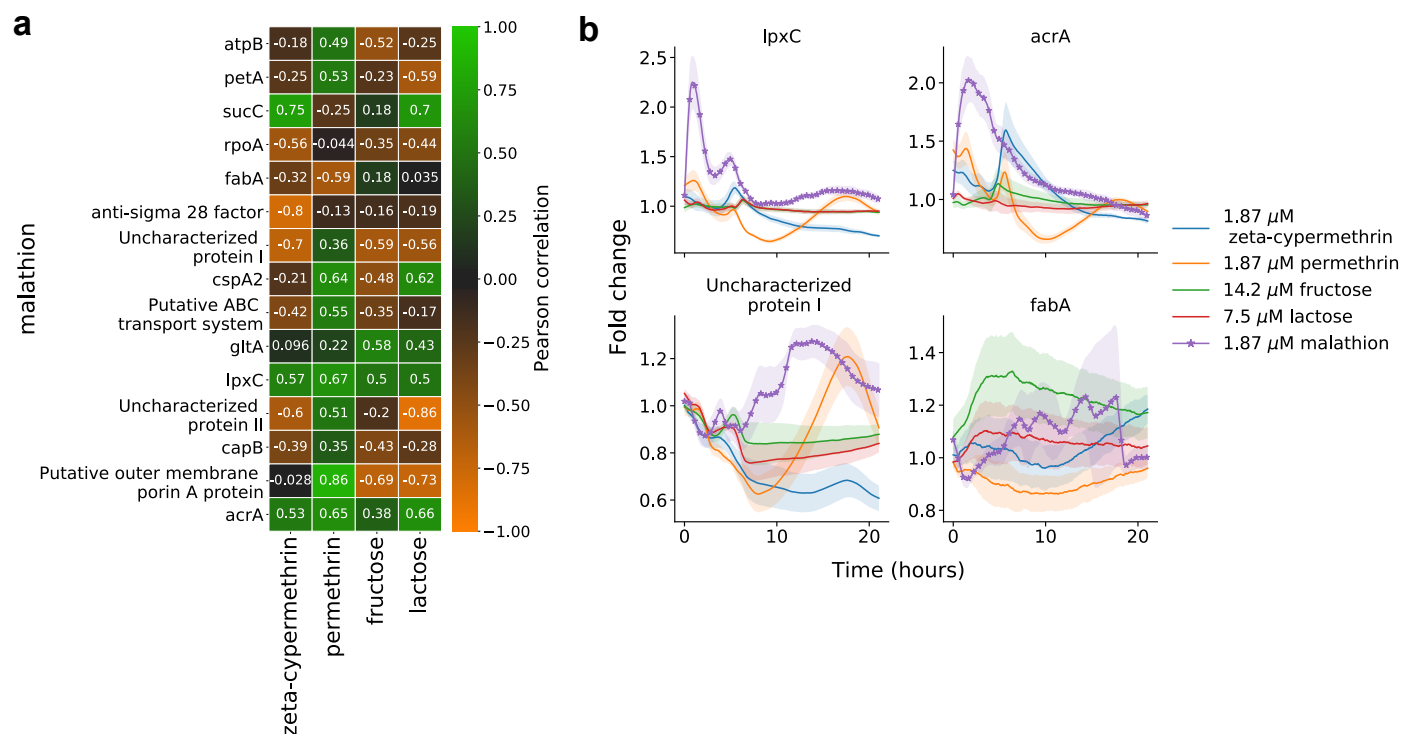

**Figure 5: The 15-dimensional genetic reporter cell state provides a unique response to malathion.** (a) For each genetic reporter, the heatmap depicts the Pearson correlation of the malathion fold change response (rows) with the fold change response to zeta-cypermethrine, permethrin, fructose, or lactose (columns). (b) The fold change response (reporter + compound with respect to reporter + no compound) of four reporters – two with highest overall correlation and two with lowest overall correlation across compounds. The error bars represent the propagated standard deviations of each of the individual responses across three biological replicates.

701 data-driven sensor placement framework, is capable of detecting  
 702 malathion with distinct dynamic ranges and sensitivity. We  
 703 next sought to characterize the specificity of the reporters to  
 704 malathion. We note that two of the selected reporters, *ABC*  
 705 *transporter* and *acrA*, are membrane transporters which often  
 706 respond to many environmental stimuli.

707 Through screening of our reporter library with four other com-  
 708 pounds, we found that the response of the reporters to malathion  
 709 is unique. To characterize the specificity of reporting to other  
 710 pesticides, we tested with zeta-cypermethrin and permethrin,  
 711 two frequently used pesticides. To test whether the reporters re-  
 712 sponse changes due to overall changes in metabolism, we tested  
 713 with the two sugars fructose and lactose. The concentration  
 714 of the pesticides were  $1.87 \mu\text{M}$  to be consistent with previous  
 715 malathion screens and the concentration of fructose and lactose  
 716 were  $14.2$  and  $7.5 \mu\text{M}$ , respectively. The time-lapse response of  
 717 all 15 reporters to the four compounds and malathion are shown  
 718 in Supplementary Figure 8.

719 In Figure 5a we show the Pearson correlation coefficients be-  
 720 tween reporter responses to malathion and reporter responses  
 721 to the four other compounds. The rows of the heatmap show  
 722 how correlated the malathion response of a single reporter is  
 723 across compounds while the columns show the overall correla-  
 724 tion of a compound response to the malathion response for the  
 725 15 reporters. The correlation metric shows that induction with  
 726 permethrin is most (linearly) related to malathion response  
 727 while induction with zeta-cypermethrin is least related to malathion  
 728 response.

729 Though the correlation coefficient between malathion response  
 730 and other compounds may be high for several (reporter, com-

731 pound) combinations (e.g. *lpxC* and *acrA*), the time-lapse re-  
 732 sponse of the reporters show significant deviations across com-  
 733 pound in their transient response. The top row of Figure 5b show  
 734 the fold change response of *lpxC* and *acrA* after perturbation  
 735 with each of the compounds. We see that at early times, the  
 736 response due to malathion is significantly larger compared to  
 737 the response due to other compounds. At later times, each of  
 738 the responses converges to a neutral fold change, resulting in an  
 739 overall high correlation. The bottom row Figure 5b shows the  
 740 fold change response of two reporters with overall negative  
 741 correlation across compounds. Here we see that both the transient  
 742 and long-term responses of other compounds deviate from the  
 743 malathion response.

744 We also see the activation of *fabA* with induction of fructose  
 745 and lactose. However, this is only the case for 1/3 of the re-  
 746 porters. Of the 15 reporters, 10 of them show no significant  
 747 response to fructose or lactose (see Supplementary Figure 8), in-  
 748 dicated that the overall the selected genes are not responding to  
 749 broad changes in metabolism.

750 Overall, through observability analysis for extraction of sensor  
 751 promoters and through the analysis presented in Figure 5a, we  
 752 find that the set of 15 reporters acts as a 15-dimensional cell  
 753 state that can be used for malathion sensing and detection. As  
 754 stated prior, though we cannot conclude from our experiments and  
 755 analysis that malathion directly interacts with any single promoter  
 756 we have extracted, the 15-dimensional fingerprint provided by  
 757 our reporters is unique and reproducible.

#### 758 Pooling reporters at the assay level results in an en- 759 hanced malathion reporter

760 We next sought to aggregate the response of each reporter to

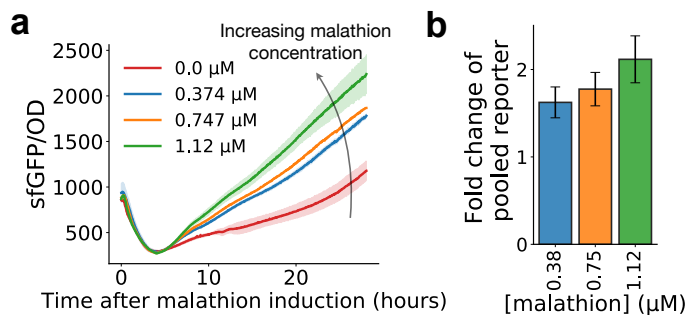

**Figure 6: Pooling all 15 malathion reporters results in enhanced reporting for environmental monitoring.** (a) Time-lapse response after pooling all 15 malathion reporters into a single well and inducing with malathion. Error bars represent the sample standard deviation across three biological replicates. (b) The fold change at 24 hours of the pooled reporter with malathion induction with respect to the pooled reporter without malathion induction. The error bars represent the propagated standard deviations of each of the individual responses across three biological replicates.

761 improve upon the signal-to-noise ratio (SNR). As individual sensor  
762 measurements are combined, the SNR must either remain  
763 constant or increase. In lieu of constructing a combinatorial pro-  
764 moter which can be challenging due to the curse of dimensionality  
765 when combining  $n$  promoters out of a set of  $N$  total promoters, we  
766 established a simpler protocol which pools individual malathion  
767 reporters into a single culture.

768 The motivation for such an experiment is due to the diffi-  
769 culty of strain isolation in an environmental setting. In order for  
770 our library of reporters to prove useful in the field, they should  
771 be able to operate in tandem without negative effects on the  
772 malathion response. To measure the response of all reporters in  
773 a pooled fashion, we first cultured all 15 reporter strains individu-  
774 ally. Then before taking measurements, we pooled all the strains  
775 in equal numbers by carefully measuring the density of each cul-  
776 ture. The pooled culture was then put into a plate reader and the  
777  $sfGFP$  and optical density were measured over time.

778 Pooling all 15 genetic reporters results in a salient malathion  
779 response. The time-lapse curves of the  $sfGFP$  normalized by cell  
780 density are shown in Figure 6a and the fold change 24 hours  
781 after malathion induction is shown in Figure 6b for varying con-  
782 centrations. At a malathion induction concentration of  $1.12 \mu\text{M}$ ,  
783 the pooled reporter exhibits a sustained response after an initial  
784 transience with a fold change of 2.1 after 24 hours of growth.  
785 In contrast, the maximum fold change achieved by any individ-  
786 ual reporter at the same concentration is 2.3 and is a transient  
787 response ( $lpxC$ , see Figure 5b). The maximum fold change cor-  
788 responding with a sustained response is 1.5 obtained by  $cspA2$ .  
789 For sustained salient to malathion, the pooled reporter provides  
790 more salient response than any individual reporter alone.

791 Our experiments confirm the usefulness of the malathion rep-  
792 orters outside of the laboratory and in field environments. A  
793 potential strategy for environmental malathion monitoring would  
794 be to collect a soil sample, culture the pooled reporters from a  
795 media made from the sample, then measure the  $sfGFP$  response.  
796 Though this strategy is enticing, we next aim to understand if  
797 it is possible to detect malathion in environmental samples from  
798 our individual reporters.

799 **Detecting malathion in environmental samples.** The  
800 malathion reporter library, selected through observability analy-  
801 sis, has only been examined in an ideal laboratory scenario with

802 either pure or processed malathion whose mass spectrum has  
803 been analyzed; it is not yet known if the reporters will be able  
804 to sense malathion when induced with actual environmental wa-  
805 ter samples that have been treated with the insecticide. In  
806 the previous section we showed that pooled reporters act as salient  
807 malathion sensors. However, confounding factors may be present  
808 in the environmental sample such as other small compounds that  
809 may make it difficult to deconvolve malathion response from the  
810 response due to the confounder. Therefore, in this section we de-  
811 scribe an experiment to assess whether or not the malathion con-  
812 centration can be deduced from our individual reporters treated  
813 with environmental insecticide samples.

814 In order to test if the genetic reporters can sense malathion  
815 from environmental samples, irrigation water was collected from  
816 three crops after being sprayed with a mixture of Spectracide  
817 (50% malathion) and water (Figure 7a). The concentration of  
818 the mixture sprayed was either 0, 1, or 8 times the maximum rec-  
819 ommended working concentration of Spectracide – 1 fluid ounce  
820 per gallon of water. To rid the solution of unwanted microbes  
821 and particles, the irrigation water was strained and filtered prior  
822 to the induction of the genetic reporters (see Methods). The  
823 growth and induction protocols all remain the same as for the  
824 samples treated with Spectracide in Figure 4c,d.

825 We found that a total 9 out of the 15 of the reporters were acti-  
826 vated by induction of the irrigation water containing malathion.  
827 Fig 7a shows the average per cell fluorescence 24 hours after  
828 induction of the nine strains subjected to 0, 1, or 8 times the  
829 working concentration of Spectracide. The reporters  $atpB$ ,  $petA$ ,  
830  $sucC$ ,  $rpoA$ ,  $fabA$ , and  $gltA$  all show a response to malathion at 1x  
831 working concentration, while the remaining three did not show  
832 significant differences from the negative control in this range.  
833 Among the strains in Figure 7b, the strain  $sucC$  was activated  
834 the most, showing an 80% increase from the 0x to 8x condition  
835 after the 24 hour time period. This shows that many of the se-  
836 lected genetic reporters, 60%, are able to detect malathion in  
837 environmentally relevant scenarios, and, furthermore, we can use  
838 this data to infer the concentration of malathion present in the  
839 samples collected from the environment.

840 The response curves characterized previously in Figure 4d for  
841 each of the genetic reporters can be used to make an inference  
842 about the amount of malathion present in each environmental  
843 sample. Note that we are making the assumption that the re-  
844 sponse curves characterized for each of the nine reporters can be  
845 applied to this new setting of treatment with irrigation water.  
846 With this assumption we can then use the fitted Hill equations  
847 from Figure 4d and numerically estimate the malathion concen-  
848 tration that reproduces the signal at 1 or 8 times the working  
849 concentration of Spectracide. The results obtained are shown in  
850 Figure 7b for each of the nine strains. Through this approach, the  
851 reporters provide a range of inferred malathion concentrations;  
852 at the working concentration of Spectracide, we can infer that  
853 the concentration of malathion is in the range  $0.48 - 0.97 \mu\text{M}$   
854 and at 8 times the working concentration of Spectracide, we can  
855 infer the concentration of malathion to be in the range  $0.82 - 2$   
856  $\mu\text{M}$ . It is important to note that for most, if not all, of the char-  
857 acterized reporter strains,  $2 \mu\text{M}$  was the maximum discernable  
858 concentration before the signal saturates. Therefore, it is possi-  
859 ble the concentration of malathion is higher than  $2 \mu\text{M}$ , however  
860 that range cannot be detected by our reporter library.

## 861 Discussion

862 It is often the case that biologists seek to identify key genes which  
863 show variation for the biological process of interest. Many tools

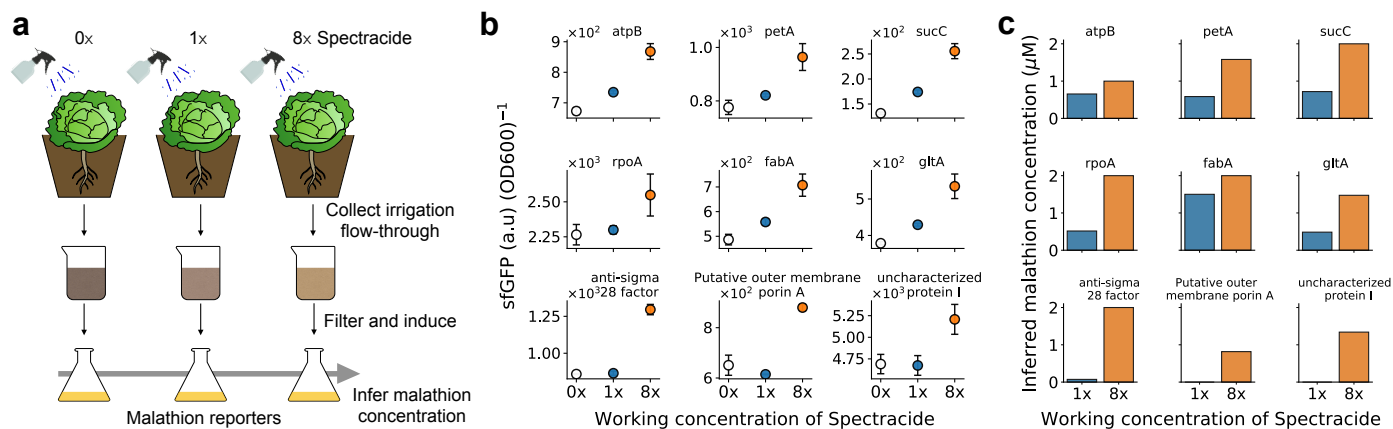

**Figure 7: Irrigation water containing malathion from an agricultural setting activates transcriptional reporters and allows for inference of environmental malathion concentration.** (a) Three cabbage plants are sprayed with a solution of 0, 1, and 8 times the working concentration of Spectracide, respectively. The flow-through is first captured and filtered and then used to induce transcriptional activity in the malathion reporter strains. Using previously characterized response curves for each reporter, an inference for the malathion concentration can be made. (b) The average per cell fluorescence (arbitrary units) of 9 out of the 15 malathion reporters, after 24 hours of induction, showed activation due to the soil runoff solution containing malathion. The working concentration of Spectracide is instructed as 1oz of Spectracide to 1 gallon of water. The error bars represent the sample standard deviation from the mean across three biological replicates. (c) The concentration of malathion present in the irrigation water is inferred using the signal from (b) and the fitted response curves from Figure 4d.

864 have been developed or adapted to meet this need e.g. differential  
865 expression, principal component analysis, and gene regula-  
866 tory network reconstruction to name only a few. However, when  
867 using the current tools, there is potential to measure features  
868 that are redundant which can lead to wasted time and resources.  
869 Furthermore, traditional tools do not provide the capability of  
870 optimal gene selection for downstream targeted gene profiling.  
871 Therefore, we developed an efficient method that ranks the fea-  
872 tures for optimal gene selection. The method combines dynamic  
873 mode decomposition (DMD) and observability of dynamical sys-  
874 tems to provide a systematic approach for the discovery of genes  
875 which act as biomarkers for the perturbation-inducible cell state.  
876 To extract optimal perturbation sensitive promoters from our  
877 model, we showed that genes which contribute highly to observ-  
878 ability inform the design of transcriptional reporters that exhibit  
879 condition specific sensing.

880 We introduced DMD as a novel tool for analysis of transcriptome  
881 dynamics. In this case, we studied bulk transcriptome  
882 dynamics at the minutes resolution and showed that the low-  
883 dimensional DMD representation accurately predicts the dynam-  
884 ics and clusters genes based on temporal behavior. Our results  
885 suggest that DMD is a capable tool for analysis of transcriptomic  
886 data and warrants further exploration in single-cell RNA-seq and  
887 other 'omics technologies that aim to infer cell trajectories, pseu-  
888 dotime, and single-cell regulatory networks.

889 The identification of transcriptional genetic sensors was posed  
890 as a design challenge, where a subset of genes are selected to  
891 maximize the observability of the cell state. It was shown that a  
892 large fraction of genes contribute insignificantly to the cell state  
893 observability when only few time points are measured, further  
894 validating the common knowledge that genetic networks possess  
895 redundancies and are noisy. We also showed that it is signifi-  
896 cantly more beneficial to measure a sparse set of genes for more  
897 time points than to measure more genes for fewer time points.  
898 Our results suggest future joint experimental and computational  
899 approaches which limit the amount of resources required to get  
900 a full description of the system dynamics. A natural extension  
901 of our work is to determine how well measurements from a small

902 library of reporters recapitulate the bulk cell state under unseen  
903 conditions. Such studies will inform how RNA-seq data should  
904 be collected in the future in order to maximize the reconstruction  
905 accuracy and minimize labor and experimental costs.

906 The machine learning driven selection of genetic reporters was  
907 shown to produce 15 functional genetic reporters with a vari-  
908 ety of malathion dose-response curves. We demonstrated how  
909 to aggregate information from each reporter to create a pooled  
910 reporter. Moreover, we showed that the genetic reporters can be  
911 used to detect malathion in environmental settings, closing the  
912 design-build-test loop. More generally, our results and method-  
913 ology offer an innovative approach that can be used to identify  
914 perturbation-inducible gene expression systems. We emphasize  
915 that our approach takes advantage of the largely untapped re-  
916 sources present in native host genomes and we anticipate that  
917 techniques like the one developed here will accelerate the opti-  
918 mization of parts for synthetic biologists to build useful devices  
919 from.

920 Our approach makes no assumptions on the nature of the under-  
921 lying system. In that sense, the framework we have devel-  
922 oped is general and can be applied to data generated from other  
923 'omics techniques and from any organism. In the case that a lin-  
924 ear response model is insufficient for capturing the transcriptome  
925 dynamics, it can be extended to a variety of nonlinear models to  
926 capture nonlinear modes of response [56, 66].

927 Due to only analyzing the transcriptome of SBW25 under spe-  
928 cific environmental conditions, our approach cannot guarantee  
929 that the identified sensor promoters respond directly to the tar-  
930 get analyte of interest. Our approach to biosensing is to view  
931 a proxy of the entire cell state, which is a function of the en-  
932 tire underlying network. While this approach is novel, it also  
933 implies that the identified sensor promoters may not work in a  
934 different host or environmental context. Further refinement of  
935 the list of biomarker genes could be obtained by fusing ChIP-  
936 seq (chromatin immunoprecipitation followed by sequencing) with  
937 RNA-seq measurements to discover transcription factors, how-  
938 ever such an experimental assay can be prohibitively expensive.  
939 The DNA binding sites measured by ChIP-seq alone are not suffi-

940 cient to infer regulation of transcription. However, together with  
941 RNA-seq, the set of biomarkers which causally drive the condi-  
942 tion specific response can be uncovered. We envision that our  
943 method will accelerate the discovery and design of biosensors in  
944 novel host organisms for synthetic biology applications.

## Methods

**Rapid culture sampling.** For each biological replicate, *Pseudomonas fluorescens SBW25* glycerol stock was scraped and inoculated in 5 mL of fresh LB broth (Teknova Catalog no. L8022) and was incubated and shaken at 30°C and 200 r.p.m. for 15 hours. The OD<sub>600</sub> of the 5 mL culture was measured and the entire culture was transferred to 50 mL of fresh LB broth, which was then proceeded by incubation and shaking. Once the OD<sub>600</sub> of the 50 mL culture reached 0.5, the culture was again passaged into 300 mL of fresh LB broth. The 300 mL culture was grown until OD<sub>600</sub> of 0.5. Then the culture was split into two 150 mL cultures (one for malathion induction and one for the negative control). The two cultures were sampled at evenly spaced intervals in time (see Supplementary Table 1 for sampling volumes and times) and after the 0 minute sample, malathion (Millipore Sigma Catalog no. 36143) was introduced to the positive condition at 1.83 mM. To separate the media from the cells, a vacuum manifold with 3D printed filter holders was constructed and utilized (Supplementary Figure 10). 0.45 μm PVDF membrane filters (Durapore Catalog no. HVLP04700) were placed on the filter holders, a vacuum pump was turned on, and the culture sample was dispensed onto the center of the filter, quickly separating the media from the cells. The filter with the cells was then placed into a 50 mL conical centrifuge tube (Fisher Scientific 1495949A) using sterile tweezers. The tube with the filter was then submerged into a liquid nitrogen bath for 10 seconds to flash freeze the sample. The sample were then stored -80 °C.

**RNA extraction.** To extract the RNA, first the filter-harvested cells were resuspended in 2 mL RNeasy Protect Bacterial Reagent (Qiagen Catalog no. 76506), then pelleted in a centrifuge. To lyse the cells, the pellet was then resuspended in 200 μL of TE Buffer containing 1 mg/mL lysozyme. The RNA was then extracted from the lysed cells using Qiagen RNeasy Mini Kit (Catalog no. 74104), and the samples were DNase treated and concentrated using Zymo RNA Clean and Concentrator (Catalog no. R1019).

**RNA library preparation and sequencing.** Bacterial rRNA was depleted using NEBNext Bacterial rRNA Depletion Kit (Catalog no. E7850X). The indexed cDNA library was generated using NEBNext Ultra II Directional RNA Library Prep (Catalog no. E7765L) and NEBNext Multiplex Oligos for Illumina (Catalog no. E6609S). In total, 40 samples (two biological replicates, 10 time points, two conditions) were prepped and sequenced. The library was sequenced at the Genetics Core in the Biological Nanostructures Laboratory at the University of California, Santa Barbara on an Illumina NextSeq with High Output, 150 Cycle, paired end settings.

**Pre-processing of sequencing data.** The raw reads were trimmed for adapters and quality using Trimmomatic [67]. The reads were then pseudoaligned with Kallisto [68] to the *Pseudomonas fluorescens SBW25* transcriptome generated using GFFRead [69] and GenBank genome AM181176.4. The normalized gene expression of transcripts per million (TPM), which takes into account sequencing depth and gene length, are used for modeling and analysis. Genes with an average TPM less than 100 in all experimental conditions were discarded from our analysis.

**Malathion reporter library cloning.** For the reporter plasmid cassette design, first, the closest intergenic region to the gene target larger than 100 base pairs (bp) was identified based on the open reading frame of the sequenced genome of *Pseudomonas fluorescens SBW25* (GenBank genome AM181176.4). Primers were designed to include the entire intergenic region in order to capture any transcription-regulator binding sites surrounding the promoter (Figure 4a). The identified intergenic regions were amplified using the primers and this is what we refer to as 'promoter regions' following the terminology of [70]. The promoter regions were cloned into a cassette on the plasmid backbone pBHVK (Supplementary Figure 5) containing a bicistronic ribosome binding site and super folder GFP (*sfGFP*) as the reporter gene.

Lastly, a cloning site was placed in the cassette so that the cloned promoter controls transcriptional activity of *sfGFP*.

The promoters were assembled onto the plasmid backbone pBHVK (see Supplementary Fig. 5) via Golden Gate Assembly [71] using NEB Golden Gate Assembly Kit (Catalog no. E1601S). Because of the potential of arcing during electrotransformation of *Pseudomonas fluorescens SBW25* with Golden Gate reaction buffers, the plasmids are first subcloned into *E. coli Mach1* (Thermo Fisher Scientific Catalog no. C862003) following the manufacturer's protocol for chemical transformation. Between three and six colonies are selected for each strain and the reporter cassette was sent for sequencing at Eurofins Genomics. Then the plasmid DNA was prepared from cultures of transformed Mach1 cells using Qiagen Spin Miniprep Kit (Catalog no. 27106) followed by chemical transformation into *SBW25*. *SBW25* was made chemically competent by washing a culture at OD<sub>600</sub> of 0.3 with a solution of 10% glycerol two times, then resuspending in 500 μL of 10% glycerol. The plasmid DNA is added to 80 μL of the cell suspension and kept at 4°C for 30 minutes, then the cells were electroporated with 1600 V, 200 Ω, and 25 μF. The cells were immediately resuspended in 300 μL of SOC Broth (Fischer Scientific Catalog No. MT46003CR), recovered for 2 hours at 30°C in a shaking incubator, and plated onto 1.5% LB Agar plates with 50  $\frac{\mu\text{g}}{\text{mL}}$  Kanamycin. Again, three to six colonies of each strain have their reporter cassette sequenced at Eurofins Genomics and simultaneously glycerol stocks of each colony is prepared for long term storage.

**Photobleaching of Spectracide.** Spectracide malathion insect spray concentrate (Spectracide Catalog no. 071121309006) was utilized as the environmentally relevant source of malathion for the reporter library testing and contains 50% malathion. Spectracide is an opaque liquid. We found that we can remove the opaque substances by photobleaching a 5% Spectracide solution (in LB) in a Synergy H1 plate reader (Biotek), at 30°C and 800 r.p.m. OD<sub>600</sub> and fluorescence (excitation 485nm, emission 528nm) were measured every 3 minutes for 8 hours. To ensure malathion remained in solution after photobleaching, the mass spectrum was analyzed at the University of California, Santa Barbara Mass Spectroscopy Facility. From this we determined that malathion is stable for the course of the photobleaching (Supplementary Figures 11 to 23).

**Plate reader assays to measure response curves and doubling times.** Scrapes of culture from glycerol stocks of each strain were used to inoculate 3 mL of LB (Kanamycin 50  $\frac{\mu\text{g}}{\text{mL}}$ ) in 10 mL 24 deep-well plate sealed with a breathable film (Spectrum Chemical Catalog no. 630-11763) and grown at 30°C overnight in a shaker incubator. The overnight cultures were diluted to an OD<sub>600</sub> of 0.1 in 2 mL of LB and the cultures were grown for an additional 2 hours. 250 μL of this culture was then transferred to a 96 well optically-transparent microtiter plate. Photobleached spectracide (50% malathion) is then introduced (if relevant) to the cultures in the wells to give the desired concentration of malathion, and grown in a Synergy H1 plate reader (Biotek), at 30°C and 800 r.p.m. OD<sub>600</sub> and *sfGFP* (excitation 485nm, emission 528nm) was measured every 3 minutes for 48 hours. Each data point in a response curve was generated by normalizing the *sfGFP* signal (arbitrary fluorescence units) by the OD<sub>600</sub> to give the average per cell fluorescence, and only the data points before cell death (due to nutrient depletion or media evaporation) are used. The strain growth rates were calculated as  $\ln(\text{initial OD}_{600}/\text{final OD}_{600})/(t_{\text{final}} - t_{\text{initial}})$ , where the initial OD<sub>600</sub> is the first measurement within the exponential phase and final OD<sub>600</sub> is the last measurement within the exponential phase. Then the strain doubling times were calculated as  $\ln(2)$  divided by the growth rate.

**Collection and cleanup of irrigation water treated with Spectracide.** Three cabbage plants were each potted in 5 gallon buckets with fresh soil and a water catchment tray was placed under the plants to catch flow through. The first plant was sprayed with water containing no malathion and the flow through was collected in a 1 L pyrex bottle. The second plant was sprayed with a Spectracide (50% malathion) solution at a concentration of 1 fluid ounce per gallon water – the maximum working concentration of Spectracide as recommended by the manufacturer. Lastly, the third plant was sprayed with the solution at 8 fluid ounces per gallon of water. Each plant was sprayed for one minute and the collected flow through from each plant were first strained using a 40 μm cell strainer (VWR 76327-098) to remove large microorganisms and large particles. The strained samples

were then centrifuged to separate dense, soil particles from the Spectra-tride solution. Finally, the supernatant was vacuum filtered through a 0.22  $\mu\text{m}$  membrane before induction of the reporters. The protocol for induction of the reporters with the irrigation water is the same as above.

**Computing the dynamic mode decomposition.** We now discuss the details of applying dynamic mode decomposition (DMD) to time-series data obtained from sequencing. As mentioned previously, many algorithms have been developed to compute the DMD modes, eigenvalues, and amplitudes, and a key requirement of almost all of the techniques is that the time points are spaced uniformly in time. In our work we begin by collecting the data for a single experimental condition into a time-ordered matrix,  $\mathbf{X}$ , which contains a total of  $m \times r$  data snapshots for a data set with  $m$  time points and  $r$  replicates. For response to malathion, each  $\mathbf{x}_i^{(j)}$  corresponds to the gene expression vector at time  $i$  in replicate  $j$  and is in the  $((i+m) \times j)$ th column of the data matrix  $\mathbf{X}$  where  $i \in \{0, 1, \dots, m-1\}$  and  $j \in \{1, 2, \dots, r\}$ . For gene expression data obtained from RNA-seq, each data snapshot typically contains thousands of rows denoted by  $n$ . The  $n \times rm$  data matrix for the response to malathion is then given by

$$\mathbf{X}_{\text{malathion}} = \begin{bmatrix} \mathbf{x}_0^{(1)} & \mathbf{x}_1^{(1)} & \dots & \mathbf{x}_{m-1}^{(1)} & \mathbf{x}_0^{(2)} & \dots & \mathbf{x}_{m-1}^{(2)} & \dots \end{bmatrix} \quad (5)$$

where each  $\mathbf{x}_i \in \mathbb{R}^n$  represents the gene expression given in transcripts per million (TPM) from the malathion condition. Similarly, the data matrix for the control condition is constructed. The fold change data matrix,  $\mathbf{Z}$ , is subsequently computed as  $\mathbf{Z} = \mathbf{X}_{\text{malathion}} \oslash \mathbf{X}_{\text{control}}$ , where  $\oslash$  denotes the Hadamard (element-wise) division of two matrices. Next we compute the mean-subtracted and standard deviation-normalized data matrix  $\bar{\mathbf{Z}}$

$$\bar{\mathbf{Z}} = \begin{bmatrix} \mathbf{z}_0 - \boldsymbol{\mu}_{0:m-1} & \mathbf{z}_1 - \boldsymbol{\mu}_{0:m-1} & \dots & \mathbf{z}_{m-1} - \boldsymbol{\mu}_{0:m-1} \\ \sigma_{0:m-1}^2 & \sigma_{0:m-1}^2 & \dots & \sigma_{0:m-1}^2 \end{bmatrix} \quad (6)$$

where  $\boldsymbol{\mu}_{0:m-1}$  is the vector of time-averages of each gene and  $\sigma_{0:m-1}^2$  is the vector of time-standard deviations of each gene. The divisions in Eq. (6) are performed element-wise. We see that  $\bar{\mathbf{Z}}$  is obtained by removing the time-averages from each gene and standardizing the time-variances of each gene. The mean subtraction operation is motivated by the fact that the mean of the data corresponds to the eigenvalue  $\lambda = 1$ , which is always an eigenvalue of the Koopman operator, the operator that DMD ultimately aims to approximate [72], and not one we are particularly interested in. The normalization by the standard deviation is performed so that the magnitude of the fold change has no implication on the connectivity of the learned dynamical system.

The algorithm we make use of to compute the dynamic mode decomposition (and the approximation of the Koopman operator) is exact DMD [37], which aims to identify the best-fit linear relationship between the following time-shifted data matrices

$$\bar{\mathbf{Z}}_p = [\bar{\mathbf{z}}_0 \quad \bar{\mathbf{z}}_1 \quad \dots \quad \bar{\mathbf{z}}_{m-2}], \quad \bar{\mathbf{Z}}_f = [\bar{\mathbf{z}}_1 \quad \bar{\mathbf{z}}_2 \quad \dots \quad \bar{\mathbf{z}}_{m-1}]$$

such that

$$\bar{\mathbf{Z}}_f = \mathbf{K}\bar{\mathbf{Z}}_p + \mathbf{r} \quad (7)$$

where  $\mathbf{r}$  is the residual due to  $\mathbf{K}$  only providing an approximation of the actual dynamics. Note that there are  $n^2$  unknown parameters in  $\mathbf{K}$  and  $n \times m$  equations in Eq. (7). The residual is then minimized by Exact DMD (in the least squares sense) by first considering the reduced singular value decomposition (SVD) of  $\bar{\mathbf{Z}}_p = \mathbf{U}\boldsymbol{\Sigma}\mathbf{T}^\top$  where  $\boldsymbol{\Sigma} \in \mathbb{R}^{k \times k}$ . As the number of time points,  $m$ , obtained from sequencing is typically much less than the number of genes,  $n$ , we keep  $k \leq m$  singular values. Recognizing that minimizing the residual requires it to be orthogonal to the left singular vectors, we can pre-multiply (7) with  $\mathbf{U}^\top$  to obtain

$$\mathbf{U}^\top \bar{\mathbf{Z}}_f = \mathbf{K}\mathbf{U}\boldsymbol{\Sigma}\mathbf{T}^\top. \quad (8)$$

Rearranging the above equation, it is shown that  $\mathbf{K}$  is related to  $\hat{\mathbf{K}}$  through a similarity transformation as shown in Eq. (9)

$$\hat{\mathbf{K}} = \mathbf{U}^\top \bar{\mathbf{Z}}_f \mathbf{T}\boldsymbol{\Sigma}^{-1} = \mathbf{U}^\top \mathbf{K}\mathbf{U} \quad (9)$$

meaning that the eigenvalues of  $\hat{\mathbf{K}}$ ,  $\lambda$ , are equivalent to the  $k$  leading eigenvalues of  $\mathbf{K}$  while the eigenvectors of  $\hat{\mathbf{K}}$ ,  $\mathbf{s}$ , are related to the  $k$  leading eigenvectors of  $\mathbf{K}$ ,  $\mathbf{v}$ , by  $\mathbf{v} = \mathbf{U}\mathbf{s}$ . This eigendecomposition

then allows the fold change response to be written as the following spectral decomposition

$$\hat{\mathbf{z}}_i = \sum_{j=1}^k \mathbf{v}_j \lambda_j^i \mathbf{b}_j = \mathbf{V}\boldsymbol{\Lambda}^i \mathbf{b} \quad (10)$$

where  $\mathbf{V}$  is a matrix whose columns are the eigenvectors (DMD modes)  $\mathbf{v}_j$ , and  $\mathbf{b}$  is a vector of amplitudes corresponding to the gene expression at the initial time point as  $\mathbf{b} = \mathbf{V}^\dagger \hat{\mathbf{z}}_0$ . Here  $\dagger$  represents the Moore-Penrose pseudoinverse of a matrix.

Using the above spectral decomposition, the modes can then be evolved in time for  $m-1$  time steps to reconstruct the data from knowledge of the initial condition. Evolving past the  $m$ th time point allows for forecasting of the fold change response. To measure the accuracy of reconstruction we use the coefficient of determination

$$R^2 = 1 - \frac{\sum_{i=0}^m (\hat{\mathbf{z}}_i - \bar{\mathbf{z}}_i)}{\sum_{i=0}^m (\hat{\mathbf{z}}_i - \bar{\mathbf{z}})} \quad (11)$$

where  $\bar{\mathbf{z}}$  is the vector of each gene's mean expression, formally  $\bar{\mathbf{z}}^{(j)} = \sum_{k=0}^m \hat{\mathbf{z}}_k^{(j)}$ , and  $\bar{\mathbf{z}}_k = \mathbf{K}^k \hat{\mathbf{z}}_0$  is the prediction of  $\hat{\mathbf{z}}_k$  given by the model starting from the initial condition.

**Computing the gene sampling weights.** Here we describe our methodology for ranking genes based on their contribution to the observability of the dynamical system learned via dynamic mode decomposition. We start by introducing the energy of a signal in discrete-time as

$$E_y = \sum_{i=0}^{\infty} \mathbf{y}_i^\top \mathbf{y}_i \quad (12)$$

which is closely related to the idea of energy in the physical sense and where  $\mathbf{y} = \mathbf{W}\bar{\mathbf{z}}$  are measurements of the system state and  $\mathbf{W} \in \mathbb{R}^{p \times n}$ . Rewriting the signal energy (12) using the recursion for  $\mathbf{y}$  given as  $\mathbf{y}_i = \mathbf{W}\mathbf{K}^i \bar{\mathbf{z}}_0$ , we can reveal the connection between energy and observability

$$\begin{aligned} E_y &= \sum_{i=0}^{\infty} \bar{\mathbf{z}}_0^\top \mathbf{K}^{i\top} \mathbf{W}^\top \mathbf{W} \mathbf{K}^i \bar{\mathbf{z}}_0 \\ &= \bar{\mathbf{z}}_0^\top \left( \sum_{i=0}^{\infty} \mathbf{K}^{i\top} \mathbf{W}^\top \mathbf{W} \mathbf{K}^i \right) \bar{\mathbf{z}}_0 \\ &= \bar{\mathbf{z}}_0^\top \mathcal{X}_o \bar{\mathbf{z}}_0 \end{aligned} \quad (13)$$

where  $\mathcal{X}_o$  is the infinite-horizon observability gramian, a symmetric matrix that is unique if the eigenvalues of  $\mathbf{K}$  all have magnitude less than 1. The observability gramian describes how much gain will be attained by a system's output,  $\mathbf{y}$ , given an initial condition  $\bar{\mathbf{z}}_0$ . It simultaneously gives a measure of how well the initial condition  $\bar{\mathbf{z}}_0$  can be estimated given only measurements of the system state  $\mathbf{y}$  [61].

We use the observability gramian along with the measure of energy it provides to optimize for the gene sampling weights in the rows of  $\mathbf{W}$  that maximize the signal energy  $E_y$ . Formally, the objective function is given as

$$\begin{aligned} &\max_{\mathbf{W} \in \mathbb{R}^{p \times n}} \bar{\mathbf{z}}_0^\top \mathcal{X}_o \bar{\mathbf{z}}_0 \\ &\text{subject to } \mathbf{W}\mathbf{W}^\top = \mathbf{I}_{p \times p}. \end{aligned} \quad (14)$$

where we seek the matrix  $\mathbf{W}$  that maximizes the observability of the cell state  $\bar{\mathbf{z}}_0$ . The constraint above enforces the following three points, i) the length of each row vector in  $\mathbf{W}$  is not important, we are only concerned with the direction and the constraint sets the length of each row vector to be equal to 1, ii) the maximization problem is well-posed, i.e. the objective cannot blow up to infinity with the length constraint, and iii) the rows of  $\mathbf{W}$  form  $p$  vectors of an orthonormal basis for  $\mathbb{R}^p$ , i.e.  $\mathbf{W}\mathbf{W}^\top = \mathbf{I}_{p \times p}$ . Each row vector in  $\mathbf{W}$  can then be viewed as a set of weights, each orthogonal to one another, that rank genes based on their contribution to the observability of the system. The optimization problem (14) represents a quadratic program with linear constraints, and the rows of  $\mathbf{W}$  which maximize the objective are the  $p$  eigenvectors corresponding to the  $p$  eigenvalues with highest magnitude of the Gram matrix

$$\mathbf{G} = \sum_{i=0}^{\infty} \mathbf{K}^i \bar{\mathbf{z}}_0 \bar{\mathbf{z}}_0^\top \mathbf{K}^{i\top}. \quad (15)$$

Since  $\mathbf{G} \in \mathbb{R}^{n \times n}$  is a sum of quadratic forms, the result is that  $\mathbf{G}$  has non-negative, real-valued eigenvalues. If the eigendecomposition is  $\mathbf{G} = \mathbf{Q}\mathbf{D}\mathbf{Q}^{-1}$ , then the solution to the optimization problem Eq. (14) is

$$\mathbf{W} = \begin{bmatrix} \mathbf{q}_1^\top \\ \vdots \\ \mathbf{q}_p^\top \end{bmatrix} \quad (16)$$

where  $\mathbf{q}_1$  through  $\mathbf{q}_p$  are the top eigenvectors of the Gram matrix  $\mathbf{G}$ . The proof of the solution to the optimization problem is provided in the Supplementary Information (Section 1.1). The single set of gene sampling weights that maximize the observability are precisely  $\mathbf{q}_1$  and from here on out we call these weights  $\mathbf{w}$ .

Since transcriptomic data sets typically have few initial conditions, i.e. biological and technical replicates, before solving for  $\mathbf{w}$  we enrich our data set with  $N$  synthetic initial conditions that are randomly sampled as  $Uniform(\min(\bar{\mathbf{z}}_0^{(j)}), \max(\bar{\mathbf{z}}_0^{(j)}))$  where  $j$  in  $\{1, 2, \dots, r\}$  and  $r$  is the number of replicates. The motivation for the artificial data generation is given in [73], where it is shown that artificially generated data points improved the estimate of the DMD model when the data set is affected by noise.  $N$  is chosen to be equal to the number of genes to ensure the matrix of initial conditions has full rank. Another issue that we have addressed are the instabilities present in the DMD eigenvalues. Consequently, the observability gramian is not unique and the sum in Eq. (15) diverges to infinity. To mend this issue, we compute the finite-horizon Gram matrix, where the sum in Eq. (13) and Eq. (15) is from 0 to  $m$ . This allows for the computation of the finite-horizon signal energy from Eq. (13) where the bounds on the sum are now from  $i = 0$  to  $i = m$ .

Once  $\mathbf{w}$  is obtained by solving Eq. (14), then measurements  $y_t$ , for  $t$  in  $\{0, 1, \dots, T\}$ , are generated from  $y_t = \mathbf{w}^\top \mathbf{K}^t \bar{\mathbf{z}}_0$  while keeping only the  $q$  elements of  $\mathbf{w}$  with largest magnitude as nonzero. All other elements of  $\mathbf{w}$  are set to zero to simulate the sampling of only selected genes. To reconstruct  $\bar{\mathbf{z}}_0$  using only the measurements, we form the following observability matrix from the known sampling weights,  $\mathbf{w}$  and the dynamics matrix  $\mathbf{K}$

$$\begin{bmatrix} y_0 \\ y_1 \\ y_2 \\ \vdots \\ y_T \end{bmatrix} = \begin{bmatrix} \mathbf{w}^\top \\ \mathbf{w}^\top \mathbf{K} \\ \mathbf{w}^\top \mathbf{K}^2 \\ \vdots \\ \mathbf{w}^\top \mathbf{K}^T \end{bmatrix} \bar{\mathbf{z}}_0 = \mathcal{O}_T \bar{\mathbf{z}}_0 \quad (17)$$

and using the Moore-Penrose pseudoinverse we can obtain an estimate of the initial condition as follows

$$\mathcal{O}_T^\dagger \begin{bmatrix} y_0 \\ y_1 \\ y_2 \\ \vdots \\ y_T \end{bmatrix} = \hat{\mathbf{z}}_0 \approx \bar{\mathbf{z}}_0. \quad (18)$$

Increasing  $q$  while keeping  $T$  constant results in increasing reconstruction accuracy until a critical value of  $q$  such that the reconstruction accuracy plateaus; a similar scenario holds for keeping  $q$  constant and increasing  $T$ . When both  $T$  and  $q$  surpass the critical values, perfect reconstruction may be achieved.

When the computation of the Gram matrix,  $\mathbf{G}$ , is not computationally feasible, as can be the case when the dimensionality of the data are relatively high compared to that of bacterial transcription networks that we are dealing with here, the reduced order dynamics given by DMD can be used to compute an approximation to the leading eigenvalues and eigenvectors. The reduced order  $\tilde{\mathbf{G}}$  is then given by

$$\tilde{\mathbf{G}} = \sum_{i=0}^{\infty} \hat{\mathbf{K}}^i \mathbf{U}^\top \bar{\mathbf{z}}_0 \bar{\mathbf{z}}_0^\top \mathbf{U} \hat{\mathbf{K}}^{i^\top} \quad (19)$$

where  $\hat{\mathbf{K}}$  and  $\mathbf{U}$  are given in Eq. (9). Supplementary Figure 4 shows the approximation of the leading eigenvalues and eigenvectors of  $\mathbf{G}$  by  $\tilde{\mathbf{G}}$ .

## Data availability

The data generated from RNA sequencing are available at GEO Accession GSE200822:

[www.ncbi.nlm.nih.gov/geo/query/acc.cgi?acc=GSE200822](https://www.ncbi.nlm.nih.gov/geo/query/acc.cgi?acc=GSE200822). The DNA sequencing data for the reporter strains and the kinetic data generated from the spectrophotometer are available at: <https://github.com/AqibHasnain/transcriptome-dynamics-dmd-observability>.

## Code availability

All codes used in this study are available at: <https://github.com/AqibHasnain/transcriptome-dynamics-dmd-observability> or available from the author's upon request. The git repo hash key associated with this manuscript is 2aaa256.

## Acknowledgments

This work was supported by DARPA, AFRL under contract numbers FA8750-17-C-0229, HR001117C0092, HR001117C0094, DEAC0576RL01830. Any opinions, findings, conclusions, or recommendations expressed in this material are those of the authors and do not necessarily reflect the views of the Defense Advanced Research Project Agency, the Department of Defense, or the United States government. This work was also funded, in part, by the Department of Energy's Biological and Environmental Research office, under the DOE Scientific Focus Area: Secure Biosystems Design project, via funding from Pacific Northwest National Laboratory subcontract numbers 545157 and 490521. This work received partial funding from the Army Young Investigator Award W911NF-20-1-0165 and the Army Research Office Grants W911NF-19-D-001, W911-NF-19-F-037, and W911-NF-19-0026. We acknowledge the use of the Biological Nanostructures Laboratory within the California NanoSystems Institute, supported by the University of California, Santa Barbara and the University of California, Office of the President. We thank Ryan Chambers, Trevor Marks, and Kirk Fields for construction of the vacuum manifold. We thank Jamiree Harrison for engaging in insightful discussions on linear systems theory.

## Author contributions

A.H. and E.Y. conceived of the project. A.H. designed research and experiments, developed computational and analytical analysis methodologies, performed formal analysis, analyzed data, and wrote the manuscript. S.B. assisted with RNA-seq sample collection and observability analysis. D.M.J. assisted with cloning of reporter strains; J.S. performed the mRNA library prep and sequencing; S.B.H. assisted in conceptualization and designing the time-series RNA-seq experiment; E.Y. supervised research and secured funding. A.H. revised the manuscript with inputs from all authors.

## Competing interests

The authors declare no competing interests.





# Bibliography

- [1] Christopher A Voigt. Genetic parts to program bacteria. *Current opinion in biotechnology*, 17(5):548–557, 2006.
- [2] Luc Bousse. Whole cell biosensors. *Sensors and Actuators B: Chemical*, 34(1-3):270–275, 1996.
- [3] Michael Moraskie, Harun Roshid, Gregory O’Connor, Emre Dikici, Jean-Marc Zingg, Sapna Deo, and Sylvia Daunert. Microbial whole-cell biosensors: Current applications, challenges, and future perspectives. *Biosensors and Bioelectronics*, page 113359, 2021.
- [4] Yizhi Song, Cordelia PN Rampley, Xiaoyu Chen, Fawen Du, Ian P Thompson, and Wei E Huang. Application of bacterial whole-cell biosensors in health. *Handbook of Cell Biosensors*, pages 945–961, 2022.
- [5] Howard Salis, Alvin Tamsir, and Christopher Voigt. Engineering bacterial signals and sensors. *Bacterial Sensing and Signaling*, 16:194–225, 2009.
- [6] Baojun Wang, Mauricio Barahona, and Martin Buck. A modular cell-based biosensor using engineered genetic logic circuits to detect and integrate multiple environmental signals. *Biosensors and Bioelectronics*, 40(1):368–376, 2013.
- [7] Huiqing Chong and Chi Bun Ching. Development of colorimetric-based whole-cell biosensor for organophosphorus compounds by engineering transcription regulator dmpr. *ACS synthetic biology*, 5(11):1290–1298, 2016.
- [8] Brigitta Kurenbach, Delphine Marjoshi, Carlos F Amábile-Cuevas, Gayle C Ferguson, William Godsoe, Paddy Gibson, and Jack A Heinemann. Sublethal exposure to commercial formulations of the herbicides dicamba, 2, 4-dichlorophenoxyacetic acid, and glyphosate cause changes in antibiotic susceptibility in escherichia coli and salmonella enterica serovar typhimurium. *MBio*, 6(2):e00009–15, 2015.
- [9] Eric VanArsdale, Chen-yu Tsao, Yi Liu, Chen-yu Chen, Gregory F Payne, and William E Bentley. Redox-based synthetic biology enables electrochemical detection of the herbicides dicamba and roundup via rewired escherichia coli. *ACS sensors*, 4(5):1180–1184, 2019.
- [10] Yang-Chun Yong and Jian-Jiang Zhong. A genetically engineered whole-cell pigment-based bacterial biosensing system for quantification of n-butyryl homoserine lactone quorum sensing signal. *Biosensors and Bioelectronics*, 25(1):41–47, 2009.
- [11] J Christopher Anderson, Elizabeth J Clarke, Adam P Arkin, and Christopher A Voigt. Environmentally controlled invasion of cancer cells by engineered bacteria. *Journal of molecular biology*, 355(4):619–627, 2006.
- [12] Tal Danino, Arthur Prindle, Gabriel A Kwong, Matthew Skalak, Howard Li, Kaitlin Allen, Jeff Hasty, and Sangeeta N Bhatia. Programmable probiotics for detection of cancer in urine. *Science translational medicine*, 7(289):289ra84–289ra84, 2015.
- [13] Juan Ibero, Beatriz Galán, and José L García. Identification of the edcr estrogen-dependent repressor in caenibius tardaugens nbrc 16725: Construction of a cellular estradiol biosensor. *Genes*, 12(12):1846, 2021.
- [14] Chloé Grazon, R C Baer, Uroš Kuzmanović, Thuy Nguyen, Mingfu Chen, Marjon Zamani, Margaret Chern, Patricia Aquino, Xiaoman Zhang, Sébastien Lecommandoux, et al. A progesterone biosensor derived from microbial screening. *Nature communications*, 11(1):1–10, 2020.
- [15] Xinyi Wan, Behide Saltepe, Luyang Yu, and Baojun Wang. Programming living sensors for environment, health and biomanufacturing. *Microbial biotechnology*, 2021.
- [16] Michael I Love, Wolfgang Huber, and Simon Anders. Moderated estimation of fold change and dispersion for rna-seq data with deseq2. *Genome biology*, 15(12):1–21, 2014.
- [17] Mark D Robinson, Davis J McCarthy, and Gordon K Smyth. edgeR: a bioconductor package for differential expression analysis of digital gene expression data. *Bioinformatics*, 26(1):139–140, 2010.
- [18] Nicholas J Schurch, Pietá Schofield, Marek Gierliński, Christian Cole, Alexander Sherstnev, Vijender Singh, Nicola Wrobel, Karim Gharbi, Gordon G Simpson, Tom Owen-Hughes, et al. How many biological replicates are needed in an rna-seq experiment and which differential expression tool should you use? *Rna*, 22(6):839–851, 2016.
- [19] Juliana Costa-Silva, Douglas Domingues, and Fabricio Martins Lopes. Rna-seq differential expression analysis: An extended review and a software tool. *PLoS one*, 12(12):e0190152, 2017.
- [20] Jonathan M Raser and Erin K O’shea. Noise in gene expression: origins, consequences, and control. *Science*, 309(5743):2010–2013, 2005.
- [21] Sipko Van Dam, Urmo Vosa, Adriaan van der Graaf, Lude Franke, and Joao Pedro de Magalhaes. Gene co-expression analysis for functional classification and gene–disease predictions. *Briefings in bioinformatics*, 19(4):575–592, 2018.
- [22] Timothy S Gardner, Diego Di Bernardo, David Lorenz, and James J Collins. Inferring genetic networks and identifying compound mode of action via expression profiling. *Science*, 301(5629):102–105, 2003.
- [23] Heming Xing and Timothy S Gardner. The mode-of-action by network identification (mni) algorithm: a network biology approach for molecular target identification. *Nature protocols*, 1(6):2551–2554, 2006.
- [24] Diego di Bernardo, Michael J Thompson, Timothy S Gardner, Sarah E Chobot, Erin L Eastwood, Andrew P Wojtovich, Sean J Elliott, Scott E Schaus, and James J Collins. Chemogenomic profiling on a genome-wide scale using reverse-engineered gene networks. *Nature biotechnology*, 23(3):377–383, 2005.
- [25] Jeremiah J Faith, Boris Hayete, Joshua T Thaden, Iaria Mogno, Jamey Wierzbowski, Guillaume Cottarel, Simon Kasif, James J Collins, and Timothy S Gardner. Large-scale mapping and validation of escherichia coli transcriptional regulation from a compendium of expression profiles. *PLoS biology*, 5(1):e8, 2007.
- [26] Michael E Driscoll and Timothy S Gardner. Identification and control of gene networks in living organisms via supervised and unsupervised learning. *Journal of Process Control*, 16(3):303–311, 2006.

- [27] Brian DO Anderson and John B Moore. *Optimal filtering*. Courier Corporation, 2012.
- [28] Donald J Chmielewski, Tasha Palmer, and Vasilios Manousiouthakis. On the theory of optimal sensor placement. *AICHE journal*, 48(5):1001–1012, 2002.
- [29] Joao P Hespanha. *Linear systems theory*. Princeton university press, 2018.
- [30] Vera-Khlara S Oh and Robert W Li. Temporal dynamic methods for bulk rna-seq time series data. *Genes*, 12(3):352, 2021.
- [31] Tiziana Sanavia, Francesca Finotello, and Barbara Di Camillo. Funpat: function-based pattern analysis on rna-seq time series data. *BMC genomics*, 16(6):1–13, 2015.
- [32] Ian C McDowell, Dinesh Manandhar, Christopher M Vockley, Amy K Schmid, Timothy E Reddy, and Barbara E Engelhardt. Clustering gene expression time series data using an infinite gaussian process mixture model. *PLoS computational biology*, 14(1):e1005896, 2018.
- [33] Vân Anh Huynh-Thu and Pierre Geurts. dyngenie3: dynamical genie3 for the inference of gene networks from time series expression data. *Scientific reports*, 8(1):1–12, 2018.
- [34] Atte Aalto, Lauri Viitasaari, Pauliina Ilmonen, Laurent Mombaerts, and Jorge Gonçalves. Gene regulatory network inference from sparsely sampled noisy data. *Nature communications*, 11(1):1–9, 2020.
- [35] Peter J Schmid. Dynamic mode decomposition of numerical and experimental data. *Journal of fluid mechanics*, 656:5–28, 2010.
- [36] Clarence W Rowley, Igor Mezic, Shervin Bagheri, Philipp Schlatter, Dans Henningson, et al. Spectral analysis of nonlinear flows. *Journal of fluid mechanics*, 641(1):115–127, 2009.
- [37] Jonathan H Tu. *Dynamic mode decomposition: Theory and applications*. PhD thesis, Princeton University, 2013.
- [38] Milena Anguelova. *Observability and identifiability of nonlinear systems with applications in biology*. Chalmers Tekniska Hogskola (Sweden), 2007.
- [39] Aqib Hasnain, Nibodh Boddupalli, and Enoch Yeung. Optimal reporter placement in sparsely measured genetic networks using the koopman operator. In *2019 IEEE 58th Conference on Decision and Control (CDC)*, pages 19–24. IEEE, 2019.
- [40] Peter Flessel, PJE Quintana, and Kim Hooper. Genetic toxicity of malathion: a review. *Environmental and molecular mutagenesis*, 22(1):7–17, 1993.
- [41] WN Aldridge, JW Miles, DL Mount, and RD Verschoyle. The toxicological properties of impurities in malathion. *Archives of toxicology*, 42(2):95–106, 1978.
- [42] I Desi, Gy Dura, L Gönczi, Zs Kneffel, A Strohmayer, and Z Szabo. Toxicity of malathion to mammals, aquatic organisms and tissue culture cells. *Archives of environmental contamination and toxicology*, 3(4):410–425, 1975.
- [43] Jewell D Wilson. *Toxicological profile for malathion*. Agency for Toxic Substances and Disease Registry, 2003.
- [44] Muhammad Syafrudin, Risky Ayu Kristanti, Adhi Yuniarto, Tony Hadibarata, Jongtae Rhee, Wedad A Al-Onazi, Tahani Saad Algarni, Abdulhadi H Almarri, and Amal M Al-Mohaimed. Pesticides in drinking water—a review. *International Journal of Environmental Research and Public Health*, 18(2):468, 2021.
- [45] Bryson D Bennett, Elizabeth H Kimball, Melissa Gao, Robin Osterhout, Stephen J Van Dien, and Joshua D Rabinowitz. Absolute metabolite concentrations and implied enzyme active site occupancy in escherichia coli. *Nature chemical biology*, 5(8):593–599, 2009.
- [46] KayLynn Newhart. Environmental fate of malathion. *California Environmental Protection Agency*, 11:1–20, 2006.
- [47] Robert W Jackson, Gail M Preston, and Paul B Rainey. Genetic characterization of pseudomonas fluorescens sbw25 rsp gene expression in the phytosphere and in vitro. *Journal of bacteriology*, 187(24):8477–8488, 2005.
- [48] Ana Conesa, Pedro Madrigal, Sonia Tarazona, David Gomez-Cabrero, Alejandra Cervera, Andrew McPherson, Michał Wojciech Szcześniak, Daniel J Gaffney, Laura L Elo, Xuegong Zhang, et al. A survey of best practices for rna-seq data analysis. *Genome biology*, 17(1):1–19, 2016.
- [49] Bingni W Brunton, Lise A Johnson, Jeffrey G Ojemann, and J Nathan Kutz. Extracting spatial-temporal coherent patterns in large-scale neural recordings using dynamic mode decomposition. *Journal of neuroscience methods*, 258:1–15, 2016.
- [50] Shara Balakrishnan, Aqib Hasnain, Nibodh Boddupalli, Dennis M Joshy, Robert G Egbert, and Enoch Yeung. Prediction of fitness in bacteria with causal jump dynamic mode decomposition. In *2020 American Control Conference (ACC)*, pages 3749–3756. IEEE, 2020.
- [51] Lawrence Sirovich. A novel analysis of gene array data: yeast cell cycle. *Biology Methods and Protocols*, 5(1):bpaa018, 2020.
- [52] Jake P Taylor-King, Asbjørn N Riseth, Will Macnair, and Manfred Claassen. Dynamic distribution decomposition for single-cell snapshot time series identifies subpopulations and trajectories during ipsc reprogramming. *PLoS computational biology*, 16(1):e1007491, 2020.
- [53] Aqib Hasnain, Subhrajit Sinha, Yuval Dorfan, Amin Espah Borujeni, Yongjin Park, Paul Maschhoff, Uma Saxena, Joshua Urrutia, Niall Gaffney, Diveena Becker, et al. A data-driven method for quantifying the impact of a genetic circuit on its host. In *2019 IEEE Biomedical Circuits and Systems Conference (BioCAS)*, pages 1–4. IEEE, 2019.
- [54] Orly Alter, Patrick O Brown, and David Botstein. Singular value decomposition for genome-wide expression data processing and modeling. *Proceedings of the National Academy of Sciences*, 97(18):10101–10106, 2000.
- [55] Justin Tan, Anand V Sastry, Karoline S Fremming, Sara P Bjørn, Alexandra Hoffmeyer, Sangwoo Seo, Bjørn G Voldborg, and Bernhard O Palsson. Independent component analysis of e. coli’s transcriptome reveals the cellular processes that respond to heterologous gene expression. *Metabolic Engineering*, 61:360–368, 2020.
- [56] Enoch Yeung, Soumya Kundu, and Nathan Hodas. Learning deep neural network representations for koopman operators of nonlinear dynamical systems. In *2019 American Control Conference (ACC)*, pages 4832–4839. IEEE, 2019.
- [57] Yang-Yu Liu, Jean-Jacques Slotine, and Albert-Laszlo Barabasi. Observability of complex systems. *Proceedings of the National Academy of Sciences*, 110(7):2460–2465, 2013.
- [58] Chi-Tsong Chen. *Linear system theory and design*. Saunders college publishing, 1984.
- [59] Didier Georges. The use of observability and controllability gramians or functions for optimal sensor and actuator location in finite-dimensional systems. In *Proceedings of 1995 34th IEEE conference on decision and control*, volume 4, pages 3319–3324. IEEE, 1995.
- [60] PC Müller and HI Weber. Analysis and optimization of certain qualities of controllability and observability for linear dynamical systems. *Automatica*, 8(3):237–246, 1972.
- [61] Athanasios C Antoulas. *Approximation of large-scale dynamical systems*. SIAM, 2005.
- [62] Jason Ernst, Oded Vainas, Christopher T Harbison, Itamar Simon, and Ziv Bar-Joseph. Reconstructing dynamic regulatory maps. *Molecular systems biology*, 3(1):74, 2007.
- [63] The gene ontology resource: enriching a gold mine. *Nucleic Acids Research*, 49(D1):D325–D334, 2021.

- [64] Anton Khmelinskii, Philipp J Keller, Anna Bartosik, Matthias Meurer, Joseph D Barry, Balca R Mardin, Andreas Kaufmann, Susanne Trautmann, Malte Wachsmuth, Gislene Pereira, et al. Tandem fluorescent protein timers for in vivo analysis of protein dynamics. *Nature biotechnology*, 30(7):708–714, 2012.
- [65] Uri Alon. *An introduction to systems biology: design principles of biological circuits*. CRC press, 2019.
- [66] Shara Balakrishnan, Aqib Hasnain, Robert Egbert, and Enoch Yeung. Data-driven observability decomposition with koopman operators for optimization of output functions of nonlinear systems. *arXiv preprint arXiv:2210.09343*, 2022.
- [67] Anthony M Bolger, Marc Lohse, and Bjoern Usadel. Trimmomatic: a flexible trimmer for illumina sequence data. *Bioinformatics*, 30(15):2114–2120, 2014.
- [68] Nicolas L Bray, Harold Pimentel, Páll Melsted, and Lior Pachter. Near-optimal probabilistic rna-seq quantification. *Nature biotechnology*, 34(5):525–527, 2016.
- [69] Geo Pertea and Mihaela Pertea. Gff utilities: Gffread and gffcompare. *F1000Research*, 9, 2020.
- [70] Alon Zaslaver, Anat Bren, Michal Ronen, Shalev Itzkovitz, Ilya Kikoin, Seagull Shavit, Wolfram Liebermeister, Michael G Surette, and Uri Alon. A comprehensive library of fluorescent transcriptional reporters for escherichia coli. *Nature methods*, 3(8):623–628, 2006.
- [71] Carola Engler, Romy Kandzia, and Sylvestre Marillonnet. A one pot, one step, precision cloning method with high throughput capability. *PLoS one*, 3(11):e3647, 2008.
- [72] Igor Mezić. Spectral properties of dynamical systems, model reduction and decompositions. *Nonlinear Dynamics*, 41(1):309–325, 2005.
- [73] Subhrajit Sinha, Bowen Huang, and Umesh Vaidya. On robust computation of koopman operator and prediction in random dynamical systems. *Journal of Nonlinear Science*, 30(5):2057–2090, 2020.

| Malathion reporter                      | Locus tag  | Molecular function                                                                                                                                                | Act./Rep. | $y_{\min}$ | $y_{\max}$ | $K_M$ | n   |
|-----------------------------------------|------------|-------------------------------------------------------------------------------------------------------------------------------------------------------------------|-----------|------------|------------|-------|-----|
| atpB                                    | PFLU_6124  | <ul style="list-style-type: none"> <li>proton-transporting ATP synthase activity, rotational mechanism</li> </ul>                                                 | Activated | 1467       | 1783       | 0.6   | 4.5 |
| petA                                    | PFLU_0841  | <ul style="list-style-type: none"> <li>2 iron, 2 sulfur cluster binding,</li> <li>metal ion binding</li> <li>ubiquinol-cytochrome-c reductase activity</li> </ul> | Activated | 853        | 1125       | 1.4   | 2.4 |
| sucC                                    | PFLU_1823  | <ul style="list-style-type: none"> <li>ATP binding</li> <li>magnesium ion binding</li> <li>succinate-CoA ligase activity</li> </ul>                               | Activated | 257        | 337        | 0.2   | 1.9 |
| rpoA                                    | PFLU_5502  | <ul style="list-style-type: none"> <li>DNA binding</li> <li>protein dimerization activity</li> <li>DNA-directed 5'-3' RNA polymerase activity</li> </ul>          | Activated | 1256       | 1542       | 0.9   | 3.0 |
| fabA                                    | PFLU_1836  | <ul style="list-style-type: none"> <li>dehydratase activity</li> <li>isomerase activity</li> </ul>                                                                | Activated | 292        | 373        | 0.2   | 1.1 |
| anti-sigma 28 factor                    | PFLU_4736  | <ul style="list-style-type: none"> <li>Negative regulator of flagellin synthesis</li> </ul>                                                                       | Activated | 339        | 535        | 0.7   | 1.5 |
| Uncharacterized protein I               | PFLU_3761  |                                                                                                                                                                   | Activated | 2465       | 3110       | 0.5   | 2.7 |
| cspA2                                   | PFLU_4150  | <ul style="list-style-type: none"> <li>major cold shock protein</li> </ul>                                                                                        | Activated | 706        | 1186       | 1.5   | 5.3 |
| Putative ABC transport protein          | PFLU_0376  | <ul style="list-style-type: none"> <li>ligand-gated ion channel activity</li> </ul>                                                                               | Activated | 584        | 1083       | 1.0   | 2.0 |
| gltA                                    | PFLU_1815  | <ul style="list-style-type: none"> <li>citrate (Si)-synthase activity</li> </ul>                                                                                  | Activated | 238        | 458        | 0.9   | 1.9 |
| lpxC                                    | PFLU_0953  | <ul style="list-style-type: none"> <li>metal ion binding</li> <li>deacetylase activity</li> </ul>                                                                 | Activated | 1017       | 2418       | 0.4   | 7.4 |
| Uncharacterized protein II              | PFLU_1358  |                                                                                                                                                                   | Repressed | 1073       | 3387       | 0.3   | 1.9 |
| capB                                    | PFLU_1302A | <ul style="list-style-type: none"> <li>cold shock protein</li> </ul>                                                                                              | Repressed | 9616       | 10543      | 0.9   | 2.9 |
| Putative outer membrane porin A protein | PFLU_4612  | <ul style="list-style-type: none"> <li>porin activity</li> </ul>                                                                                                  | Activated | 642        | 1172       | 0.6   | 1.5 |
| acrA                                    | PFLU_1380  | <ul style="list-style-type: none"> <li>transmembrane transporter activity</li> </ul>                                                                              | Activated | 354        | 682        | 0.9   | 2.9 |

Table 1: Sensor promoter library metadata and transfer curve parameters for the fitted Hill equations in Fig. 4d.
