# Learning transcriptome dynamics for discovery of optimal genetic reporters of novel compounds

Aqib Hasnain<sup>\*1</sup>, Shara Balakrishnan<sup>2</sup>, Dennis M. Joshy<sup>1</sup>, Steven B. Haase<sup>3</sup>, Jen Smith<sup>4</sup>, and Enoch Yeung<sup>1</sup>

<sup>1</sup>Department of Mechanical Engineering, University of California Santa Barbara

<sup>2</sup>Department of Electrical and Computer Engineering, University of California Santa Barbara

<sup>4</sup>California Nanosystems Institute, University of California Santa Barbara

<sup>3</sup>Department of Biology, Duke University

## Abstract

1 Accelerating the design of synthetic biological circuits requires  
2 expanding the currently available genetic toolkit. Although  
3 whole-cell biosensors have been successfully engineered and de-  
4 ployed, particularly in applications such as environmental and  
5 medical diagnostics, novel sensing applications necessitate the  
6 discovery and optimization of novel biosensors. Here, we ad-  
7 dress this issue of the limited repertoire of biosensors by de-  
8 veloping a data-driven, transcriptome-wide approach to discover  
9 perturbation-inducible genes from time-series RNA sequencing  
10 data, guiding the design of synthetic transcriptional reporters.  
11 By combining techniques from dynamical systems and control  
12 theory, we show that high-dimensional transcriptome dynamics  
13 can be efficiently represented and used to rank genes based on  
14 their ability to report the perturbation-specific cell state. We  
15 extract, construct, and validate 15 functional biosensors for the  
16 organophosphate malathion in the underutilized host organism  
17 *Pseudomonas fluorescens* SBW25, provide a computational ap-  
18 proach to aggregate individual biosensor responses to facilitate  
19 enhanced reporting, and exemplify their ability to be useful out-  
20 side the lab by detecting malathion in the environment. The  
21 library of living malathion sensors can be optimized for use in  
22 environmental diagnostics while the developed machine learning  
23 tool can be applied to discover perturbation-inducible gene ex-  
24 pression systems in the compendium of host organisms.

## 25 Introduction

26 The aim of synthetic biology is to design and construct living  
27 systems to possess desired functionality; this is done by devel-  
28 oping, characterizing, and assembling biological parts in cells,  
29 creating living devices [1]. Synthetic biological circuits were first  
30 engineered in the year 2000 when Gardner et al. [2] constructed  
31 a two-node genetic bistable switch and Elowitz and Leibler [3]  
32 constructed a three-node genetic oscillator (known as the re-  
33 pressilator), paving the way for fine-tuned control of gene ex-  
34 pression. Since, notable breakthroughs have emerged in post-  
35 transcriptional and translational control [4–6], optogenetic con-  
36 trol [7], eventually leading to control of metabolic pathways [8,9]  
37 and neural-like computing [10]. Although the aforementioned

genetic circuits exhibit distinct behavior, their design is imple- 38  
mented with a shared set of biomolecular parts, limiting the range 39  
of functionality that can be achieved. 40

As was the case for the genetic switch and repressilator, much 41  
of the engineering workflow for optimizing the design of genetic 42  
circuits has relied on iteratively replacing parts to minimize dis- 43  
crepancies between actual and desired behavior [11–13]. By 44  
parts, we are referring to DNA sequences which comprise the ele- 45  
mentary building blocks of genetic circuits; for example, protein- 46  
coding genes, promoters, terminators, and ribosome binding sites 47  
to name only a few [12]. The initial pool of parts that were cu- 48  
rated for use by synthetic biologists in bottom-up design were 49  
largely derived from *E. coli* and since has expanded into a li- 50  
brary containing parts from a diverse set of microorganisms, from 51  
bacteriophage [14] to yeast [15]. 52

The expansion of the genetic toolkit for circuit design remains 53  
an ongoing challenge as substantial effort is required to mine, de- 54  
sign, characterize, and optimize biological parts [16–20]. While 55  
a significant amount of attention has been placed on optimiz- 56  
ing and characterizing existing biological parts for genetic cir- 57  
cuit design, less attention has been placed on mining biological 58  
parts. This has resulted in much needed insulation and biolog- 59  
ical orthogonalization strategies [21] for mitigating inadvertent 60  
intra-circuit and inter-circuit-host interactions. Moreover, pro- 61  
grammatic tools have been developed to automate the design of 62  
genetic circuits that implement logical operations using a set of 63  
well-characterized parts in model organisms [22–25]. However, 64  
since biological parts and circuits are characterized and opti- 65  
mized within a single model organism and often not evaluated 66  
in application relevant organisms, there is no guarantee that the 67  
parts can be “taken off the shelf” for use in engineering novel 68  
host organisms. An increased focus on mining biological parts 69  
from novel host organisms will provide an expansion of the ex- 70  
isting genetic toolkit from which synthetic biologists can browse 71  
and select from. 72

Transcriptional genetic sensors are a class of biological compo- 73  
nents that control the activity of promoters [26] and have been 74  
used to construct whole-cell (living) biosensors [27–29]. A large 75  
portion of transcriptional sensors rely on transcription factor- 76  
promoter pairs [30] and have been used in whole-cell biosens- 77  
ing for detection of heavy metals [31], pesticides and herbicides 78  
[32–34], waterborne pathogens [35], disease biomarkers [36, 37], 79  
and many more applications discussed in [38]. Since microbes are 80  
found in virtually all terrestrial environments, one could imagine 81

\*Please address correspondence to [aqib@ucsb.edu](mailto:aqib@ucsb.edu)

that there would be no shortage of transcriptional genetic sensors for novel sensing applications. However, given a novel sensing application for a target compound or perturbation, transcriptional genetic sensors are typically unknown *a priori*. Moreover, a complete methodology for discovering sensors for the target analyte in novel organisms does not yet exist.

The transcriptional activity of an organism can be measured through RNA sequencing (RNA-seq) to produce a snapshot of the bulk cell state subject to intrinsic and extrinsic perturbations. The typical approach for identifying upregulated and downregulated genes across experimental conditions is to apply differential expression analysis [39, 40]. A major pitfall with differential expression analysis is its lack of statistical power when faced with a sparse number of biological replicates. That is to say that the false-positive rate increases drastically when only a small number of biological replicates are available [41] as is often the case due to the costliness of RNA-seq. A related issue arises in that one must sacrifice time points for biological replicates, reducing the fidelity of the dynamical process being studied. As most biological processes are dynamic, time-series profiles are essential for accurate modeling of these processes. Furthermore, differential expression analysis provides no information beyond which genes are upregulated/downregulated [42]. An analysis of expression dynamics provides a potential route to design a sensing scheme for a target analyte for which no single sensor exists.

A typical RNA-seq dataset contains hundreds to tens of thousands of genes; despite that, a subset of genes, which we call *encoder genes*, are typically sufficient for representing the underlying biological variation in the dataset. This is explained by the fact that variations in many genes are not due to the biological process of interest [43] and that many genes have correlated expression levels [44]. The task of identifying a subset of the state (genes) which recapitulate the entire state (transcriptome/cell state) and explain the variations of interest is well studied in the field of dynamics and controls in the form of optimal filtering and sensor placement [45, 46]. In the context of dynamic transcriptional networks, sensor placement is concerned with inferring the underlying cell state based on minimal measurements; this introduces the concept of observability of a dynamical system [47]. The transcriptome is observable if it can be reconstructed from the subset of genes that have been measured. In other words, these genes *encode* the required information to predict the dynamics of the entire transcriptome. Hence the name, *encoder genes*. To the best of our knowledge, measures of observability have not been applied to genetic networks to identify genetic sensors, biomarkers, or other key genes.

Overall, a systematic approach for identifying genetic sensors from RNA-seq datasets is still an open and challenging issue. In this work, we develop a machine learning methodology to extract numerous endogenous biological sensors for analytes of interest from time-series gene expression data (Figure 1). Our approach consists of three key steps, each of which is depicted in the middle panel of Figure 1. Briefly, the first step adapts dynamic mode decomposition (DMD) [48–50] to learn the transcriptome dynamics from time-series RNA-seq data. Beyond the scope of sensor discovery, we show how the dynamic modes can be utilized to cluster genes by their temporal response. The second step involves assigning sampling weights to each gene that quantify the contribution to maximizing observability of the cell state [47, 51, 52]. The sampling weights provide a machine learned ranking of the genes based on their contribution to observability of the system, and using this ranking, encoder genes may be selected. To ensure the ranking is identifying genes which can recapitulate the cell state, the final step is to measure how well a chosen subset of genes can

reconstruct the cell state. To validate our proposed methodology, we use our method to generate a library of 15 synthetic genetic reporters for the pesticide malathion [53–55], an organophosphate commonly used for insect control, in the bacterium *Pseudomonas fluorescens* SBW25. The library is composed of encoder genes identified by our proposed machine learning methodology. The transcriptional sensors play distinct biological roles in their host and exhibit unique malathion response curves. Our method uses no prior knowledge of genes involved in malathion sensing or metabolism. Moreover, we use no data source beyond RNA-seq, thereby providing a cost and computationally efficient approach for transcriptional sensor identification.

## Results

**Induction of malathion elicits fast host response.** To start, we will first introduce the time-series RNA-seq dataset that we will use throughout this work. The transcriptional activation and repression of the soil microbe *Pseudomonas fluorescens* SBW25 was induced by malathion at a molar concentration of  $1.29 \mu\text{M}$  ( $425 \text{ ng}/\mu\text{L}$ ) for the following two reasons: i) it is a moderate amount that can typically be found in streams and ground water after recent pesticide use based on studies done in the United States, Malaysia, China, Japan, and India [56, 57], and ii) the characteristic concentration of a metabolite in bacteria is on the order of  $0.1 - 10 \mu\text{M}$  [58]. Malathion is an organophosphorus synthetic insecticide used mainly in agricultural settings [59] while SBW25 is a strain of bacteria that colonizes soil, water, and plant surface environments [60]. This makes the soil-dwelling strain a prime candidate for identification of transcriptional genetic sensors for the detection of malathion.

To enable rapid harvesting and instantaneous freezing of cell cultures, we made use of a custom-built vacuum manifold, enabling fast arrest of transcriptional dynamics (Supplementary Figure 6 and Methods). Following malathion induction, cells were harvested at 10 minute intervals for 80 minutes, obtaining a total of 9 time points across two biological replicates that were sequenced. As the focus of our study is on identifying trends and correlations across time, we heavily favored time points in the trade-off between time points and biological replicates. To identify candidate sensor genes for malathion induction and subsequently build synthetic transcriptional reporters, we also collected samples from a cell culture that was not induced with malathion. See the Methods section for further details on cell culturing and harvesting.

RNA sequencing (RNA-seq) provides a snapshot of the entire transcriptome i.e. the presence and quantity of RNA in a sample at a given moment in time. In this work, we examine the fold change response given by first normalizing the raw counts to obtain transcripts per million (TPM) [61] followed by calculating the fold change of the malathion condition with respect to the negative control. The implication is that the fold change is the cell state,  $\mathbf{z}_k$  for some time point  $k$ , we are concerned with for discovery of genetic sensors. Of the nearly 6000 known genes in the SBW25 genome, a large fraction of them were not expressed at significant levels. Specifically, only 10% of or 624 genes are kept for modeling and analysis due to their relatively high abundance.

Given our goal of extracting salient biosensors from time-series gene expression data, we first model the dynamical process that is driven by the input of malathion on the SBW25 transcriptome. We consider malathion as a step input to the cell culture and as an impulse to the cells. This is motivated by the fact that biomolecular systems often respond to the *derivative* of the input and not the input itself (e.g. the absolute concentration

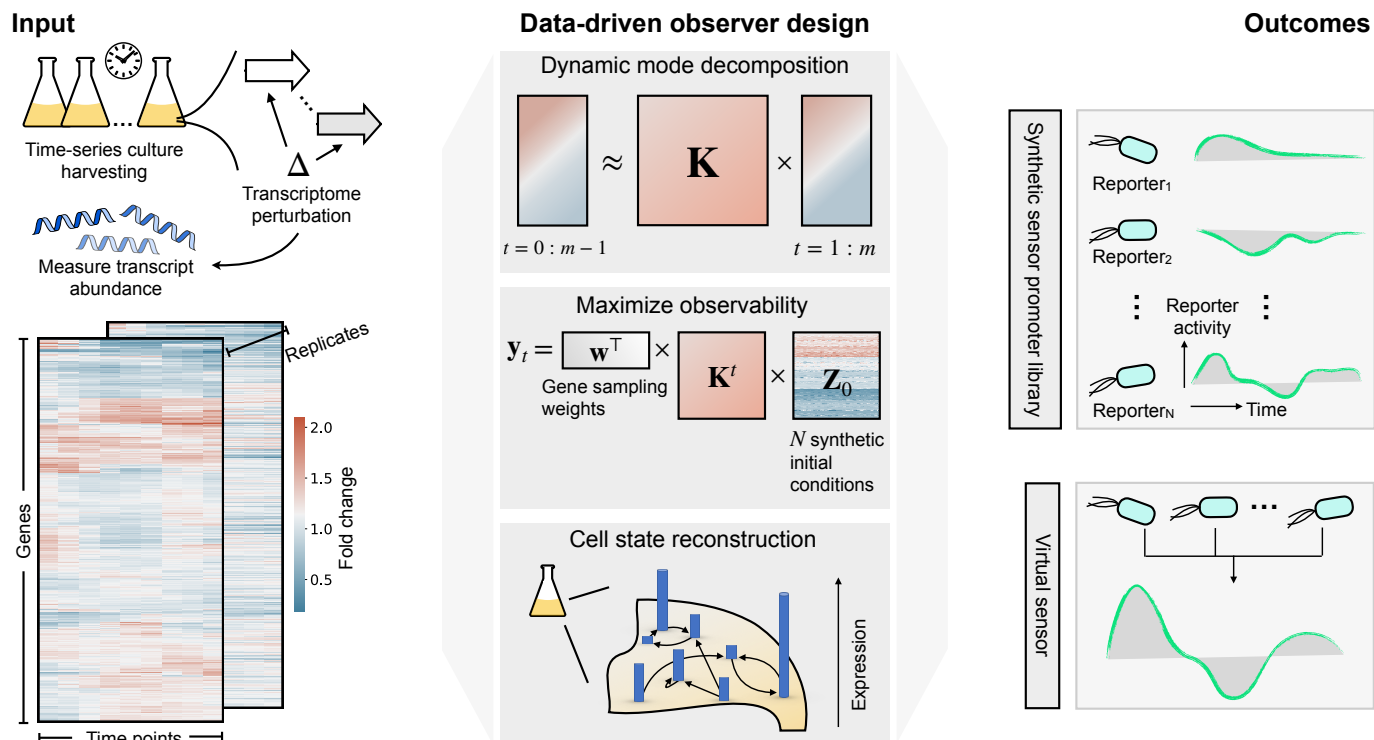

Figure 1: **Transcriptional genetic sensors underlying the response from environmental perturbations can be extracted using data-driven sensor placement.** Bulk RNA sequencing (RNA-seq) measures transcript abundance over time following transcriptome perturbations. Our method starts by applying dynamic mode decomposition (DMD) to the fold change response to discover dynamic modes which govern the evolution of the cell state. The dynamic modes are used to design a state observer (gene sampling weights) that maximizes the observability of the transcriptome dynamics. Measurements from a subset of genes (*encoder genes*) informed by the gene sampling weights are then used to reconstruct the cell state. Our method returns: 1) a dynamics matrix (or equivalently, a set of dynamic modes) describing how expression of gene  $i$  at time  $t$  is impacted by gene  $j$  and time  $t - 1$ , and 2) gene sampling weights. The outcome, demonstrated in this work, is a library of synthetic sensor promoters (genetic reporters) that are used to detect an analyte of interest. Since each genetic reporter has a unique response to the same perturbation, the library can be artificially fused to produce a purely virtual sensor for enhanced reporting.

of malathion) [62, 63]. In the next section, we apply dynamic mode decomposition (DMD) to approximate the fold change response with a sparse collection of dynamic modes. Specifically, we demonstrate how DMD can accurately describe gene expression dynamics by decomposing the time-series gene expression into temporally relevant patterns.

#### Dynamic mode decomposition uncovers modes of host cell response.

Dynamic mode decomposition (DMD) is a time-series dimensionality reduction algorithm that was developed in the fluid dynamics community to extract coherent structures and reconstruct dynamical systems from high-dimensional data [48]. Recently, several works have adapted and applied DMD to biological systems in various contexts [64–68], choosing DMD for its ability to i) reproduce dynamic data over traditionally static methods such as principal component [69] or independent component analysis [70] and ii) represent the dynamics of high-dimensional processes (e.g. gene interaction networks) using only a relatively small number of modes.

To uncover the diverse modes of the host cell response to malathion induction, we performed (exact) DMD [50] on the transcriptomic dataset (see Methods for the details). Specifically, we perform DMD on the standardized fold change, defined as  $\bar{z}_g = x_g^{\text{malathion}} / x_g^{\text{control}}$ , where  $x_g$  is the expression (in TPM) of gene  $g$  and the overbar represents a variable which is trans-

formed to have zero mean and unit variance. DMD allows the learning of low-dimensional linear models from high-dimensional time-series data. Briefly, this implies that quantitative features of a nonlinear model are not captured in our model, e.g. multiple equilibria, and chaos. If these nonlinear features are relevant to the system being studied, one can extend DMD to capture arbitrary nonlinearities, at the cost of needing a larger number of samples [71]. In this section we will describe how modeling the fold change response with DMD enables the identification of biologically relevant temporal patterns that are driven by the malathion perturbation. In the following sections we will show that the modes of the fold-change response will allow us to identify genes which act as reporters for the malathion specific response.

DMD captures transcriptome dynamics by decomposing a gene expression matrix (genes  $\times$  time points) into dynamic modes — each mode characterizes damped, forced, and unforced sinusoidal behavior. Namely, each dynamic mode is associated with a growth or decay rate and a fixed frequency of oscillation. The reconstruction of the impulse response of the fold change dynamics is schematically represented in Figure 2a. The heatmap  $\mathbf{V}$  represents the matrix of 10 learned dynamic modes, each of which has rate of growth or decay and oscillation frequency given by a single corresponding DMD eigenvalue in  $\mathbf{\Lambda}$ , and mode amplitude given in  $\mathbf{b}$ . As they are complex-valued, the magnitude and

233  
234  
235  
236  
237  
238  
239  
240  
241  
242  
243  
244  
245  
246  
247  
248  
249  
250  
251  
252  
253  
254  
255  
256  
257

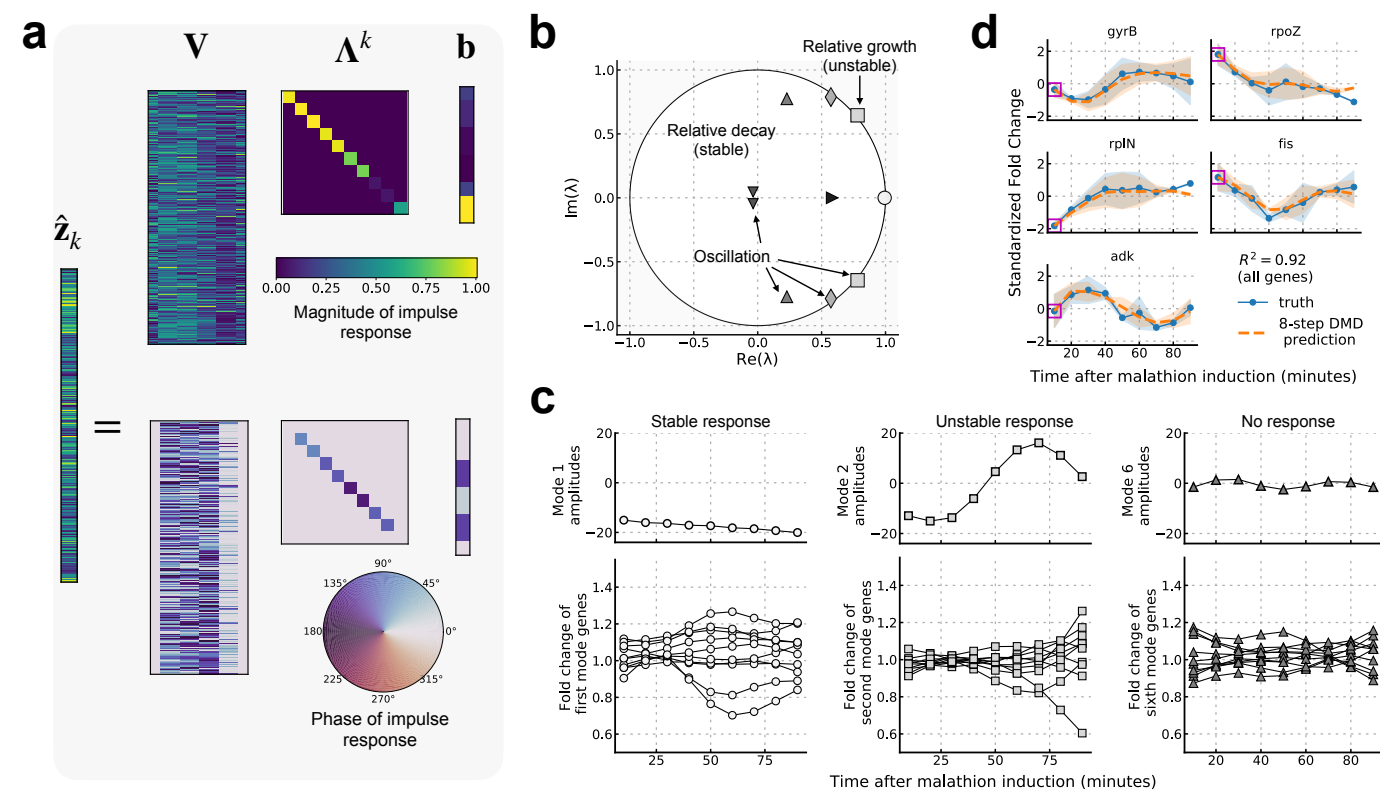

**Figure 2: Dynamic mode decomposition provides an interpretable and predictive model of gene expression dynamics.** (a) DMD reconstruction of the fold change dynamics subject to an impulse input of malathion. Since the modes are complex-valued, their magnitude and phase are separately visualized. The vector  $\hat{z}_k$  is the reconstruction of the fold change at time  $k$ , given by the depicted spectral decomposition where  $V$  are the DMD modes,  $\Lambda$  are the DMD eigenvalues, and  $b$  are the mode amplitudes (see Methods for detailed description of DMD). (b) The DMD spectrum reveals the growth, decay, and oscillation of each of the 10 dynamic modes that comprise the transcriptomic dataset. Each marker is an eigenvalue, and its diameter is proportional to the magnitude of the corresponding dynamic mode. Eigenvalues inside the unit circle correspond to decaying dynamics, eigenvalues with nonzero imaginary part correspond to oscillatory dynamics, and eigenvalues outside the unit circle correspond to growing dynamics. (c) The eigenvalue scaled amplitudes,  $\lambda_i^k b_i$ , of modes 1, 2, and 6 are visualized (upper) along with the 10 genes whose dynamics are most impacted by each of the modes (lower). The marker used for each mode indicates which eigenvalue it corresponds with in (b). (d) The eight-step prediction is visualized for five randomly selected genes in the transcriptomic dataset. The error bars represent the sample standard deviation across two biological replicates (blue solid curve) and across predictions (orange dashed curve). Magenta squares overlapping each gene's initial condition are indicating the data that is provided to make predictions. The coefficient of determination,  $R^2$ , for the eight-step prediction across all genes is computed to be 0.92.

258 phase of each DMD mode, eigenvalue, and amplitude is visualized separately. The magnitude of each DMD mode represents  
 259 gene-wise coherent activation while the phase represents the relative shift of this activation for the damped (or forced) modes.  
 260 Here 10 modes are chosen as it is a minimal set of modes that can accurately capture the dynamics while also limiting the presence  
 261 of instabilities in the model (Supplementary Figure 1). With fewer modes the instabilities disappear, however the model accuracy  
 262 decreases. With more modes, the accuracy asymptotically approaches 100%, however the number of instabilities increases.  
 263

264 Our DMD analysis of RNA-seq data uncovers three distinct modal responses, namely stable, oscillatory, and unstable, and  
 265 the response of each mode is characterized by the corresponding DMD eigenvalue,  $\lambda = a + bi$  (here  $i = \sqrt{-1}$ ). The real part,  
 266  $a$ , and the imaginary part,  $b$ , are what determine the growth (unstable)/decay (stable) rate and the frequency of oscillation,  
 267 respectively. We have plotted the 10 DMD eigenvalues relative to the unit circle in Figure 2b and labeled the eigenvalues according  
 268 to their type. Note that in our model a single eigenvalue is either both stable and oscillatory, unstable and oscillatory, or only stable.  
 269 Also, since our data are real-valued, any complex eigenvalue

270 must be associated with a complex conjugate pair, explaining the symmetry across the real axis in Figure 2b.  
 280

281 The first type of mode that we recover is stable and are characterized by eigenvalues which are inside the unit circle. The  
 282 magnitude of eigenvalues inside the unit circle are strictly less than one and such a set of stable modes indicate relative decay,  
 283 that is to say that many genes have a temporal response which only transiently deviate from a neutral fold change (fold change  
 284 equal to one for non-standardized trajectories and fold change equal to zero for standardized trajectories). Stable modes that  
 285 have eigenvalues nearer to the unit circle are capturing majorly uninhibited genes, while stable modes that are nearer to the origin  
 286 are capturing genes which converge to neutral fold change exponentially, i.e. they exhibit strong relative decay in their fold  
 287 change.  
 288

289 The second type of dynamic mode we uncover is oscillatory and are characterized by eigenvalues with nonzero imaginary  
 290 part. Since gene expression data is always real-valued, oscillatory modes will always come in complex conjugate pairs. Each pair  
 291 of complex-valued modes then describes a fixed frequency of oscillation, and each gene's dynamics can be reconstructed from one  
 292  
 293  
 294  
 295  
 296  
 297  
 298  
 299

300 or more of these frequencies. The work of Sirovich found that  
301 the oscillatory modes obtained from DMD represent the genes  
302 underlying the yeast cell cycle, and the frequencies of oscillation  
303 were shown to provide an estimate of the cell cycle period that  
304 agrees with the literature [66].

305 The third and final type of mode we recover is an unstable  
306 response characterized by eigenvalues whose magnitude is larger  
307 than one. Driven by the impulse input of malathion, many genes  
308 show temporal response that were either upregulated or down-  
309 regulated. If the upregulation and downregulation is persistent  
310 throughout the gene's temporal profile or occurs at later times,  
311 there must be at least a single mode with eigenvalue outside the  
312 unit circle to be able to capture the underlying unstable response.  
313 This is because DMD is essentially learning a linear state-space  
314 representation of the fold change response and a linear system  
315 can only exhibit three types of limiting behaviors, i) convergence  
316 to the origin (stable), ii) periodic orbits, and iii) divergence to  
317 infinity (unstable). Therefore, for the reconstruction accuracy  
318 to be maximized, DMD eigenvalues with magnitude larger than  
319 one may be necessary. Such eigenvalues are marked with rela-  
320 tive growth in Figure 2b. Though the eigenvalues are outside the  
321 unit circle, they are only marginally so, implying that unstable  
322 trajectories make up only a small portion of the transcriptomic  
323 response to malathion.

324 Despite the fact that most genes require a superposition of  
325 all of the dynamic modes for accurate reconstruction, we show  
326 that the modes can successfully group genes into interpretable  
327 clusters. Figure 2c (upper) shows the evolution of three dynamic  
328 modes representative of the transcriptomic dataset: modes 1, 2,  
329 and 6, corresponding to stable (modes 1 and 6) and unstable  
330 (mode 2) directions in gene space. The genes which are most  
331 influenced by each of these modes are obtained from the columns  
332 of the DMD modes  $\mathbf{V}$  and are plotted in the lower part of Figure  
333 2c.

334 The genes which are most influenced by mode 1 are those which  
335 diverge, in a stable manner, from a neutral fold change while the  
336 genes most influenced by mode 2 are those which diverge away  
337 from neutral fold change, capturing unstable trajectories. This  
338 is consistent with the eigenvalues of mode 1 and mode 6, which  
339 are stable and unstable, respectively. Finally, the genes most  
340 influenced by mode 6 are those with no clear trend present in  
341 their dynamics. In the next section, we will characterize those  
342 genes which contribute to cell state reconstruction and act as  
343 reporters for the malathion specific response. Relatedly, of the  
344 20 genes that are most impacted by mode 1, seven of these genes  
345 contribute highly to cell state reconstruction (they are within the  
346 top 20 genes that contribute to the observability of the system).

347 The model of the gene expression response to malathion that  
348 we have learned using DMD has been shown to be interpretable,  
349 clustering genes with distinct temporal responses. To instill con-  
350 fidence in the model, we measure the accuracy of reconstruction  
351 using the coefficient of determination,  $R^2$ , as the metric. The  
352  $R^2$  is computed by feeding an initial condition (the gene expres-  
353 sion at time  $t = 0$ ) to the model and then predicting all subse-  
354 quent time points; for the nine time points in the dataset, this  
355 amounts to two eight-step predictions across the biological repli-  
356 cates. Specifically, the reconstruction is computed precisely as  
357 depicted in Fig 2a where  $\mathbf{V}$ ,  $\mathbf{A}$ , and  $\mathbf{b}$  are held constant and  
358 only the time  $k$  is updated to obtain the DMD estimate of the  
359 bulk cell state at time  $k$ . We emphasize that this is distinct from  
360 measuring model accuracy by computing a one-step prediction  
361 for each time point, which gives very little information about  
362 the dynamic process that has been captured. We obtain an  $R^2$   
363 of 0.92, showcasing that the low-dimensional model learned via

DMD has accurately captured the dynamics of the fold change  
364 response. To provide a foundation for understanding when linear  
365 models can accurately represent fold change dynamics, we have  
366 shown, in the Supplementary Information, that the fold change  
367 response of two linear systems, under stated assumptions, can be  
368 represented as the solution of a linear system. 369

370 The results of this section demonstrate that the set of 10 re-  
371 covered DMD modes, eigenvalues, and amplitudes are indeed bi-  
372 ologically relevant to the dynamics of the malathion response  
373 in the window of time that we have sampled the transcriptome.  
374 The DMD model predictions for five randomly selected genes in  
375 the SBW25 transcriptome are depicted in Figure 2d. These five  
376 genes each exhibit a distinct response, and each are well cap-  
377 tured by our DMD model. Though only five genes are presented,  
378 the result is representative of the whole transcriptome prediction.  
379 A key point then is that gene expression dynamics sampled at  
380 the resolution of minutes can be well approximated by a linear  
381 dynamical system, i.e. by a set of exponentially shrinking and  
382 growing modes. In what follows, we develop a sensor placement  
383 framework, relying on the learned linear dynamical system, to  
384 generate a ranked list of encoder genes, i.e. subsets of genes  
385 which show variation to malathion induction and that can reca-  
386 pitulate the cell state.

387 **Sensor placement for cell state inference and extrac-**  
388 **tion of genetic sensors.** Gene interaction networks are com-  
389 plex systems that induce systematic interdependencies between  
390 genes. That is to say that the expression of most genes, if not  
391 all, depends on the expression of at least one more genes in the  
392 network. These interdependencies make it possible to measure  
393 only a subset of genes to infer the behavior of all other genes [72].  
394 In this section, we will show that time-series measurements of a  
395 subset of genes, called *encoder genes*, are sufficient to capture  
396 the entire cell state, making the system observable. The system  
397 we are referring to is the transcriptome or fold change dynamics  
398 that we now have a DMD representation for and it is observable  
399 when the complete initial cell state,  $\bar{\mathbf{z}}_0$ , can be uniquely inferred  
400 from output measurements  $\mathbf{y}_k$ , for times  $k = 1, 2, \dots, T$ , where  
401 the measurements are linear combinations of the expression of  
402 all genes (see Methods).

403 The approach taken in this work for evaluating whether a gene  
404 is an encoder of complete cell state information is to quantify how  
405 much each gene contributes to observability. To do this, we op-  
406 timize a scalar measure of the observability gramian, a matrix  
407 which determines the amount of information that a set of sen-  
408 sors can encode about a system. In the context of transcriptome  
409 dynamics, given the DMD representation of the dynamics and  
410 a chosen gene sensor placement, the gramian quantitatively de-  
411 scribes i) to what degree cell states are observable and ii) which  
412 cell states cannot be observed at all. Increasing i) while decreas-  
413 ing ii) is the aim of many sensor placement techniques; further-  
414 more, many scalar measures of the gramian have been proposed  
415 to determine the sensor placement which maximizes the observ-  
416 ability of the underlying dynamical system [73–75].

417 To provide a method which is capable of handling high-  
418 dimensional networks, we optimize the *signal energy*,  $\sum_{i=0}^T \mathbf{y}_i^\top \mathbf{y}_i$ ,  
419 of the underlying system as it does not require explicit compu-  
420 tation of the observability gramian. Computing gramians from  
421 unstable and/or high-dimensional systems is computationally ex-  
422 pensive and hence we choose to use the measure which can scale  
423 for a wide array of biological datasets collected from diverse host  
424 organisms. To further emphasize this point, we note that we are  
425 implicitly optimizing over  $5.5 \times 10^{29}$  sensor placement combina-  
426 tions, if we choose to select 15 genes from the full set of 624 (624  
427 choose 15). The strategy we employ is to assign gene sampling

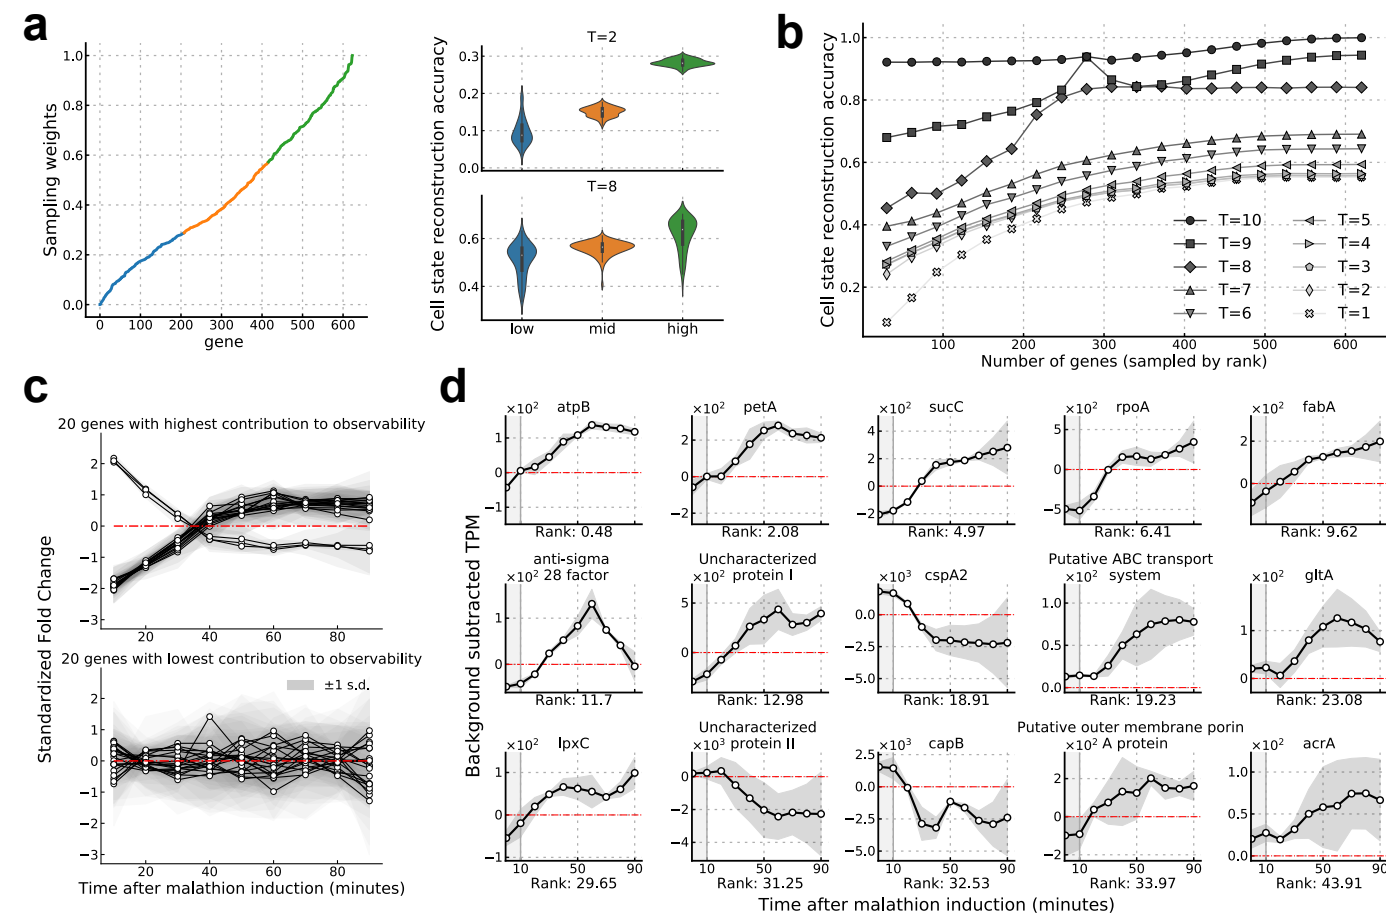

**Figure 3: Gene sampling weights which maximize observability provide a machine learned ranking for extraction of genetic sensing elements.** (a) The gene sampling weights  $w$  are sorted by value and plotted in the left panel. The weights are grouped into three categories: i) the third of genes with highest magnitude of sampling weights (plotted in green), ii) the third of genes with second highest magnitude of sampling weights (plotted in orange), and iii) the lower third that remains (plotted in blue). The right panel depicts the reconstruction accuracy ( $R^2$ ) between the true initial condition and the estimated initial condition when sampling 50 genes at random from each of the aforementioned groups for (top)  $T = 2$  time points and (bottom)  $T = 8$  time points. The reconstruction accuracy was measured for a total of 100 runs each with a distinct set of 50 genes from each group. (b) Reconstruction accuracy between the estimated initial condition  $\hat{z}_0$  and the actual  $\bar{z}_0$  is plotted for number of sampled time points  $T = 1$  to  $T = 10$ . Each data point is obtained by sampling genes by rank (the amount sampled is given on the x-axis), generating outputs for  $T$  time points, and then estimating the initial condition. (c) The fold change response of the 20 genes which contribute most (top) and least (bottom) to the observability of the initial cell state are plotted. The error bars represent the sample standard deviation across two biological replicates. (d) The background subtracted TPM (malathion (TPM) – negative control (TPM)) of the 15 encoder genes selected from the proposed ranking – by contribution to observability. The label on each x-axis indicates the percentage rank (out of 624 genes) of the gene, with respect to the gene sampling weights, and zero here being the highest rank. The error bars indicate the sample standard deviation across two biological replicates. Malathion was introduced to the cultures after collecting the sample at 0 minutes, hence this sample is not used for modeling and cell state inference and this time window is shaded in gray.

428 weights,  $w_g$ , to each gene  $g$  through optimizing sensor placement, 429  
 i.e. maximizing the signal energy. The significance of the magni- 430  
 tude of each weight is to rank each gene by their contribution to 431  
 observability, i.e. higher magnitude denotes higher contribution. 432  
 The Methods section provides quantitative details on the relation- 433  
 ship between observability, the observability gramian, and 434  
 signal energy for sensor placement.

435 By examining the learned gene sampling weights, we found 436  
 that nearly all 624 modeled genes contribute, some insignificantly, 437  
 to the observability of the system. Displayed in Figure3a (left) 438  
 are the magnitude of gene sampling weights,  $w$ , whose elements 439  
 have been scaled to be in the range 0 to 1, that maximize the ob- 440  
 servability of the cell state. We note that the relative magnitude

of the weights are what is important, therefore any linear scaling 441  
 will preserve the information that are contained in the weights. 442  
 Weights that are negative-valued (not shown here) correspond to 443  
 downregulated genes and weights that are positive-valued corre- 444  
 spond to genes that are upregulated. The higher the magnitude 445  
 of the gene sampling weight, the more important the gene is 446  
 likely to be for cell state reconstruction. To test this notion, the 447  
 sampling weights are artificially grouped into three categories, 448  
 distinguishing genes which correspond to the top (green), 449  
 middle (orange), and lower (blue) third for magnitude of sam- 450  
 pling weights. Each category contains 208 genes, and next we show 451  
 the gain in information that can be achieved when sampling from one 452  
 category over another. 453

454 To examine the contribution to observability provided by genes  
455 in each of the categories, we perform Monte Carlo simulations to  
456 estimate the expected predictability of the initial cell state. From  
457 output measurements,  $y_i$  ( $i = 1, 2, \dots, T$ ), that are generated by  
458 randomly sampling 50 genes from a specified category (low, mid,  
459 high), the cell state,  $\bar{z}_0$ , is estimated and the coefficient of deter-  
460 mination ( $R^2$ ) between the actual and estimated cell state is  
461 computed as a measure of reconstruction accuracy. The simula-  
462 tion is repeated 1000 times for each category and the resulting  
463 distributions over the random gene sets are plotted in Figure 3a  
464 (right). In the top panel, we can see that when  $T = 2$  (2 time  
465 points are used for reconstruction), predictability of the cell state  
466 is low in all cases, and it is highest for the genes in the high cat-  
467 egory. Specifically, the reconstruction accuracy is three and two  
468 times larger in the high category than in the low and mid cate-  
469 gories, respectively. Similarly, when the number of time points,  
470  $T$ , is increased to eight, exhausting the time points we are model-  
471 ing before extrapolation, the genes in the high category best  
472 reconstruct the cell state. We found that the low and mid cate-  
473 gory genes are also capable of significant reconstruction of the  
474 cell state, exemplifying that there is a rich amount of information  
475 encoded in the dynamics. This further highlights the importance  
476 of carefully designing experiments that are sufficiently rich in  
477 conditions and time points.

478 Measuring fewer genes for many time points leads to higher  
479 cell state reconstruction accuracy than if many genes are mea-  
480 sured for fewer time points. This result is demonstrated in Fig-  
481 ure 3b which shows how the cell state reconstruction accuracy  
482 is affected by two parameters, the number of sampled genes and  
483 the number of time points,  $T$ , that the genes are measured for.  
484 The reconstruction accuracy is again the coefficient of determi-  
485 nation,  $R^2$ , between the reconstructed initial condition,  $\hat{z}_0$ , and  
486 the actual initial condition  $\bar{z}_0$ . For each  $T$ , the first data point  
487 is generated by sampling only the five genes with the highest  
488 sampling weights for  $T$  time points. The complete cell-state is  
489 then inferred from these measurements alone and the coefficient  
490 of determination between the estimated and actual cell state can  
491 be computed (see Methods for a detailed description of the cell  
492 state inference algorithm). To compute subsequent data points,  
493 the next five genes with maximum sampling weights are simulta-  
494 neously measured along with previously measured genes, and  
495 the cell state is reconstructed again. For the response of SBW25  
496 to malathion, we find that even if only the top five genes are  
497 measured but for  $T = 10$  time points, the cell state reconstruc-  
498 tion is still more accurate than if all genes with nonzero sampling  
499 weights are measured with  $T \leq 8$  time points. This signifies that  
500 the ability to study the dynamics of a few genes with fine tem-  
501 poral resolution can greatly increase the knowledge of the entire  
502 system.

503 Failure to reconstruct the initial cell state is a result of two  
504 mechanisms. The first is that we only have access to the DMD  
505 representation of the dynamics, not the true dynamics. There-  
506 fore, any output measurements generated using the DMD model  
507 will certainly incur an error with respect to the actual dynam-  
508 ics. As error accumulates each time-step, it is possible for the  
509 reconstruction accuracy to decrease with increasing time points.  
510 In addition to this, if a gene is added to the set of sensors, yet  
511 its dynamics are poorly predicted by the model, then it can drag  
512 down the cell state reconstruction accuracy. This can be ob-  
513 served in two curves in Figure 3b, namely for  $T = 10$  and  $T = 9$ .  
514 The second hindrance for full cell state reconstruction is when  
515 many genes contain redundant information. If two genes have  
516 nearly identical gene expression profiles, adding the second gene  
517 to the set of measurements provides no useful information for the

cell state inference. This may explain the asymptotic behavior  
of the curves in Figure 3b. There are only relatively few distinct  
dynamic profiles present in the transcriptomic dataset, and once  
all distinct profiles have been sampled, no further improvement  
in reconstruction can occur. This explanation is consistent with  
the fact that many genes co-express [44] and this fact has even  
been used to reconstruct dynamic gene regulatory networks [76].

The gene sampling weights,  $\mathbf{w}$ , provide a machine learned  
ranking for discovering genetic sensors. Recall that the fold  
change was taken to be the state of the system when perform-  
ing DMD. In so doing, we show that the encoder gene ranking  
can also predict genes that respond to malathion in a condition  
specific manner. Specifically, genes which contribute highly to  
the observability of the system are genes which show prolonged  
dysregulation in the presence of malathion. This is visualized in  
Figure 3c where in the top panel the 20 genes which have the  
largest sampling weights are plotted. Each of the 20 genes show  
dysregulation from the neutral fold change (0) that is persistent  
over the course of the time-series. Conversely, the 20 genes with  
lowest sampling weights show no clear trend or signal of dysreg-  
ulation.

To show that encoder genes can act as genetic reporters for  
malathion, we selected a set of 15 genes with which to construct  
transcriptional reporters from. The 15 time-series profiles gener-  
ated via RNA-seq (malathion TPM - control TPM) are visualized  
in Figure 3d. To select this set of 15, the genes were first ranked  
(out of 624 genes) based on their gene sampling weights with 0  
being the highest. Then a randomly chosen subset of 15 genes  
from the top half of the ranking were used to reconstruct the cell  
state. The subset of 15 which produced the highest cell state  
reconstruction accuracy, i.e. which maximize the observability  
of the cell state, were chosen as the encoder genes with which  
to design genetic reporters from. Specifically, the observability  
maximizing set of 15 genes shown in Figure 3d achieve a cell state  
reconstruction accuracy of 76% when outputs are generated using  
 $T = 8$  time points. Of the 15 selected encoder genes, 12 appear  
to be activated by induction of malathion while the remaining 3  
appear to be repressed.

The selected encoder genes are involved in disparate biological  
processes. Table 1 lists the molecular functions of each of the  
selected genes based on their Gene Ontology (GO) annotations  
[77]. Where gene names are not available, we have used protein  
annotations to denote those genes. It is shown that the set of  
molecular functions are diverse, indicating that malathion drives  
the activation and repression the disparate biological processes.  
This is precisely the goal of our sensor placement framework,  
to select genes which not only show variation to the biological  
process of interest and recapitulate the cell state, but also to  
select genes which are involved in distinct dynamical processes.  
When synthesized into genetic reporters, as we will show next,  
these encoder genes exhibit distinct dynamic range, sensitivity,  
and time-scales in response to malathion.

### Design and characterization of fluorescent malathion sensors.

To validate the transcriptome-wide analysis for identification  
of biosensors, the putative promoters of the candidate sensor  
genes were cloned into a reporter plasmid containing a reporter  
gene encoding *sfGFP* (superfolder green fluorescent protein) and  
transformed into the host SBW25 (Figure 4a). The reporter  
strains are cloned in an unpooled format, allowing for malathion  
response curves to be generated at the reporter level as opposed  
to a pooled study which would incur additional sequencing costs  
for individual strain isolation.

Malathion reporters are characterized in the laboratory in an

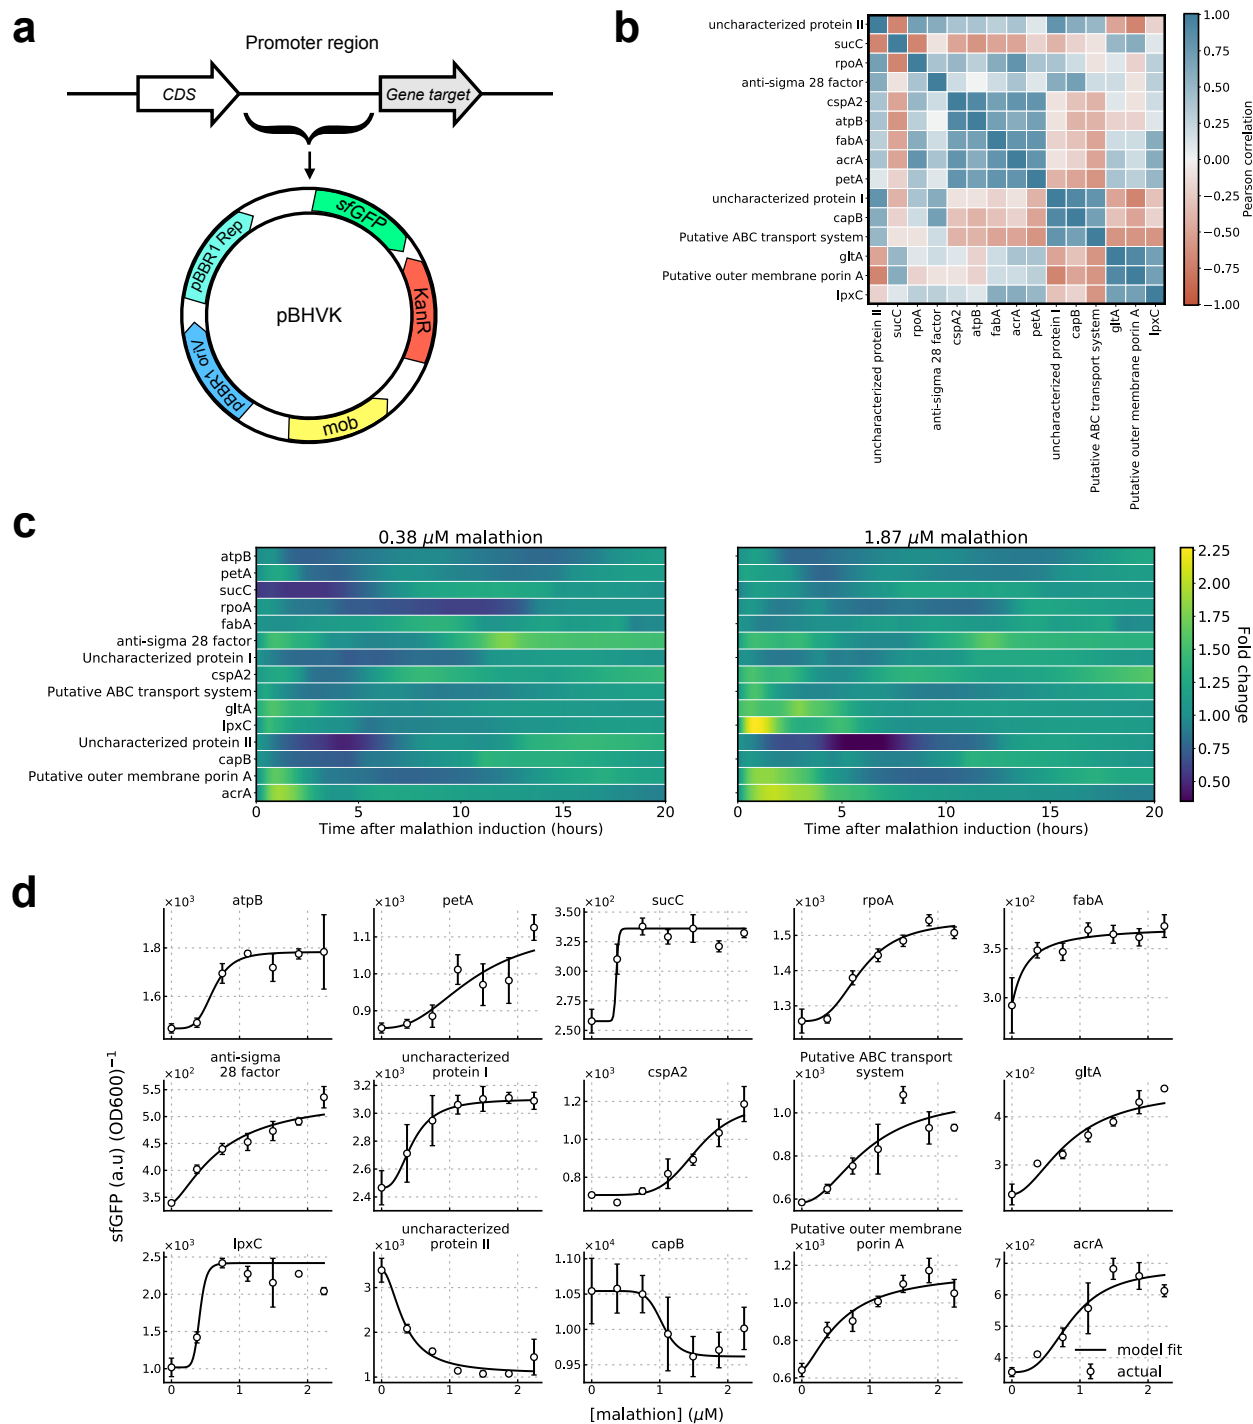

**Figure 4: Our machine learning approach successfully extracted 15 sensors, each with distinct malathion response curves.** (a) A map of the plasmid, pBHVK, used to construct the library. The plasmid contains a kanamycin resistance gene as well as a fast-folding *sfGFP* gene. (b) Hierarchical clustering performed on correlations between each pair of reporter strain response at 1.87  $\mu\text{M}$  malathion. (c) Average per cell *sfGFP* signal at 0.37  $\mu\text{M}$  (left) and 1.83  $\mu\text{M}$  (right) malathion normalized by signal at 0.0  $\mu\text{M}$  malathion is shown for all 15 engineered strains. (d) Transfer curves (or response curves) for each strain is depicted with markers and their fit to Hill equation kinetics are given by solid lines. The Hill equation parameters are given in Table 1. The promoter sequences corresponding to each reporter and time points for each transfer curve are given in Supplementary Tables 2 and 4, respectively. The error bars represent the standard deviation from the mean across three biological replicates.

582 environmentally relevant way by sourcing malathion from the  
 583 commonly used commercial insecticide called Spectracide (con-  
 584 taining 50% malathion). First, it was verified that the response  
 585 of the reporters to analytical standard malathion was consistent  
 586 with the response when induced with Spectracide. That is to

say that if the reporter was upregulated (downregulated) in  
 response to malathion, it was also upregulated (downregulated) in  
 response to Spectracide. Furthermore, the culture media con-  
 taining nutrients and Spectracide that the reporter strains were  
 cultured in was analyzed with mass spectrometry and compared

587  
 588  
 589  
 590  
 591



592 to the mass spectrum of analytical standard malathion. Compar- 593  
594 ing the two mass spectra, we found that they are nearly identical  
595 (Supplementary Figs. 7-19). See the Methods section for more  
596 details about the use of Spectracide as a source for malathion  
597 and Supplementary Figure 4 for the effect of Spectracide on the  
growth of the reporter strains.

598 To examine the transcriptional activity of *sfGFP*, controlled by  
599 the encoder gene promoters, cells are grown in rich medium  
600 and fluorescence output was measured every three minutes over  
601 24 hours of growth. This resulted in 400 time points per reporter  
602 strain, a nearly 45 fold increase over the number of time points  
603 obtained via RNA-seq. Prior to starting the experiment and col-  
604 lecting fluorescence measurements, reporter strains were induced  
605 with Spectracide to drive the reporter response. Since *sfGFP* is a  
606 stable protein with a long half-life and fast maturation time [78],  
607 the result is that each strain serves as a reporter for the rate  
608 of transcription initiation. This is distinctly different from the  
609 transcript abundance that is measured via RNA-seq due to the  
610 instability of mRNA molecules.

611 Inducing the reporter strains with malathion results in corre-  
612 lated transcriptional activity. To correlate the reporter strains'  
613 activity, first the *sfGFP* fluorescence is normalized by the OD to  
614 give average per cell fluorescence. The Pearson correlation be-  
615 tween the average per cell fluorescence of all pairs of reporters  
616 is given in Figure 4b. From the heatmap, three distinct posi-  
617 tively correlated clusters are apparent. The strains *cspA2*, *atpB*,  
618 *fabA*, *acrA*, and *petA* form the first cluster. The second positively  
619 correlated cluster contains *uncharacterized protein II*, *capB*, and  
620 *putative ABC transport system*. Lastly, *gltA*, *putative outer mem-*  
621 *brane porin A*, and *lpxC* form the third cluster. Moreover, we  
622 see that the first cluster negatively correlates with the second and  
623 that the second cluster negatively correlates with the third. The  
624 present correlations thus suggest that the genes within a cluster  
625 may have functional dependency in the presence of malathion  
626 or they share a transcriptional regulator. This also highlights  
627 the role of redundancy in gene expression and has been studied  
628 widely in the form of gene co-expression networks or regulons [44].

629 Examining the transcription initiation driven by malathion at  
630 distinct concentrations reveals detailed gene expression dynam-  
631 ics, dependencies of expression on malathion concentration, as  
632 well as the correlations. Firstly, the fold change (with respect  
633 to 0.0  $\mu\text{M}$  malathion and referred to as the background) re-  
634 veals oscillatory signals in several strains; the reporters *atpB*,  
635 *petA*, *cspA2*, and *acrA* each contain oscillations that are near in  
636 phase at 0.38  $\mu\text{M}$  malathion (Figure 4c). As the concentration of  
637 malathion is increased, only *atpB* and *petA* appear to remain in  
638 phase while the signals of the other strains strongly increase. We  
639 also see that *anti-sigma 28 factor* and *rpoA* oscillate with lower  
640 frequency and that *anti-sigma 28 factor* hits a peak around 10  
641 hours after induction while *rpoA* hits an anti-peak around 10  
642 hours after induction. For the lower malathion concentration,  
643 *sucC* has a large lag time until transcriptional activation occurs,  
644 however there is a sharp decrease in the lag time at the higher  
645 concentration. The strains *acrA*, *gltA*, *putative outer membrane*  
646 *porin A*, *putative ABC transport system*, and *lpxC* consistently  
647 respond within minutes of malathion induction with *lpxC* being  
648 the reporter with highest signal over background and *acrA* the  
649 reporter with highest overall signal energy (area under the curve)  
650 in early times. Though *cspA2* was shown by the RNA-seq data  
651 to be repressed by malathion, we find that *cspA2* strain is consis-  
652 tently activated in the presence of malathion. Of the remaining  
653 repressed promoters, *uncharacterized protein II* is far more re-  
654 pressed in the presence of malathion across all concentrations  
655 tested.

The response curves of the reporter strains to malathion 596  
597 strongly resemble Michaelis-Menten enzyme-substrate kinetics. 598  
599 Such kinetics are characterized by exactly two parameters and 600  
601 mathematically described by Hill functions [63] (Methods). The 602  
603 first parameter is the Hill coefficient or cooperativity,  $n$ , which is 604  
605 a measure of how steep the response curve is. This is also denoted 606  
607 as a measure of ultrasensitivity. The second parameter,  $K_M$ , is 608  
609 the Michaelis constant and it is equal to the malathion concen- 610  
611 tration at which the response is half of its minimum value sub- 612  
613 tracted from its maximum value. Figure 4d shows the malathion 614  
615 response curves of each reporter strain at the time point with 616  
617 maximum fold change with respect to the 0  $\mu\text{M}$  malathion con- 618  
619 dition. The solid line depicts the fit of a Hill function to the 620  
621 experimentally generated response curves and the parameters of 622  
623 each Hill function are given in Table 1. The response shown is the 624  
625 average fluorescence per cell obtained by normalizing the *sfGFP* 626  
627 signal by the optical density. See Supplementary Table 4 for the 628  
629 precise time points used here for each strain and see Methods for 630  
631 further details on parameter fitting. 632

633 We find that there is significant variation across the Hill co- 634  
635 efficient, dynamic range, and Michaelis constant in the library 636  
637 of reporters. The Hill coefficient ranges from 1.1 to 21.6, and 638  
639 recalling that this parameter is a measure of sensitivity, the ex- 640  
641 tremes depicted by a small slope in strain *fabA* and large slope in 642  
643 strain *sucC*, respectively. The dynamic range, measured as the 644  
645 difference between the maximum signal and the minimum signal, 646  
647 ranges from 80 to 1401 and is obtained by *sucC* and the repressed 648  
649 *uncharacterized protein II*, respectively. The Michaelis constant 650  
651 ranges from 0.2 to 1.5, depicted by the shift in malathion con- 652  
653 centration at which half of the maximum signal is achieved from 654  
655 *fabA* and *cspA2*.

656 Overall, we find that each synthetic reporter, selected via our 657  
658 data-driven sensor placement framework, is capable of detecting 659  
660 malathion with distinct dynamic ranges and sensitivity. More- 661  
662 over, we note that two of the selected reporters, *ABC transporter* 663  
664 and *acrA*, are membrane transporters and are not expected to be 665  
666 specific to malathion. The above two points motivate combining 667  
668 features from individual reporters to generate a single (virtual) 669  
670 reporter that enhances sensing capabilities. In what follows we 671  
672 demonstrate one approach to achieve such a task. 673

### 674 Superimposing the response of multiple sensors cre- 675 676 ates an enhanced virtual sensor. 677

678 The genetic reporters characterized in the previous section re- 679  
680 spond to malathion with distinct timescales, amplitudes, and 681  
682 frequencies, each acting as a unique report of the environmen- 683  
684 tal context. However, as explained previously, not every reporter 685  
686 is expected to uniquely respond to malathion. Therefore, when 687  
688 testing for malathion in an environmental scenario, the conclu- 689  
690 sion given by individual reporters are expected to have a higher 691  
692 false positive rate than if the measurements were aggregated to 693  
694 form a single, combined sensor. 695

696 Recognizing the need to construct a multi-component sensor 697  
698 from the reporters in our synthetic promoter library, in this sub- 699  
700 section we explore an approach for incorporating each unique 701  
702 temporal response to produce a desired output that provides 703  
704 more information than a single reporter alone. This application 705  
706 of the library views the synthetic reporters as genetic basis func- 707  
708 tions with fixed expressivity, comprising a single-input-single- 709  
710 output genetic network. Here the single input is malathion and 711  
712 the single output is a virtual sensor. As opposed to a biological 713  
714 sensor, a virtual sensor solely processes data originally gathered 715  
716 by the distinct biological sensors [79]. In our case, the 15 genetic 717  
718 reporters described in the previous section comprise the biolog- 719  
720 ical sensors and we aggregate the response measurements from 721

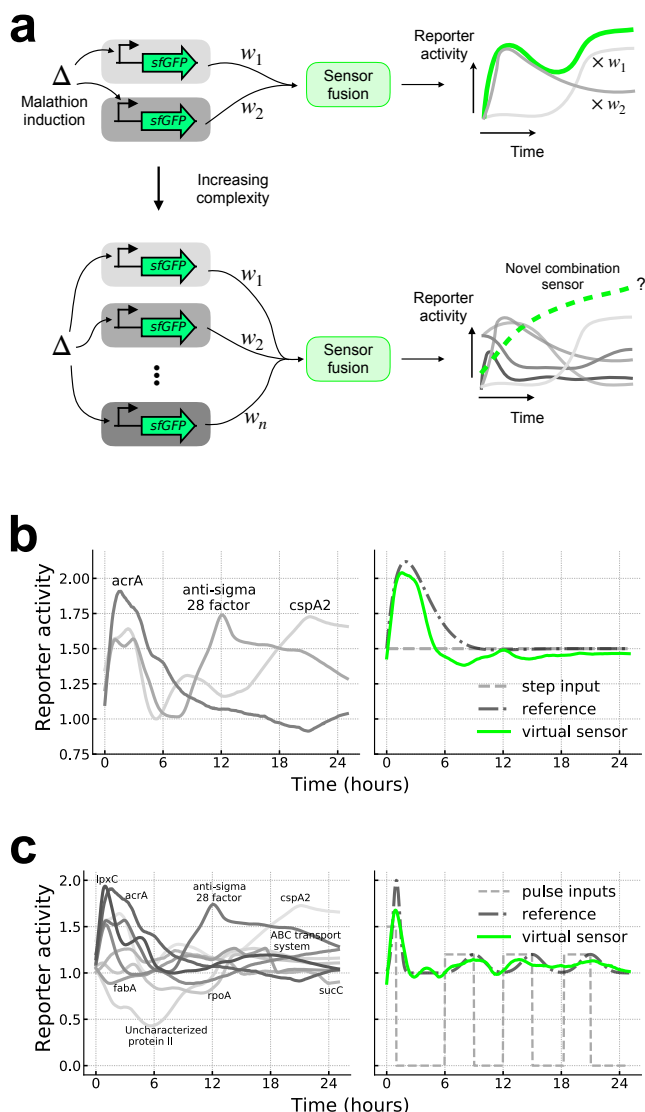

**Figure 5: The superposition of transcriptional genetic sensors creates a virtual, single-input, single-output genetic network.** (a) The schematic depicts the concept of virtual sensing, which combines the output of synthetic genetic sensors to produce a purely software-based output for enhanced malathion reporting. (b) The response of three reporters (left) are superimposed with weights  $\{\beta_{acrA} = 0.6, \beta_{anti-sigma\ 28\ factor} = 0.31, \beta_{cspA2} = 0.26\}$  to output a virtual sensor which recapitulates the second-order response reference trajectory. The dotted blue line represents a step input of malathion, the solid orange curve depicts the desired reference response, and the dashed green curve is the weighted sum of the response to a step input of the three synthetic genetic sensors depicted on the left. (c) Nine reporters are superimposed with weights  $\{\beta_{lpxC} = 0.5, \beta_{acrA} = 0.36, \beta_{fabA} = 0.11, \beta_{uncharacterized\ protein\ II} = 0.58, \beta_{rpoA} = 0.1, \beta_{anti-sigma\ 28\ factor} = 0.13, \beta_{ABC\ transport\ system} = 1.29, \beta_{cspA2} = 0.74, \beta_{sucC} = 0.32\}$  to recapitulate the sequence of radial basis function responses. See the caption of (b) for a description of the legend.

each to produce a purely virtual sensor that has a desired output (Figure 5a). Even though two of the malathion reporters, the membrane transporters, are expected to respond to an array of small molecules, virtual sensing can aggregate information

from all sensors, increasing the confidence in the conclusion of the event that the sensors have been exposed to.

The usefulness of a virtual sensor in the setting of detection of a novel small compound is two-fold, i) aggregating contrasting responses can only reduce the false-positive rate of a detection event and ii) combining individual sensors in a software-based manner reduces the need for implementation of complex synthetic genetic networks and reduces metabolic burden on the host organism. Taking advantage of the benefits of virtual sensing, we develop an approach for enhancing malathion reporting by aggregating the response of the reporters in our library. Specifically, the weighted superposition of malathion responses are used to produce a desired output signal.

We show that transcriptional virtual sensing is capable of detecting environmentally relevant events. Consider a scenario where malathion is discarded in a prohibited site such as a body of water or soil. Such an event might trigger a reference (desired) response that resembles the response of a linear, second-order system to a step input [47]. Specifically, the reference response is characterized by a rapid response to malathion followed by lower magnitude, sustained response (Figure 5b). Treating the reporter library as genetic basis functions, we learn the sparse set of coefficients that approximate the reference trajectory (see Methods for details). We find that with only three sensors, the desired response is accurately captured. The strains *acrA*, *anti-sigma 28 factor*, and *cspA2* each possess peaks shortly after malathion induction, capturing the peak in the reference. At later times, the superposition of the three strains are able to recapitulate the sustained response.

We now consider a second scenario where we aim to detect malathion from a more subtle source where in pulses of malathion are introduced to the system periodically. Figure 5c depicts the pulse inputs and reference trajectory which is comprised of a linear combination of radial basis functions. We find that for this more complex scenario, superposition of the response of nine reporters is required to approximate the reference trajectory.

In both scenarios, a single genetic reporter would not be sufficient to inform of the type of event that occurred. Furthermore, we have shown how virtual sensing can prove useful for aggregation of measurements from individual sensors without having to clone synthetic multi-component reporters, a difficult task due to the tremendously large size of the design space and the emergent effects seen when composing genetic parts.

#### Detecting malathion in environmental samples.

In the previous section, we discussed how we can virtually enhance the sensing ability of the malathion reporter library in environmentally relevant scenarios. However, the library has only been examined in an ideal laboratory scenario with either pure or processed malathion that has been analyzed with mass spectrometry; it is not yet known if the reporters will be able to sense malathion when induced with actual environmental water samples that have been treated with the insecticide. Confounding factors may be present in the environmental sample such as other small compounds that may make it difficult to deconvolve malathion response from the response due to the confounder. Therefore, in this section we describe an experiment to assess whether or not the malathion concentration can be deduced from our reporters treated with environmental insecticide samples.

In order to test if the genetic reporters can sense malathion from environmental samples, irrigation water was collected from three crops after being sprayed with a mixture of Spectracide (50% malathion) and water (Figure 6a). The concentration of the mixture sprayed was either 0, 1, or 8 times the maximum recommended working concentration of Spectracide – 1 fluid ounce

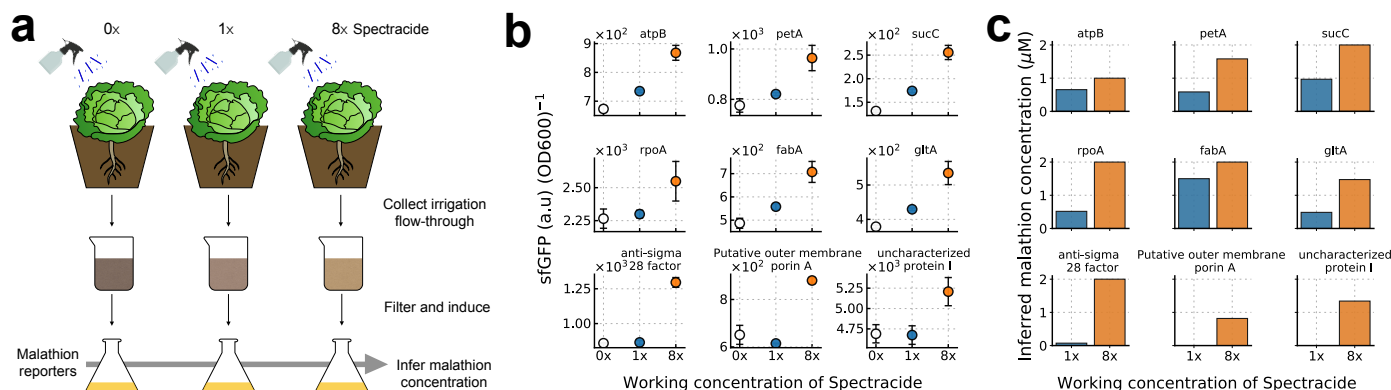

**Figure 6: Irrigation water containing malathion from an agricultural setting activates transcriptional reporters and allows for inference of environmental malathion concentration.** (a) Three cabbage plants are sprayed with a solution of 0, 1, and 8 times the working concentration of Spectracide, respectively. The flow-through is first captured and filtered and then used to induce transcriptional activity in the malathion reporter strains. Using previously characterized response curves for each reporter, an inference for the malathion concentration can be made. (b) The average per cell fluorescence (arbitrary units) of 9 out of the 15 malathion reporters, after 24 hours of induction, showed activation due to the soil runoff solution containing malathion. The working concentration of Spectracide is instructed as 1oz of Spectracide to 1 gallon of water. The error bars represent the sample standard deviation from the mean across three biological replicates. (c) The concentration of malathion present in the irrigation water is inferred using the signal from (b) and the fitted response curves from Figure 4d.

788 per gallon of water. To rid the solution of unwanted microbes  
 789 and particles, the irrigation water was strained and filtered prior  
 790 to the induction of the genetic reporters (see Methods). The  
 791 growth and induction protocols all remain the same as for the  
 792 samples treated with Spectracide in Figure 4c,d.

793 We found that a total 9 out of the 15 of the reporters were  
 794 activated by induction of the irrigation water containing malathion.  
 795 Fig 6a shows the average per cell fluorescence 24 hours after  
 796 induction of the nine strains subjected to 0, 1, or 8 times the  
 797 working concentration of Spectracide. The reporters *atpB*, *petA*,  
 798 *sucC*, *rpoA*, *fabA*, and *gltA* all show a response to malathion at 1x  
 799 working concentration, while the remaining three did not show  
 800 significant differences from the negative control in this range.  
 801 Among the strains in Figure 6b, the strain *sucC* was activated  
 802 the most, showing an 80% increase from the 0x to 8x condition  
 803 after the 24 hour time period. This shows that many of the selected  
 804 genetic reporters, 60%, are able to detect malathion in  
 805 environmentally relevant scenarios, and, furthermore, we can use  
 806 this data to infer the concentration of malathion present in the  
 807 samples collected from the environment.

808 The response curves characterized previously in Figure 4d for  
 809 each of the genetic reporters can be used to make an inference  
 810 about the amount of malathion present in each environmental  
 811 sample. Note that we are making the assumption that the response  
 812 curves characterized for each of the nine reporters can be  
 813 applied to this new setting of treatment with irrigation water.  
 814 With this assumption we can then use the fitted Hill equations  
 815 from Figure 4d and numerically estimate the malathion concentration  
 816 that reproduces the signal at 1 or 8 times the working  
 817 concentration of Spectracide. The results obtained are shown in  
 818 Figure 6b for each of the nine strains. Through this approach, the  
 819 reporters provide a range of inferred malathion concentrations;  
 820 at the working concentration of Spectracide, we can infer that  
 821 the concentration of malathion is in the range 0.48 – 0.97  $\mu\text{M}$   
 822 and at 8 times the working concentration of Spectracide, we can  
 823 infer the concentration of malathion to be in the range 0.82 – 2  
 824  $\mu\text{M}$ . It is important to note that for most, if not all, of the  
 825 characterized reporter strains, 2  $\mu\text{M}$  was the maximum discernable  
 826 concentration before the signal saturates. Therefore, it is possi-

ble the concentration of malathion is higher than 2  $\mu\text{M}$ , however  
 that range cannot be detected by our reporter library.

## Discussion

829 It is often the case that biologists seek to identify key genes which  
 830 show variation for the biological process of interest. Many tools  
 831 have been developed or adapted to meet this need e.g. differential  
 832 expression and principal component analysis to name only a  
 833 few. However, when using the current tools, there is potential to  
 834 measure system variables that are redundant which can lead to  
 835 wasted time and resources. Therefore, we developed an efficient  
 836 method that identifies the variables that allow for the inference of  
 837 the complete system. The method combines dynamic mode  
 838 decomposition (DMD) and observability of dynamical systems to  
 839 provide a systematic approach for the discovery of perturbation-  
 840 inducible genes. To extract optimal biosensors from our model,  
 841 we showed that if the fold change was taken as the state of the  
 842 system, the encoder genes inform the design of transcriptional  
 843 reporters that showcase condition specific sensing.

845 We introduced DMD as a novel tool for analysis of transcriptome  
 846 dynamics. In this case, we studied bulk transcriptome  
 847 dynamics at the minutes resolution and showed that the low-  
 848 dimensional DMD representation accurately predicts the dynamics  
 849 and clusters genes based on temporal behavior. Our results  
 850 suggest that DMD is a capable tool for analysis of transcriptomic  
 851 data and warrants further exploration in single-cell RNA-seq and  
 852 other omics technologies that aim to infer cell trajectories, pseudo-  
 853 time, and single-cell regulatory networks.

854 The identification of transcriptional genetic sensors was posed  
 855 as a design challenge, where a subset of genes are selected to  
 856 maximize the observability of the cell state. It was shown that a  
 857 large fraction of genes contribute insignificantly to the cell state  
 858 observability when only few time points are measured, further  
 859 validating the common knowledge that genetic networks possess  
 860 redundancies and are noisy. We also showed that it is significantly  
 861 more beneficial to measure a sparse set of genes for more  
 862 time points than to measure more genes for fewer time points.

863 Our results suggest future joint experimental and computational  
864 approaches which limit the amount of resources required to get  
865 a full description of the system dynamics. A natural extension  
866 of our work is to determine how well measurements from a small  
867 library of reporters recapitulate the bulk cell state under unseen  
868 conditions. Such studies will inform how RNA-seq data should  
869 be collected in the future in order to maximize the reconstruction  
870 accuracy and minimize labor and experimental costs.

871 The machine learning driven selection of genetic reporters was  
872 shown to produce 15 functional biosensors with a variety of  
873 malathion response curves. We demonstrated how to aggregate  
874 information from each reporter to create a virtual sensor that  
875 can be used to infer events of interest. Moreover, we showed  
876 that the genetic reporters can be used to detect malathion in  
877 environmental settings. More generally, our results and method-  
878 ology offer an innovative approach that can be used to identify  
879 perturbation-inducible gene expression systems. We emphasize  
880 that our approach takes advantage of the largely untapped re-  
881 sources present in native host genomes and we anticipate that  
882 techniques like the one developed here will produce a plethora of  
883 parts for synthetic biologists to build useful devices from.

884 Lastly, our developed approach makes no assumptions on the  
885 nature of the underlying system. In that sense, the framework  
886 we have developed is general and can be applied to data gener-  
887 ated from other 'omics techniques and from any organism. In the  
888 case that a linear response model is insufficient for capturing the  
889 transcriptome dynamics, it can be extended to a variety of non-  
890 linear models to capture nonlinear modes of response [71]. An  
891 interesting extension of observability to transcriptome dynamics  
892 would be to construct state-estimators (also known as observers)  
893 of the dynamics for real-time monitoring of gene interaction net-  
894 works [80]. Such approaches could find potential use in designing  
895 and implementing better diagnostic tools for synthetic biologists.  
896 Finally, further refinement of the list of encoder genes could be  
897 obtained by fusing ChIP-seq (chromatin immunoprecipitation fol-  
898 lowed by sequencing) with RNA-seq measurements to discover  
899 transcription factors, however such an experimental assay can  
900 be prohibitively expensive. The DNA binding sites measured  
901 by ChIP-seq alone are not sufficient to infer regulation of tran-  
902 scription. However, together with RNA-seq, the set of encoder  
903 genes which causally drive the condition specific response can be  
904 uncovered.

## Methods

905 **Rapid culture sampling.** For each biological replicate, *Pseu-*  
906 *domonas fluorescens SBW25* glycerol stock was scraped and inocu-  
907 lated in 5 mL of fresh LB broth (Teknova Catalog no. L8022) and  
908 was incubated and shaken at 30°C and 200 r.p.m. for 15 hours. The  
909 OD<sub>600</sub> of the 5 mL culture was measured and the entire culture was  
910 transferred to 50 mL of fresh LB broth, which was then proceeded by  
911 incubation and shaking. Once the OD<sub>600</sub> of the 50 mL culture reached  
912 0.5, the culture was again passaged into 300 mL of fresh LB broth. The  
913 300 mL culture was grown until OD<sub>600</sub> of 0.5. Then the culture was  
914 split into two 150 mL cultures (one for malathion induction and one for  
915 the negative control). The two cultures were sampled at evenly spaced  
916 intervals in time (see Supplementary Table 1 for sampling volumes  
917 and times) and after the 0 minute sample, malathion (Millipore Sigma  
918 Catalog no. 36143) was introduced to the positive condition at 1.83  
919 mM. To separate the media from the cells, a vacuum manifold with  
920 3D printed filter holders was constructed and utilized (Supplementary  
921 Figure 6). 0.45 μm PVDF membrane filters (Durapore Catalog no.  
922 HVL04700) were placed on the filter holders, a vacuum pump was  
923 turned on, and the culture sample was dispensed onto the center of  
924 the filter, quickly separating the media from the cells. The filter with  
925 the cells was then placed into a 50 mL conical centrifuge tube (Fisher

Scientific 1495949A) using sterile tweezers. The tube with the filter  
926 was then submerged into a liquid nitrogen bath for 10 seconds to flash  
927 freeze the sample. The sample were then stored -80 °C.  
928

929 **RNA extraction.** To extract the RNA, first the filter-harvested cells  
930 were resuspended in 2 mL RNAProtect Bacterial Reagent (Qiagen Cat-  
931 alog no. 76506), then pelleted in a centrifuge. To lyse the cells, the pel-  
932 let was then resuspended in 200 μL of TE Buffer containing 1 mg/mL  
933 lysozyme. The RNA was then extracted from the lysed cells using  
934 Qiagen RNeasy Mini Kit (Catalog no. 74104), and the samples were  
935 DNase treated and concentrated using Zymo RNA Clean and Concen-  
936 trator (Catalog no. R1019).

937 **RNA library preparation and sequencing.** Bacterial rRNA was  
938 depleted using NEBNext Bacterial rRNA Depletion Kit (Catalog no.  
939 E7850X). The indexed cDNA library was generated using NEBNext  
940 Ultra II Directional RNA Library Prep (Catalog no. E7765L) and  
941 NEBNext Multiplex Oligos for Illumina (Catalog no. E6609S). In to-  
942 tal, 40 samples (two biological replicates, 10 time points, two condi-  
943 tions) were prepped and sequenced. The library was sequenced at the  
944 Genetics Core in the Biological Nanostructures Laboratory at the Uni-  
945 versity of California, Santa Barbara on an Illumina NextSeq with High  
946 Output, 150 Cycle, paired end settings.

947 **Pre-processing of sequencing data.** The raw reads were trimmed  
948 for adapters and quality using Trimmomatic [81]. The reads were then  
949 pseudoaligned with Kallisto [82] to the *Pseudomonas fluorescens*  
950 *SBW25* transcriptome generated using GFFRead [83] and GenBank  
951 genome AM181176.4. The normalized gene expression of transcripts  
952 per million (TPM), which takes into account sequencing depth and  
953 gene length, are used for modeling and analysis. Genes with an aver-  
954 age TPM less than 100 in all experimental conditions were discarded  
955 from our analysis.

956 **Malathion reporter library cloning.** For the reporter plasmid  
957 cassette design, first, the closest intergenic region to the gene target  
958 larger than 100 base pairs (bp) was identified based on the open reading  
959 frame of the sequenced genome of *Pseudomonas fluorescens* SBW25  
960 (GenBank genome AM181176.4). Primers were designed to include the  
961 entire intergenic region in order to capture any transcription-regulator  
962 binding sites surrounding the promoter (Figure 4a). The identified  
963 intergenic regions were amplified using the primers and this is what  
964 we refer to as 'promoter regions' following the terminology of [84].  
965 The promoter regions were cloned into a cassette on the plasmid back-  
966 bone pBHVK (Supplementary Figure 3) containing a bicistronic ribo-  
967 some binding site and super folder GFP (*sfGFP*) as the reporter gene.  
968 Lastly, a cloning site was placed in the cassette so that the cloned  
969 promoter controls transcriptional activity of *sfGFP*.

970 The promoters were assembled onto the plasmid backbone pBHVK  
971 (see Supplementary Fig. 3) via Golden Gate Assembly [85] using  
972 NEB Golden Gate Assembly Kit (Catalog no. E1601S). Because of  
973 the potential of arcing during electrotransformation of *Pseudomonas*  
974 *fluorescens* SBW25 with Golden Gate reaction buffers, the plasmids  
975 are first subcloned into *E. coli* Mach1 (Thermo Fisher Scientific Cat-  
976 alog no. C862003) following the manufacturer's protocol for chemi-  
977 cal transformation. Between three and six colonies are selected for  
978 each strain and the reporter cassette was sent for sequencing at Eu-  
979 rofins Genomics. Then the plasmid DNA was prepared from cultures  
980 of transformed Mach1 cells using Qiagen Spin Miniprep Kit (Catalog  
981 no. 27106) followed by chemical transformation into *SBW25*. *SBW25*  
982 was made chemically competent by washing a culture at OD<sub>600</sub> of  
983 0.3 with a solution of 10% glycerol two times, then resuspending in  
984 500 μL of 10% glycerol. The plasmid DNA is added to 80 μL of the  
985 cell suspension and kept at 4°C for 30 minutes, then the cells were  
986 electroporated with 1600 V, 200 Ω, and 25 μF. The cells were immedi-  
987 ately resuspended in 300 μL of SOC Broth (Fischer Scientific Catalog  
988 No. MT46003CR), recovered for 2 hours at 30°C in a shaking incu-  
989 bator, and plated onto 1.5% LB Agar plates with 50  $\frac{\mu\text{g}}{\text{mL}}$  Kanamycin.  
990 Again, three to six colonies of each strain have their reporter cassette  
991 sequenced at Eurofins Genomics and simultaneously glycerol stocks of  
992 each colony is prepared for long term storage.

993 **Photobleaching of Spectracide.** Spectracide malathion insect  
994 spray concentrate (Spectracide Catalog no. 071121309006) was uti-  
995 lized as the environmentally relevant source of malathion for the re-  
996 porter library testing and contains 50% malathion. Spectracide is an  
997 opaque liquid. We found that we can remove the opaque substances  
998 by photobleaching a 5% Spectracide solution (in LB) in a Synergy H1

plate reader (Biotek), at 30°C and 800 r.p.m. OD<sub>600</sub> and fluorescence (excitation 485nm, emission 528nm) were measured every 3 minutes for 8 hours. To ensure malathion remained in solution after photobleaching, the mass spectrum was analyzed at the University of California, Santa Barbara Mass Spectroscopy Facility. From this we determined that malathion is stable for the course of the photobleaching (Supplementary Figures 7 to 19).

**Plate reader assays to measure response curves and doubling times.** Scrapes of culture from glycerol stocks of each strain were used to inoculate 3 mL of LB (Kanamycin 50  $\frac{\mu\text{g}}{\text{mL}}$ ) in 10 mL 24 deep-well plate sealed with a breathable film (Spectrum Chemical Catalog no. 630-11763) and grown at 30°C overnight in a shaker incubator. The overnight cultures were diluted to an OD<sub>600</sub> of 0.1 in 2 mL of LB and the cultures were grown for an additional 2 hours. 250  $\mu\text{L}$  of this culture was then transferred to a 96 well optically-transparent microtiter plate. Photobleached spectracide (50% malathion) is then introduced (if relevant) to the cultures in the wells to give the desired concentration of malathion, and grown in a Synergy H1 plate reader (Biotek), at 30°C and 800 r.p.m. OD<sub>600</sub> and *sfGFP* (excitation 485nm, emission 528nm) was measured every 3 minutes for 48 hours. Each data point in a response curve was generated by normalizing the *sfGFP* signal (arbitrary fluorescence units) by the OD<sub>600</sub> to give the average per cell fluorescence, and only the data points before cell death (due to nutrient depletion or media evaporation) are used. The strain growth rates were calculated as  $\ln(\text{initial OD}_{600}/\text{final OD}_{600})/(\text{t}_{\text{final}} - \text{t}_{\text{initial}})$ , where the initial OD<sub>600</sub> is the first measurement within the exponential phase and final OD<sub>600</sub> is the last measurement within the exponential phase. Then the strain doubling times were calculated as  $\ln(2)$  divided by the growth rate.

**Collection and cleanup of irrigation water treated with Spectracide.** Three cabbage plants were each potted in 5 gallon buckets with fresh soil (Harvest supreme) and a water catchment tray was placed under the plants to catch flow through. The first plant was sprayed with water containing no malathion and the flow through was collected in a 1 L pyrex bottle. The second plant was sprayed with a Spectracide (50% malathion) solution at a concentration of 1 fluid ounce per of gallon water – the maximum working concentration of Spectracide as recommended by the manufacturer. Lastly, the third plant was sprayed with the solution at 8 fluid ounces per gallon of water. Each plant was sprayed for one minute and the collected flow through from each plant were first strained using a 40  $\mu\text{m}$  cell strainer (VWR 76327-098) to remove large microorganisms and large particles. The strained samples were then centrifuged to separate dense, soil particles from the Spectracide solution. Finally, the supernatant was vacuum filtered through a 0.22  $\mu\text{m}$  membrane before induction of the reporters. The protocol for induction of the reporters with the irrigation water is the same as above.

**Computing the dynamic mode decomposition.** We now discuss the details of applying dynamic mode decomposition (DMD) to time-series data obtained from sequencing. As mentioned previously, many algorithms have been developed to compute the DMD modes, eigenvalues, and amplitudes, and a key requirement of almost all of the techniques is that the time points are spaced uniformly in time. In our work we begin by collecting the data for a single experimental condition into a time-ordered matrix,  $\mathbf{X}$ , which contains a total of  $m \times r$  data snapshots for a data set with  $m$  time points and  $r$  replicates. For response to malathion, each  $\mathbf{x}_i^{(j)}$  corresponds to the gene expression vector at time  $i$  in replicate  $j$  and is in the  $((i + m) \times j)$ th column of the data matrix  $\mathbf{X}$  where  $i \in \{0, 1, \dots, m - 1\}$  and  $j \in \{1, 2, \dots, r\}$ . For gene expression data obtained from RNA-seq, each data snapshot typically contains thousands of rows denoted by  $n$ . The  $n \times rm$  data matrix for the response to malathion is then given by

$$\mathbf{X}_{\text{malathion}} = \begin{bmatrix} \left| \mathbf{x}_0^{(1)} \right. & \left| \mathbf{x}_1^{(1)} \right. & \dots & \left| \mathbf{x}_{m-1}^{(1)} \right. & \left| \mathbf{x}_0^{(2)} \right. & \dots & \left| \mathbf{x}_{m-1}^{(2)} \right. & \dots \end{bmatrix} \quad (1)$$

where each  $\mathbf{x}_i \in \mathbb{R}^n$  represents the gene expression given in transcripts per million (TPM) from the malathion condition. Similarly, the data matrix for the control condition is constructed. The fold change data matrix,  $\mathbf{Z}$ , is subsequently computed as  $\mathbf{Z} = \mathbf{X}_{\text{malathion}} \oslash \mathbf{X}_{\text{control}}$ , where  $\oslash$  denotes the Hadamard (element-wise) division of two matrices. Next we compute the mean-subtracted and standard deviation-

normalized data matrix  $\bar{\mathbf{Z}}$

$$\bar{\mathbf{Z}} = \begin{bmatrix} \frac{\mathbf{z}_0 - \boldsymbol{\mu}_{0:m-1}}{\sigma_{0:m-1}^2} & \frac{\mathbf{z}_1 - \boldsymbol{\mu}_{0:m-1}}{\sigma_{0:m-1}^2} & \dots & \frac{\mathbf{z}_{m-1} - \boldsymbol{\mu}_{0:m-1}}{\sigma_{0:m-1}^2} \end{bmatrix} \quad (2)$$

where  $\boldsymbol{\mu}_{0:m-1}$  is the vector of time-averages of each gene and  $\sigma_{0:m-1}^2$  is the vector of time-standard deviations of each gene. The divisions in Eq. (2) are performed element-wise. We see that  $\bar{\mathbf{Z}}$  is obtained by removing the time-averages from each gene and standardizing the time-variances of each gene. The mean subtraction operation is motivated by the fact that the mean of the data corresponds to the eigenvalue  $\lambda = 1$ , which is always an eigenvalue of the Koopman operator, the operator that DMD ultimately aims to approximate [86], and not one we are particularly interested in. The normalization by the standard deviation is performed so that the magnitude of the fold change has no implication on the connectivity of the learned dynamical system.

The algorithm we make use of to compute the dynamic mode decomposition (and the approximation of the Koopman operator) is exact DMD [50], which aims to identify the best-fit linear relationship between the following time-shifted data matrices

$$\bar{\mathbf{Z}}_p = [\bar{\mathbf{z}}_0 \quad \bar{\mathbf{z}}_1 \quad \dots \quad \bar{\mathbf{z}}_{m-2}], \quad \bar{\mathbf{Z}}_f = [\bar{\mathbf{z}}_1 \quad \bar{\mathbf{z}}_2 \quad \dots \quad \bar{\mathbf{z}}_{m-1}]$$

such that

$$\bar{\mathbf{Z}}_f = \mathbf{K}\bar{\mathbf{Z}}_p + \mathbf{r} \quad (3)$$

where  $\mathbf{r}$  is the residual due to  $\mathbf{K}$  only providing an approximation of the actual dynamics. Note that there are  $n^2$  unknown parameters in  $\mathbf{K}$  and  $n \times m$  equations in Eq. (3). The residual is then minimized by Exact DMD (in the least squares sense) by first considering the reduced singular value decomposition (SVD) of  $\hat{\mathbf{Z}}_p = \mathbf{U}\boldsymbol{\Sigma}\mathbf{W}^\top$  where  $\boldsymbol{\Sigma} \in \mathbb{R}^{k \times k}$ . As the number of time points,  $m$ , obtained from sequencing is typically much less than the number of genes,  $n$ , we keep  $k \leq m$  singular values. Recognizing that minimizing the residual requires it to be orthogonal to the left singular vectors, we can pre-multiply (3) with  $\mathbf{U}^\top$  to obtain

$$\mathbf{U}^\top \bar{\mathbf{Z}}_f = \mathbf{K}\mathbf{U}\boldsymbol{\Sigma}\mathbf{W}^\top. \quad (4)$$

Rearranging the above equation, it is shown that  $\mathbf{K}$  is related to  $\hat{\mathbf{K}}$  through a similarity transformation as shown in Eq. (5)

$$\hat{\mathbf{K}} = \mathbf{U}^\top \bar{\mathbf{Z}}_f \mathbf{W}\boldsymbol{\Sigma}^{-1} = \mathbf{U}^\top \mathbf{K}\mathbf{U} \quad (5)$$

meaning that the eigenvalues of  $\hat{\mathbf{K}}$ ,  $\lambda$ , are equivalent to the  $k$  leading eigenvalues of  $\mathbf{K}$  while the eigenvectors of  $\hat{\mathbf{K}}$ ,  $\mathbf{s}$ , are related to the  $k$  leading eigenvectors of  $\mathbf{K}$ ,  $\mathbf{v}$ , by  $\mathbf{v} = \mathbf{U}\mathbf{s}$ . This eigendecomposition then allows the fold change response to be written as the following spectral decomposition

$$\hat{\mathbf{z}}_i = \sum_{j=1}^k \mathbf{v}_j \lambda_j^i \mathbf{b}_j = \mathbf{V}\boldsymbol{\Lambda}^i \mathbf{b} \quad (6)$$

where  $\mathbf{V}$  is a matrix whose columns are the eigenvectors (DMD modes)  $\mathbf{v}_j$ , and  $\mathbf{b}$  is a vector of amplitudes corresponding to the gene expression at the initial time point as  $\mathbf{b} = \mathbf{V}^\dagger \hat{\mathbf{z}}_0$ . Here  $\dagger$  represents the Moore-Penrose pseudoinverse of a matrix.

Using the above spectral decomposition, the modes can then be evolved in time for  $m - 1$  time steps to reconstruct the data from knowledge of the initial condition. Evolving past the  $m$ th time point allows for forecasting of the fold change response. To measure the accuracy of reconstruction we use the coefficient of determination

$$R^2 = 1 - \frac{\sum_{i=0}^m (\hat{\mathbf{z}}_i - \bar{\mathbf{z}}_i)}{\sum_{i=0}^m (\hat{\mathbf{z}}_i - \bar{\mathbf{z}})} \quad (7)$$

where  $\bar{\mathbf{z}}$  is the vector of each gene's mean expression, formally  $\bar{\mathbf{z}}^{(j)} = \sum_{k=0}^m \hat{\mathbf{z}}_k^{(j)}$ , and  $\bar{\mathbf{z}}_k = \mathbf{K}^k \hat{\mathbf{z}}_0$  is the prediction of  $\hat{\mathbf{z}}_k$  given by the model starting from the initial condition.

**Computing the gene sampling weights.** Here we describe our methodology for ranking genes based on their contribution to the observability of the dynamical system learned via dynamic mode decomposition. We start by introducing the energy of a signal in discrete-time as

$$E_y = \sum_{i=0}^{\infty} \mathbf{y}_i^\top \mathbf{y}_i \quad (8)$$

which is closely related to the idea of energy in the physical sense and where  $\mathbf{y} = \mathbf{W}\bar{\mathbf{z}}$  are measurements of the system state and  $\mathbf{W} \in$

1116  $\mathbb{R}^{p \times n}$ . Rewriting the signal energy (8) using the recursion for  $\mathbf{y}$  given  
 1117 as  $\mathbf{y}_t = \mathbf{W}\mathbf{K}^t\bar{\mathbf{z}}_0$ , we can reveal the connection between energy and  
 1118 observability

$$\begin{aligned} E_y &= \sum_{i=0}^{\infty} \bar{\mathbf{z}}_0^\top \mathbf{K}^i \mathbf{W}^\top \mathbf{W} \mathbf{K}^i \bar{\mathbf{z}}_0 \\ &= \bar{\mathbf{z}}_0^\top \left( \sum_{i=0}^{\infty} \mathbf{K}^i \mathbf{W}^\top \mathbf{W} \mathbf{K}^i \right) \bar{\mathbf{z}}_0 \\ &= \bar{\mathbf{z}}_0^\top \mathcal{X}_o \bar{\mathbf{z}}_0 \end{aligned} \quad (9)$$

1119 where  $\mathcal{X}_o$  is the infinite-horizon observability gramian, a symmetric  
 1120 matrix that is unique if the eigenvalues of  $\mathbf{K}$  all have magnitude less  
 1121 than 1. The observability gramian describes how much gain will be  
 1122 attained by a system's output,  $\mathbf{y}$ , given an initial condition  $\bar{\mathbf{z}}_0$ . It  
 1123 simultaneously gives a measure of how well the initial condition  $\bar{\mathbf{z}}_0$  can  
 1124 be estimated given only measurements of the system state  $y$  [75].

1125 We use the observability gramian along with the measure of energy it  
 1126 provides to optimize for the gene sampling weights in the rows of  $\mathbf{W}$   
 1127 that maximize the signal energy  $E_y$ . Formally, the objective function  
 1128 is given as

$$\begin{aligned} &\max_{\mathbf{W} \in \mathbb{R}^{p \times n}} \bar{\mathbf{z}}_0^\top \mathcal{X}_o \bar{\mathbf{z}}_0 \\ &\text{subject to } \mathbf{W}\mathbf{W}^\top = \mathbf{I}_{p \times p}. \end{aligned} \quad (10)$$

1129 where we seek the matrix  $\mathbf{W}$  that maximizes the observability of the  
 1130 cell state  $\bar{\mathbf{z}}_0$ . The constraint above enforces the following three points,  
 1131 i) the length of each row vector in  $\mathbf{W}$  is not important, we are only  
 1132 concerned with the direction and the constraint sets the length of each  
 1133 row vector to be equal to 1, ii) the maximization problem is well-posed,  
 1134 i.e. the objective cannot blow up to infinity with the length constraint,  
 1135 and iii) the rows of  $\mathbf{W}$  form  $p$  vectors of an orthonormal basis for  $\mathbb{R}^p$ ,  
 1136 i.e.  $\mathbf{W}\mathbf{W}^\top = \mathbf{I}_{p \times p}$ . Each row vector in  $\mathbf{W}$  can then be viewed as a set  
 1137 of weights, each orthogonal to one another, that rank genes based on  
 1138 their contribution to the observability of the system. The optimization  
 1139 problem (10) represents a quadratic program with linear constraints,  
 1140 and the rows of  $\mathbf{W}$  which maximize the objective are the  $p$  eigenvectors  
 1141 corresponding to the  $p$  eigenvalues with highest magnitude of the Gram  
 1142 matrix

$$\mathbf{G} = \sum_{i=0}^{\infty} \mathbf{K}^i \bar{\mathbf{z}}_0 \bar{\mathbf{z}}_0^\top \mathbf{K}^{i\top}. \quad (11)$$

1143 Since  $\mathbf{G} \in \mathbb{R}^{n \times n}$  is a sum of quadratic forms, the result is that  $\mathbf{G}$   
 1144 has non-negative, real-valued eigenvalues. If the eigendecomposition is  
 1145  $\mathbf{G} = \mathbf{Q}\mathbf{D}\mathbf{Q}^{-1}$ , then the solution to the optimization problem Eq. (10)  
 1146 is

$$\mathbf{W} = \begin{bmatrix} \mathbf{q}_1^\top \\ \vdots \\ \mathbf{q}_p^\top \end{bmatrix} \quad (12)$$

1147 where  $\mathbf{q}_1$  through  $\mathbf{q}_p$  are the top eigenvectors of the Gram matrix  $\mathbf{G}$ .  
 1148 The proof of the solution to the optimization problem is provided in the  
 1149 Supplementary Information. The single set of gene sampling weights  
 1150 that maximize the observability are precisely  $\mathbf{q}_1$  and from here on out  
 1151 we call these weights  $\mathbf{w}$ .

1152 Since transcriptomic data sets typically have few initial conditions, i.e.  
 1153 biological and technical replicates, before solving for  $\mathbf{w}$  we enrich our  
 1154 data set with  $N$  synthetic initial conditions that are randomly sampled  
 1155 as  $Uniform(\min(\bar{\mathbf{z}}_0^{(j)}), \max(\bar{\mathbf{z}}_0^{(j)}))$  where  $j$  in  $\{1, 2, \dots, r\}$  and  $r$  is the  
 1156 number of replicates. The motivation for the artificial data generation  
 1157 is given in [87], where it is shown that artificially generated data points  
 1158 improved the estimate of the DMD model when the data set is affected  
 1159 by noise.  $N$  is chosen to be equal to the number of genes to ensure  
 1160 the matrix of initial conditions has full rank. Another issue that we  
 1161 have addressed are the instabilities present in the DMD eigenvalues.  
 1162 Consequently, the observability gramian is not unique and the sum in  
 1163 Eq. (11) diverges to infinity. To mend this issue, we compute the  
 1164 finite-horizon Gram matrix, where the sum in Eq. (9) and Eq. (11)  
 1165 is from 0 to  $m$ . This allows for the computation of the finite-horizon  
 1166 signal energy from Eq. (9) where the bounds on the sum are now from  
 1167  $i = 0$  to  $i = m$ .

1168 Once  $\mathbf{w}$  is obtained by solving Eq. (10), then measurements  $y_t$ , for  $t$   
 1169 in  $\{0, 1, \dots, T\}$ , are generated from  $y_t = \mathbf{w}^\top \mathbf{K}^t \bar{\mathbf{z}}_0$  while keeping only

the  $q$  elements of  $\mathbf{w}$  with largest magnitude as nonzero. All other  
 elements of  $\mathbf{w}$  are set to zero to simulate the sampling of only selected  
 genes. To reconstruct  $\bar{\mathbf{z}}_0$  using only the measurements, we form the  
 following observability matrix from the known sampling weights,  $\mathbf{w}$   
 and the dynamics matrix  $\mathbf{K}$

$$\begin{bmatrix} y_0 \\ y_1 \\ y_2 \\ \vdots \\ y_T \end{bmatrix} = \begin{bmatrix} \mathbf{w}^\top \\ \mathbf{w}^\top \mathbf{K} \\ \mathbf{w}^\top \mathbf{K}^2 \\ \vdots \\ \mathbf{w}^\top \mathbf{K}^T \end{bmatrix} \bar{\mathbf{z}}_0 = \mathcal{O}_T \bar{\mathbf{z}}_0 \quad (13)$$

and using the Moore-Penrose pseudoinverse we can obtain an estimate  
 of the initial condition as follows

$$\mathcal{O}_T^\dagger \begin{bmatrix} y_0 \\ y_1 \\ y_2 \\ \vdots \\ y_T \end{bmatrix} = \hat{\mathbf{z}}_0 \approx \bar{\mathbf{z}}_0. \quad (14)$$

Increasing  $q$  while keeping  $T$  constant results in increasing reconstruction  
 accuracy until a critical value of  $q$  such that the reconstruction  
 accuracy plateaus; a similar scenario holds for keeping  $q$  constant and  
 increasing  $T$ . When both  $T$  and  $q$  surpass the critical values, perfect  
 reconstruction may be achieved.

When the computation of the Gram matrix,  $\mathbf{G}$ , is not computationally  
 feasible, as can be the case when the dimensionality of the data are rela-  
 tively high compared to that of bacterial transcription networks that  
 we are dealing with here, the reduced order dynamics given by DMD  
 can be used to compute an approximation to the leading eigenvalues  
 and eigenvectors. The reduced order  $\hat{\mathbf{G}}$  is then given by

$$\hat{\mathbf{G}} = \sum_{i=0}^{\infty} \hat{\mathbf{K}}^i \mathbf{U}^\top \bar{\mathbf{z}}_0 \bar{\mathbf{z}}_0^\top \mathbf{U} \hat{\mathbf{K}}^{i\top} \quad (15)$$

where  $\hat{\mathbf{K}}$  and  $\mathbf{U}$  are given in Eq. (5). Supplementary Figure 2 shows  
 the approximation of the leading eigenvalues and eigenvectors of  $\mathbf{G}$  by  
 $\hat{\mathbf{G}}$ .

**Fitting the response curves to Hill kinetics.** The malathion  
 response curves for each sensor were fit to Hill functions of the form

$$y = y_{\min} + (y_{\max} - y_{\min}) \frac{u^n}{K_M + u^n} = H_{\text{act}}(u) \quad (16)$$

for activated sensors and

$$y = y_{\max} - (y_{\max} - y_{\min}) \frac{u^n}{K_M + u^n} = H_{\text{rep}}(u) \quad (17)$$

for repressed sensors. The parameter  $n$  is a measure of ultrasensi-  
 tivity [88] or how steep the response curve is and is known as the Hill  
 coefficient. The Michaelis constant,  $K_M$ , is equivalent to the malathion  
 concentration at which the sensor response,  $y$  (measured in OD nor-  
 malized arbitrary fluorescence units), is half of  $(y_{\max} - y_{\min})$ . The  
 input  $u$  represents the malathion concentration in millimolar.  
 The objective function used to determine the parameters of the Hill  
 equations is shown below

$$\min_{c, K_M} \sum_{(i=1)}^{n_c} (y_i - H(u_i))^2 \quad (18)$$

where  $H$  is the Hill function of the activator or repressor and  $n_c$  is the  
 number of data points and is equivalent to the number of malathion  
 concentrations times the number of replicates. The Levenberg-  
 Marquadt algorithm is used to solve a nonlinear least squares problem  
 to obtain a solution to optimization problem (18).

**Approximating reference curves with genetic basis functions.**  
 Here we describe the treatment of the transcriptional sensors as genetic  
 basis functions and how to use them to approximate reference curves.  
 For this task, we work with the mean fold change of malathion re-  
 sponse at 2.24 mM with respect to the zero malathion condition. The  
 mean is taken across biological replicates for each of the  $n_s$  reporters:  
 OD normalized arbitrary fluorescence units (which can alternatively  
 be viewed as average per cell fluorescence). We start by collecting the

1215 mean fold change response of each sensor at a particular instant in  
1216 time,  $\bar{y}_i$ , into a  $n_s \times M$  data matrix,  $\mathbf{Y}$

$$\mathbf{Y} = \begin{bmatrix} | & | & & | \\ \bar{y}_0 & \bar{y}_1 & \dots & \bar{y}_{M-1} \\ | & | & & | \end{bmatrix} \quad (19)$$

1217 where  $M$  denotes the number of time points. Then a desired response  
1218 vector,  $\mathbf{s}$ , is generated corresponding to the desired reference trajectory.  
1219 For example, the first reference trajectory (Figure 5) used in this work  
1220 is generated by

$$s_1(t) = 1.5 + 2.43e^{-0.44t} \sin 0.33t \quad (20)$$

1221 which corresponds to a second-order underdamped system subject to  
1222 a step input of 1.5 (arbitrary units). The second reference trajectory  
1223 is generated by the superposition of radial basis functions

$$s_2(t) = e^{-\frac{(t-1)^2}{0.5}} + 0.2(e^{-\frac{(t-9)^2}{1.5}} + e^{-\frac{(t-15)^2}{1.5}} + e^{-\frac{(t-21)^2}{1.5}}) + 1. \quad (21)$$

1224 The two functions were sampled at the time points corresponding to  
1225 the sensor response measurements to obtain the vector  $\mathbf{s}$ .

1226 Attending to realistic constraints surrounding genetic circuit design,  
1227 data acquisition, and cost, we seek to identify the fewest combination  
1228 of transcriptional sensors that can be used to recapitulate the desired  
1229 response  $\mathbf{s}$ . This can be described mathematically using the following  
1230 cost function

$$\min_{\beta \in \mathbb{R}_{\geq 0}^{n_s}} \|\mathbf{s} - \beta^T \mathbf{Y}\|_2^2 + \gamma \|\beta\|_1 \quad (22)$$

1231 where  $\|\bullet\|_2$  is the Euclidean norm, quantifying the distance of a vector  
1232 from the origin. The term  $\|\beta\|_1$  is the 1-norm and adding this quantity  
1233 to the cost function has been shown to promote sparsity in the mini-  
1234 mizer [89]. As  $\gamma$  increases, the number of sensors to recapitulate the  
1235 desired response decreases. However if  $\gamma$  is too large, the sparse set of  
1236 coefficients may be unable to accurately describe  $\mathbf{s}$ . This optimization  
1237 problem represents a linear program with linear constraints and the  
1238 minimizer is obtained using the splitting conic solver [90].

## 1239 Data availability

1240 The data generated from RNA sequencing  
1241 are available at GEO Accession GSE200822:  
1242 [www.ncbi.nlm.nih.gov/geo/query/acc.cgi?acc=GSE200822](http://www.ncbi.nlm.nih.gov/geo/query/acc.cgi?acc=GSE200822). The  
1243 DNA sequencing data for the reporter strains and the kinetic  
1244 data generated from the spectrophotometer are available at:  
1245 [https://github.com/AqibHasnain/transcriptome-dynamics-dmd-](https://github.com/AqibHasnain/transcriptome-dynamics-dmd-observability)  
1246 [observability](https://github.com/AqibHasnain/transcriptome-dynamics-dmd-observability).

## 1247 Code availability

1248 All codes used in this study are available at:  
1249 [https://github.com/AqibHasnain/transcriptome-dynamics-dmd-](https://github.com/AqibHasnain/transcriptome-dynamics-dmd-observability)  
1250 [observability](https://github.com/AqibHasnain/transcriptome-dynamics-dmd-observability) or available from the author's upon request.

## 1251 Acknowledgments

1252 This work was supported by DARPA, AFRL under contract  
1253 numbers FA8750-17-C-0229, HR001117C0092, HR001117C0094,  
1254 DEAC0576RL01830. Any opinions, findings, conclusions, or recom-  
1255 mendations expressed in this material are those of the authors and  
1256 do not necessarily reflect the views of the Defense Advanced Research  
1257 Project Agency, the Department of Defense, or the United States  
1258 government. This work was also funded, in part, by the Department  
1259 of Energy's Biological and Environmental Research office, under the  
1260 DOE Scientific Focus Area: Secure Biosystems Design project, via  
1261 funding from Pacific Northwest National Laboratory subcontract  
1262 numbers 545157 and 490521. This work received partially funding  
1263 from the Army Young Investigator Award W911NF-20-1-0165 and the  
1264 Army Research Office Grants W911NF-19-D-001, W911-NF-19-F-037,  
1265 and W911-NF-19-0026. We acknowledge the use of the Biological  
1266 Nanostructures Laboratory within the California NanoSystems  
1267 Institute, supported by the University of California, Santa Barbara  
1268 and the University of California, Office of the President. We thank

Ryan Chambers, Trevor Marks, and Kirk Fields for construction of 1269  
the vacuum manifold. We thank Jamiree Harrison for engaging in 1270  
insightful discussions on linear systems theory. 1271

## 1272 Author contributions

A.H. and E.Y. designed research and experiments. A.H. performed 1273  
experiments, performed formal analysis, analyzed data, and wrote the 1274  
manuscript. S.B. assisted with RNA-seq sample collection and virtual 1275  
sensor analysis. D.M.J. assisted with cloning of reporter strains; J.S. 1276  
performed the mRNA library prep and sequencing; S.B.H. assisted 1277  
in conceptualization and designing the time-series RNA-seq experi- 1278  
ment; E.Y. supervised research and secured funding. A.H. revised the 1279  
manuscript with inputs from all authors. 1280

## 1281 Competing interests

The authors declare no competing interests. 1282





# Bibliography

- [1] Drew Endy. Foundations for engineering biology. *Nature*, 438(7067):449–453, 2005.
- [2] Timothy S Gardner, Charles R Cantor, and James J Collins. Construction of a genetic toggle switch in *Escherichia coli*. *Nature*, 403(6767):339–342, 2000.
- [3] Michael B Elowitz and Stanislas Leibler. A synthetic oscillatory network of transcriptional regulators. *Nature*, 403(6767):335–338, 2000.
- [4] Farren J Isaacs, Daniel J Dwyer, Chunming Ding, Dmitri D Perouchine, Charles R Cantor, and James J Collins. Engineered riboregulators enable post-transcriptional control of gene expression. *Nature biotechnology*, 22(7):841–847, 2004.
- [5] Travis S Bayer and Christina D Smolke. Programmable ligand-controlled riboregulators of eukaryotic gene expression. *Nature biotechnology*, 23(3):337–343, 2005.
- [6] Amin Espah Borujeni, Dennis M Mishler, Jingzhi Wang, Walker Huso, and Howard M Salis. Automated physics-based design of synthetic riboswitches from diverse rna aptamers. *Nucleic acids research*, 44(1):1–13, 2016.
- [7] Anselm Levskaya, Aaron A Chevalier, Jeffrey J Tabor, Zachary Booth Simpson, Laura A Lavery, Matthew Levy, Eric A Davidson, Alexander Scouras, Andrew D Ellington, Edward M Marcotte, et al. Engineering *Escherichia coli* to see light. *Nature*, 438(7067):441–442, 2005.
- [8] Jeong Wook Lee, Dokyun Na, Jong Myoung Park, Joungmin Lee, Sol Choi, and Sang Yup Lee. Systems metabolic engineering of microorganisms for natural and non-natural chemicals. *Nature chemical biology*, 8(6):536–546, 2012.
- [9] William J Holtz and Jay D Keasling. Engineering static and dynamic control of synthetic pathways. *Cell*, 140(1):19–23, 2010.
- [10] Ximing Li, Luna Rizik, Valeriia Kravchik, Maria Khoury, Netanel Korin, and Ramez Daniel. Synthetic neural-like computing in microbial consortia for pattern recognition. *Nature communications*, 12(1):1–12, 2021.
- [11] D Ewen Cameron, Caleb J Bashor, and James J Collins. A brief history of synthetic biology. *Nature Reviews Microbiology*, 12(5):381–390, 2014.
- [12] Adrian L Shlursczyk, Allen Lin, and Ron Weiss. Foundations for the design and implementation of synthetic genetic circuits. *Nature Reviews Genetics*, 13(6):406–420, 2012.
- [13] Jeff Hasty, David McMillen, and James J Collins. Engineered gene circuits. *Nature*, 420(6912):224–230, 2002.
- [14] Stanley Tabor and Charles C Richardson. A bacteriophage t7 rna polymerase/promoter system for controlled exclusive expression of specific genes. *Proceedings of the National Academy of Sciences*, 82(4):1074–1078, 1985.
- [15] Heidi Redden, Nicholas Morse, and Hal S Alper. The synthetic biology toolbox for tuning gene expression in yeast. *FEMS yeast research*, 15(1):1–10, 2015.
- [16] Rafael Silva-Rocha and Víctor de Lorenzo. Mining logic gates in prokaryotic transcriptional regulation networks. *FEBS letters*, 582(8):1237–1244, 2008.
- [17] Goksel Misirlı, Jennifer Hallinan, Matthew Pocock, Phillip Lord, James Alastair McLaughlin, Herbert Sauro, and Anil Wipat. Data integration and mining for synthetic biology design. *ACS synthetic biology*, 5(10):1086–1097, 2016.
- [18] Ayaan Hossain, Eriberto Lopez, Sean M Halper, Daniel P Cetnar, Alexander C Reis, Devin Strickland, Eric Klavins, and Howard M Salis. Automated design of thousands of nonrepetitive parts for engineering stable genetic systems. *Nature biotechnology*, 38(12):1466–1475, 2020.
- [19] Adam J Meyer, Thomas H Segall-Shapiro, Emerson Glassey, Jing Zhang, and Christopher A Voigt. *Escherichia coli* “marionette” strains with 12 highly optimized small-molecule sensors. *Nature chemical biology*, 15(2):196–204, 2019.
- [20] Travis L La Fleur, Ayaan Hossain, and Howard M Salis. Automated model-predictive design of synthetic promoters to control transcriptional profiles in bacteria. *bioRxiv*, 2021.
- [21] Alan Costello and Ahmed H Badran. Synthetic biological circuits within an orthogonal central dogma. *Trends in biotechnology*, 39(1):59–71, 2021.
- [22] Mario A Marchisio and Jörg Stelling. Automatic design of digital synthetic gene circuits. *PLoS computational biology*, 7(2):e1001083, 2011.
- [23] Alec AK Nielsen, Bryan S Der, Jonghyeon Shin, Prashant Vaidyanathan, Vanya Paralanov, Elizabeth A Strychalski, David Ross, Douglas Densmore, and Christopher A Voigt. Genetic circuit design automation. *Science*, 352(6281), 2016.
- [24] Ye Chen, Shuyi Zhang, Eric M Young, Timothy S Jones, Douglas Densmore, and Christopher A Voigt. Genetic circuit design automation for yeast. *Nature Microbiology*, 5(11):1349–1360, 2020.
- [25] Tobias Schladt, Nicolai Engelmann, Erik Kubaczka, Christian Hochberger, and Heinz Koeppl. Automated design of robust genetic circuits: Structural variants and parameter uncertainty. *ACS Synthetic Biology*, 2021.
- [26] Christopher A Voigt. Genetic parts to program bacteria. *Current opinion in biotechnology*, 17(5):548–557, 2006.
- [27] Luc Bousse. Whole cell biosensors. *Sensors and Actuators B: Chemical*, 34(1-3):270–275, 1996.
- [28] Michael Moraskie, Harun Roshid, Gregory O’Connor, Emre Dikici, Jean-Marc Zingg, Sapna Deo, and Sylvia Daunert. Microbial whole-cell biosensors: Current applications, challenges, and future perspectives. *Biosensors and Bioelectronics*, page 113359, 2021.
- [29] Yizhi Song, Cordelia PN Rampley, Xiaoyu Chen, Fawen Du, Ian P Thompson, and Wei E Huang. Application of bacterial whole-cell biosensors in health. *Handbook of Cell Biosensors*, pages 945–961, 2022.
- [30] Howard Salis, Alvin Tamsir, and Christopher Voigt. Engineering bacterial signals and sensors. *Bacterial Sensing and Signaling*, 16:194–225, 2009.
- [31] Baojun Wang, Mauricio Barahona, and Martin Buck. A modular cell-based biosensor using engineered genetic logic circuits to detect and integrate multiple environmental signals. *Biosensors and Bioelectronics*, 40(1):368–376, 2013.

- [32] Huiqing Chong and Chi Bun Ching. Development of colorimetric-based whole-cell biosensor for organophosphorus compounds by engineering transcription regulator dmpr. *ACS synthetic biology*, 5(11):1290–1298, 2016.
- [33] Brigitta Kurenbach, Delphine Marjoshi, Carlos F Amábile-Cuevas, Gayle C Ferguson, William Godsoe, Paddy Gibson, and Jack A Heinemann. Sublethal exposure to commercial formulations of the herbicides dicamba, 2, 4-dichlorophenoxyacetic acid, and glyphosate cause changes in antibiotic susceptibility in escherichia coli and salmonella enterica serovar typhimurium. *MBio*, 6(2):e00009–15, 2015.
- [34] Eric VanArsdale, Chen-yu Tsao, Yi Liu, Chen-yu Chen, Gregory F Payne, and William E Bentley. Redox-based synthetic biology enables electrochemical detection of the herbicides dicamba and roundup via rewired escherichia coli. *ACS sensors*, 4(5):1180–1184, 2019.
- [35] Yang-Chun Yong and Jian-Jiang Zhong. A genetically engineered whole-cell pigment-based bacterial biosensing system for quantification of n-butyryl homoserine lactone quorum sensing signal. *Biosensors and Bioelectronics*, 25(1):41–47, 2009.
- [36] J Christopher Anderson, Elizabeth J Clarke, Adam P Arkin, and Christopher A Voigt. Environmentally controlled invasion of cancer cells by engineered bacteria. *Journal of molecular biology*, 355(4):619–627, 2006.
- [37] Tal Danino, Arthur Prindle, Gabriel A Kwong, Matthew Skalak, Howard Li, Kaitlin Allen, Jeff Hasty, and Sangeeta N Bhatia. Programmable probiotics for detection of cancer in urine. *Science translational medicine*, 7(289):289ra84–289ra84, 2015.
- [38] Xinyi Wan, Behide Saltepe, Luyang Yu, and Baojun Wang. Programming living sensors for environment, health and biomanufacturing. *Microbial biotechnology*, 2021.
- [39] Michael I Love, Wolfgang Huber, and Simon Anders. Moderated estimation of fold change and dispersion for rna-seq data with deseq2. *Genome biology*, 15(12):1–21, 2014.
- [40] Mark D Robinson, Davis J McCarthy, and Gordon K Smyth. edgeR: a bioconductor package for differential expression analysis of digital gene expression data. *Bioinformatics*, 26(1):139–140, 2010.
- [41] Nicholas J Schurch, Pietá Schofield, Marek Gierliński, Christian Cole, Alexander Sherstnev, Vijender Singh, Nicola Wrobel, Karim Gharbi, Gordon G Simpson, Tom Owen-Hughes, et al. How many biological replicates are needed in an rna-seq experiment and which differential expression tool should you use? *Rna*, 22(6):839–851, 2016.
- [42] Juliana Costa-Silva, Douglas Domingues, and Fabricio Martins Lopes. Rna-seq differential expression analysis: An extended review and a software tool. *PloS one*, 12(12):e0190152, 2017.
- [43] Jonathan M Raser and Erin K O’shea. Noise in gene expression: origins, consequences, and control. *Science*, 309(5743):2010–2013, 2005.
- [44] Sipko Van Dam, Urmo Vosa, Adriaan van der Graaf, Lude Franke, and Joao Pedro de Magalhaes. Gene co-expression analysis for functional classification and gene–disease predictions. *Briefings in bioinformatics*, 19(4):575–592, 2018.
- [45] Brian DO Anderson and John B Moore. *Optimal filtering*. Courier Corporation, 2012.
- [46] Donald J Chmielewski, Tasha Palmer, and Vasilios Manousiouthakis. On the theory of optimal sensor placement. *AICHE journal*, 48(5):1001–1012, 2002.
- [47] Joao P Hespanha. *Linear systems theory*. Princeton university press, 2018.
- [48] Peter J Schmid. Dynamic mode decomposition of numerical and experimental data. *Journal of fluid mechanics*, 656:5–28, 2010.
- [49] Clarence W Rowley, Igor Mezic, Shervin Bagheri, Philipp Schlatter, Dans Henningson, et al. Spectral analysis of nonlinear flows. *Journal of fluid mechanics*, 641(1):115–127, 2009.
- [50] Jonathan H Tu. *Dynamic mode decomposition: Theory and applications*. PhD thesis, Princeton University, 2013.
- [51] Milena Anguelova. *Observability and identifiability of nonlinear systems with applications in biology*. Chalmers Tekniska Hogskola (Sweden), 2007.
- [52] Aqib Hasnain, Nibodh Boddupalli, and Enoch Yeung. Optimal reporter placement in sparsely measured genetic networks using the koopman operator. In *2019 IEEE 58th Conference on Decision and Control (CDC)*, pages 19–24. IEEE, 2019.
- [53] Peter Flessel, PJE Quintana, and Kim Hooper. Genetic toxicity of malathion: a review. *Environmental and molecular mutagenesis*, 22(1):7–17, 1993.
- [54] WN Aldridge, JW Miles, DL Mount, and RD Verschoyle. The toxicological properties of impurities in malathion. *Archives of toxicology*, 42(2):95–106, 1978.
- [55] I Desi, Gy Dura, L Gönczi, Zs Kneffel, A Strohmayer, and Z Szabo. Toxicity of malathion to mammals, aquatic organisms and tissue culture cells. *Archives of environmental contamination and toxicology*, 3(4):410–425, 1975.
- [56] Jewell D Wilson. *Toxicological profile for malathion*. Agency for Toxic Substances and Disease Registry, 2003.
- [57] Muhammad Syafrudin, Risky Ayu Kristanti, Adhi Yuniarto, Tony Hadibarata, Jongtae Rhee, Wedad A Al-Onazi, Tahani Saad Algarni, Abdulhadi H Almarri, and Amal M Al-Mohaimed. Pesticides in drinking water—a review. *International Journal of Environmental Research and Public Health*, 18(2):468, 2021.
- [58] Bryson D Bennett, Elizabeth H Kimball, Melissa Gao, Robin Osterhout, Stephen J Van Dien, and Joshua D Rabinowitz. Absolute metabolite concentrations and implied enzyme active site occupancy in escherichia coli. *Nature chemical biology*, 5(8):593–599, 2009.
- [59] KayLynn Newhart. Environmental fate of malathion. *California Environmental Protection Agency*, 11:1–20, 2006.
- [60] Robert W Jackson, Gail M Preston, and Paul B Rainey. Genetic characterization of pseudomonas fluorescens sbw25 rsp gene expression in the phytosphere and in vitro. *Journal of bacteriology*, 187(24):8477–8488, 2005.
- [61] Ana Conesa, Pedro Madrigal, Sonia Tarazona, David Gomez-Cabrero, Alejandra Cervera, Andrew McPherson, Michał Wojciech Szcześniak, Daniel J Gaffney, Laura L Elo, Xuegong Zhang, et al. A survey of best practices for rna-seq data analysis. *Genome biology*, 17(1):1–19, 2016.
- [62] Maurice Filo and Mustafa Khammash. A class of simple biomolecular antithetic proportional-integral-derivative controllers. *bioRxiv*, pages 2021–03, 2021.
- [63] Uri Alon. *An introduction to systems biology: design principles of biological circuits*. CRC press, 2019.
- [64] Bingni W Brunton, Lise A Johnson, Jeffrey G Ojemann, and J Nathan Kutz. Extracting spatial–temporal coherent patterns in large-scale neural recordings using dynamic mode decomposition. *Journal of neuroscience methods*, 258:1–15, 2016.
- [65] Shara Balakrishnan, Aqib Hasnain, Nibodh Boddupalli, Dennis M Joshy, Robert G Egbert, and Enoch Yeung. Prediction of fitness in bacteria with causal jump dynamic mode decomposition. In *2020 American Control Conference (ACC)*, pages 3749–3756. IEEE, 2020.
- [66] Lawrence Sirovich. A novel analysis of gene array data: yeast cell cycle. *Biology Methods and Protocols*, 5(1):bpaa018, 2020.

- [67] Jake P Taylor-King, Asbjørn N Riseth, Will Macnair, and Manfred Claassen. Dynamic distribution decomposition for single-cell snapshot time series identifies subpopulations and trajectories during ipsc reprogramming. *PLoS computational biology*, 16(1):e1007491, 2020.
- [68] Aqib Hasnain, Subhrajit Sinha, Yuval Dorfan, Amin Espah Borujeni, Yongjin Park, Paul Maschhoff, Uma Saxena, Joshua Urrutia, Niall Gaffney, Diveena Becker, et al. A data-driven method for quantifying the impact of a genetic circuit on its host. In *2019 IEEE Biomedical Circuits and Systems Conference (BioCAS)*, pages 1–4. IEEE, 2019.
- [69] Orly Alter, Patrick O Brown, and David Botstein. Singular value decomposition for genome-wide expression data processing and modeling. *Proceedings of the National Academy of Sciences*, 97(18):10101–10106, 2000.
- [70] Justin Tan, Anand V Sastry, Karoline S Fremming, Sara P Björn, Alexandra Hoffmeyer, Sangwoo Seo, Bjørn G Voldborg, and Bernhard O Palsson. Independent component analysis of e. coli’s transcriptome reveals the cellular processes that respond to heterologous gene expression. *Metabolic Engineering*, 61:360–368, 2020.
- [71] Enoch Yeung, Soumya Kundu, and Nathan Hodas. Learning deep neural network representations for koopman operators of nonlinear dynamical systems. In *2019 American Control Conference (ACC)*, pages 4832–4839. IEEE, 2019.
- [72] Yang-Yu Liu, Jean-Jacques Slotine, and Albert-Laszlo Barabasi. Observability of complex systems. *Proceedings of the National Academy of Sciences*, 110(7):2460–2465, 2013.
- [73] Didier Georges. The use of observability and controllability gramians or functions for optimal sensor and actuator location in finite-dimensional systems. In *Proceedings of 1995 34th IEEE conference on decision and control*, volume 4, pages 3319–3324. IEEE, 1995.
- [74] PC Müller and HI Weber. Analysis and optimization of certain qualities of controllability and observability for linear dynamical systems. *Automatica*, 8(3):237–246, 1972.
- [75] Athanasios C Antoulas. *Approximation of large-scale dynamical systems*. SIAM, 2005.
- [76] Jason Ernst, Oded Vainas, Christopher T Harbison, Itamar Simon, and Ziv Bar-Joseph. Reconstructing dynamic regulatory maps. *Molecular systems biology*, 3(1):74, 2007.
- [77] The gene ontology resource: enriching a gold mine. *Nucleic Acids Research*, 49(D1):D325–D334, 2021.
- [78] Anton Khmelinskii, Philipp J Keller, Anna Bartosik, Matthias Meurer, Joseph D Barry, Balca R Mardin, Andreas Kaufmann, Susanne Trautmann, Malte Wachsmuth, Gislene Pereira, et al. Tandem fluorescent protein timers for in vivo analysis of protein dynamics. *Nature biotechnology*, 30(7):708–714, 2012.
- [79] Dominik Martin, Niklas Kühl, and Gerhard Satzger. Virtual sensors. *Business & Information Systems Engineering*, 63(3):315–323, 2021.
- [80] Gabriele Lillacci and Mustafa Khammash. Parameter estimation and model selection in computational biology. *PLoS computational biology*, 6(3):e1000696, 2010.
- [81] Anthony M Bolger, Marc Lohse, and Bjoern Usadel. Trimmomatic: a flexible trimmer for illumina sequence data. *Bioinformatics*, 30(15):2114–2120, 2014.
- [82] Nicolas L Bray, Harold Pimentel, Páll Melsted, and Lior Pachter. Near-optimal probabilistic rna-seq quantification. *Nature biotechnology*, 34(5):525–527, 2016.
- [83] Geo Pertea and Mihaela Pertea. Gff utilities: Gffread and gffcompare. *F1000Research*, 9, 2020.
- [84] Alon Zaslaver, Anat Bren, Michal Ronen, Shalev Itzkovitz, Ilya Kikoin, Seagull Shavit, Wolfram Liebermeister, Michael G Surette, and Uri Alon. A comprehensive library of fluorescent transcriptional reporters for escherichia coli. *Nature methods*, 3(8):623–628, 2006.
- [85] Carola Engler, Romy Kandzia, and Sylvestre Marillonnet. A one pot, one step, precision cloning method with high throughput capability. *PLoS one*, 3(11):e3647, 2008.
- [86] Igor Mezić. Spectral properties of dynamical systems, model reduction and decompositions. *Nonlinear Dynamics*, 41(1):309–325, 2005.
- [87] Subhrajit Sinha, Bowen Huang, and Umesh Vaidya. On robust computation of koopman operator and prediction in random dynamical systems. *Journal of Nonlinear Science*, 30(5):2057–2090, 2020.
- [88] Albert Goldbeter and Daniel E Koshland. An amplified sensitivity arising from covalent modification in biological systems. *Proceedings of the National Academy of Sciences*, 78(11):6840–6844, 1981.
- [89] Robert Tibshirani. Regression shrinkage and selection via the lasso. *Journal of the Royal Statistical Society: Series B (Methodological)*, 58(1):267–288, 1996.
- [90] Brendan O’donoghue, Eric Chu, Neal Parikh, and Stephen Boyd. Conic optimization via operator splitting and homogeneous self-dual embedding. *Journal of Optimization Theory and Applications*, 169(3):1042–1068, 2016.

| Malathion reporter                      | Locus tag  | Molecular function                                                                                                                                                | Act./Rep. | $y_{min}$ | $y_{max}$ | $K_M$ | $n$  |
|-----------------------------------------|------------|-------------------------------------------------------------------------------------------------------------------------------------------------------------------|-----------|-----------|-----------|-------|------|
| atpB                                    | PFLU_6124  | <ul style="list-style-type: none"> <li>proton-transporting ATP synthase activity, rotational mechanism</li> </ul>                                                 | Activated | 1467      | 1783      | 0.6   | 4.5  |
| petA                                    | PFLU_0841  | <ul style="list-style-type: none"> <li>2 iron, 2 sulfur cluster binding,</li> <li>metal ion binding</li> <li>ubiquinol-cytochrome-c reductase activity</li> </ul> | Activated | 853       | 1125      | 1.4   | 2.4  |
| sucC                                    | PFLU_1823  | <ul style="list-style-type: none"> <li>ATP binding</li> <li>magnesium ion binding</li> <li>succinate-CoA ligase activity</li> </ul>                               | Activated | 257       | 337       | 0.4   | 21.6 |
| rpoA                                    | PFLU_5502  | <ul style="list-style-type: none"> <li>DNA binding</li> <li>protein dimerization activity</li> <li>DNA-directed 5'-3' RNA polymerase activity</li> </ul>          | Activated | 1256      | 1542      | 0.9   | 3.0  |
| fabA                                    | PFLU_1836  | <ul style="list-style-type: none"> <li>dehydratase activity</li> <li>isomerase activity</li> </ul>                                                                | Activated | 292       | 373       | 0.2   | 1.1  |
| anti-sigma 28 factor                    | PFLU_4736  | <ul style="list-style-type: none"> <li>Negative regulator of flagellin synthesis</li> </ul>                                                                       | Activated | 339       | 535       | 0.7   | 1.5  |
| Uncharacterized protein I               | PFLU_3761  |                                                                                                                                                                   | Activated | 2465      | 3110      | 0.5   | 2.7  |
| cspA2                                   | PFLU_4150  | <ul style="list-style-type: none"> <li>major cold shock protein</li> </ul>                                                                                        | Activated | 706       | 1186      | 1.5   | 5.3  |
| Putative ABC transport protein          | PFLU_0376  | <ul style="list-style-type: none"> <li>ligand-gated ion channel activity</li> </ul>                                                                               | Activated | 584       | 1083      | 1.0   | 2.0  |
| gltA                                    | PFLU_1815  | <ul style="list-style-type: none"> <li>citrate (Si)-synthase activity</li> </ul>                                                                                  | Activated | 238       | 458       | 0.9   | 1.9  |
| lpxC                                    | PFLU_0953  | <ul style="list-style-type: none"> <li>metal ion binding</li> <li>deacetylase activity</li> </ul>                                                                 | Activated | 1017      | 2418      | 0.4   | 8.7  |
| Uncharacterized protein II              | PFLU_1358  |                                                                                                                                                                   | Repressed | 1073      | 3387      | 0.3   | 1.9  |
| capB                                    | PFLU_1302A | <ul style="list-style-type: none"> <li>cold shock protein</li> </ul>                                                                                              | Repressed | 9616      | 10543     | 1.0   | 8.6  |
| Putative outer membrane porin A protein | PFLU_4612  | <ul style="list-style-type: none"> <li>porin activity</li> </ul>                                                                                                  | Activated | 642       | 1172      | 0.6   | 1.5  |
| acrA                                    | PFLU_1380  | <ul style="list-style-type: none"> <li>transmembrane transporter activity</li> </ul>                                                                              | Activated | 354       | 682       | 0.9   | 2.9  |

Table 1: Encoder library metadata and transfer curve parameters for the fitted Hill equations in Fig. 4d.

# Learning transcriptome dynamics for discovery of optimal genetic reporters of novel compounds

Aqib Hasnain et al.

## 1 Supplementary Text

### 1.1 Observability maximization for transcriptome dynamics

Here we derive the solution to the observability maximization problem briefly outlined in the Methods section. Recall that we have a state-space representation of the transcriptome dynamics as

$$\begin{aligned}\mathbf{x}_{t+1} &= \mathbf{K}\mathbf{x}_t \\ \mathbf{y} &= \mathbf{W}\mathbf{x}_t\end{aligned}\quad (1)$$

where  $\mathbf{x} \in \mathbb{R}^n$  is the (hidden) cell state,  $\mathbf{K}$  is the state transition matrix,  $\mathbf{W}$  are the unknown gene sampling weights, and  $\mathbf{y} \in \mathbb{R}^p$  are the  $p$  measurements. The objective,  $\mathcal{J}$ , is formulated by the signal energy (or output energy) of the system

$$\mathcal{J} = \sum_{i=1}^m \mathbf{y}_i^\top \mathbf{y}_i = \sum_{i=0}^m \mathbf{x}_0^\top \mathbf{K}^{i\top} \mathbf{W}^\top \mathbf{W} \mathbf{K}^i \mathbf{x}_0, \quad (2)$$

and we seek the gene sampling weights  $\mathbf{W}$  which maximize the objective

$$\begin{aligned}\max_{\mathbf{W} \in \mathbb{R}^{p \times n}} \quad & \mathcal{J} \\ \text{subject to} \quad & \mathbf{W}\mathbf{W}^\top = I_{p \times p}.\end{aligned}\quad (3)$$

The constraint enforces that the rows of  $\mathbf{W}$  are orthogonal to each other and that the length of each row be equal to 1. This further avoids the issue of the objective blowing up to infinity. The solution to the above optimization problem is obtained by forming the Lagrangian dual problem and finding the maxima of the the dual objective in terms of the dual variable (a  $p \times p$  matrix),  $\mathbf{D}$ , i.e.

$$\begin{aligned}\max_{\mathbf{W} \in \mathbb{R}^{p \times n}} \quad & \mathcal{J} + \mathcal{L} \\ \text{where } \mathcal{L} = \quad & -\text{tr}\left((\mathbf{W}\mathbf{W}^\top - I_{p \times p})\mathbf{D}\right)\end{aligned}\quad (4)$$

and  $\text{tr}()$  denotes the trace operator. Differentiating the dual objective with respect to  $\mathbf{W}^\top$  and equating to 0, we have

$$\begin{aligned}\frac{\partial(\mathcal{J} + \mathcal{L})}{\partial \mathbf{W}^\top} &= \frac{\partial}{\partial \mathbf{W}^\top} \left( \sum_{i=0}^m \mathbf{x}_0^\top \mathbf{K}^{i\top} \mathbf{W}^\top \mathbf{W} \mathbf{K}^i \mathbf{x}_0 - \text{tr}\left((\mathbf{W}\mathbf{W}^\top - I_{p \times p})\mathbf{D}\right) \right) \\ &= \frac{\partial}{\partial \mathbf{W}^\top} \left( \sum_{i=0}^m \text{tr}(\mathbf{x}_0^\top \mathbf{K}^{i\top} \mathbf{W}^\top \mathbf{W} \mathbf{K}^i \mathbf{x}_0) - \text{tr}\left((\mathbf{W}\mathbf{W}^\top - I_{p \times p})\mathbf{D}\right) \right) \\ &= \frac{\partial}{\partial \mathbf{W}^\top} \left( \sum_{i=0}^m \text{tr}(\mathbf{W} \mathbf{K}^i \mathbf{x}_0 \mathbf{x}_0^\top \mathbf{K}^{i\top} \mathbf{W}^\top) - \text{tr}\left((\mathbf{W}\mathbf{W}^\top - I_{p \times p})\mathbf{D}\right) \right) \\ &= \frac{\partial}{\partial \mathbf{W}^\top} \left( \sum_{i=0}^m \text{tr}(\mathbf{W} \mathbf{G}^{(i)} \mathbf{W}^\top) - \text{tr}\left((\mathbf{W}\mathbf{W}^\top - I_{p \times p})\mathbf{D}\right) \right) \\ &= \frac{\partial}{\partial \mathbf{W}^\top} \left( \text{tr}\left(\mathbf{W} \sum_{i=0}^m \mathbf{G}^{(i)} \mathbf{W}^\top\right) - \text{tr}\left((\mathbf{W}\mathbf{W}^\top - I_{p \times p})\mathbf{D}\right) \right) \\ &= \frac{\partial}{\partial \mathbf{W}^\top} \left( \text{tr}(\mathbf{W} \mathbf{G} \mathbf{W}^\top) - \text{tr}\left((\mathbf{W}\mathbf{W}^\top - I_{p \times p})\mathbf{D}\right) \right) \\ &= 2\mathbf{G}\mathbf{W}^\top - 2\mathbf{W}^\top \mathbf{D} = 0\end{aligned}\quad (5)$$

where the second equality comes from the fact that  $\mathcal{J}$  is a sum of  $m$  scalars and so applying the trace operator has no effect on the sum, the third equality uses the cyclic property of the trace of products, and the fifth equality uses the fact that  $\text{tr}(\mathbf{A}) + \text{tr}(\mathbf{B}) = \text{tr}(\mathbf{A} + \mathbf{B})$ . Finally, the Gram matrix,  $\mathbf{G}$ , is defined to be  $\mathbf{G} = \sum_i \mathbf{G}^{(i)} = \sum_i \mathbf{K}^i \mathbf{x}_0 \mathbf{x}_0^\top \mathbf{K}^{i^\top}$ , a sum of quadratic forms, which is itself a quadratic form and therefore a symmetric matrix with non-negative, real-valued eigenvalues. From the final equality in Eq. (5) we have

$$\mathbf{G}\mathbf{W}^\top = \mathbf{W}^\top \mathbf{D} \quad (6)$$

which says columns of the eigenvectors of  $\mathbf{G}$  are the rows of gene sampling weights  $\mathbf{W}$ . Moreover, the eigenvector of  $\mathbf{G}$  corresponding to the eigenvalue with largest magnitude in  $\mathbf{D}$  is the maximizer when  $p = 1$ .

## 1.2 Fold change dynamics of two linear systems

We have reasoned in the main text that the gene expression dynamics of each experimental condition are well approximated by a linear state-space representation. We then define the dynamics as

$$\begin{aligned} \frac{dx_{\text{on}}}{dt} &= ax_{\text{on}} + bu \\ \frac{dx_{\text{off}}}{dt} &= ax_{\text{off}} \end{aligned} \quad (7)$$

where here  $x_{\text{on}}$  and  $x_{\text{off}}$  are scalar variables for ease of analysis. The variables represent the dynamics in the case where the input is present (*on*) and when the input is absent (*off*), respectively. The input  $u$  represents the scalar input of a small molecule, e.g. malathion, that drives the expression of genes in the *on* condition through a step input, i.e.  $u(t) = 1$  for all  $t > 0$ . The solution of the linear ordinary differential equations above are given by

$$\begin{aligned} x_{\text{on}}(t) &= e^{at}x_0 + \int_0^t e^{a(t-\tau)}bu(\tau)d\tau \\ x_{\text{off}}(t) &= e^{at}x_0 \end{aligned} \quad (8)$$

where  $x(0) = x_0$  for both  $x_{\text{on}}$  and  $x_{\text{off}}$ . We want to show that the fold change response is given by the solution of a linear dynamical system. Taking the fold change of  $x_{\text{on}}$  to  $x_{\text{off}}$  we have

$$\begin{aligned} x_{\text{fc}}(t) &= \frac{x_{\text{on}}(t)}{x_{\text{off}}(t)} = 1 + \int_0^t e^{-a\tau} \frac{b}{x_0} d\tau \\ &= 1 + \frac{b}{ax_0} - \frac{b}{ax_0} e^{at} \\ &= 1 + \alpha - \alpha e^{at}. \end{aligned} \quad (9)$$

To show that there exists a linear ordinary differential equation (ODE) that gives rise to the above solution  $x_{\text{fc}}(t)$ , we apply the steps to solve linear ODEs using integrating factors but in reverse order. We know in advance that the integrating factor should take the form  $e^{at}$  and we start by dividing both sides of (9) by this integrating factor

$$e^{-at}x_{\text{fc}} = e^{-at}(1 + \alpha) - \alpha. \quad (10)$$

We next differentiate both sides and integrate both sides with respect to  $t$

$$\int \frac{d}{dt} (e^{-at}x_{\text{fc}}) dt = \int ae^{-at} dt - \int \alpha ae^{-at} dt, \quad (11)$$

then once again differentiating both sides gives

$$\frac{d}{dt} (e^{-at}x_{\text{fc}}) = ae^{-at} - \alpha ae^{-at}. \quad (12)$$

Applying the product rule to the left hand side, we have

$$\begin{aligned} e^{-at} \frac{dx_{\text{fc}}}{dt} - ae^{-at}x_{\text{fc}} &= ae^{-at} - \alpha ae^{-at} \\ &= e^{-at}(a - \alpha a). \end{aligned} \quad (13)$$

Finally, multiplying through by the integrating factor,  $e^{at}$ , and solving for  $\frac{dx_{fc}}{dt}$ , we obtain

$$\frac{dx_{fc}}{dt} = ax_{fc} + a - \alpha a \quad (14)$$

which is a linear first order ODE, i.e. a linear dynamical system with a step input and  $\alpha = \frac{b}{ax_0}$ . The importance of this result is to be able to say that if the dynamics of the transcriptome in each experimental condition are well represented by a linear system, then the fold change dynamics, under the stated assumptions, can also be well represented by a linear system.

We briefly remark on the extension to the multivariate case. Under the assumption that the system dynamics,  $A$ , is diagonalizable, the above analysis holds. One such transformation which diagonalizes the the dynamics is given by the set of eigenvectors of  $A$ . Formally, if we now have system dynamics with state,  $\mathbf{x} \in \mathbb{R}^n$ , such that

$$\begin{aligned} \frac{d\mathbf{x}_{on}}{dt} &= A\mathbf{x}_{on} + Bu \\ \frac{d\mathbf{x}_{off}}{dt} &= A\mathbf{x}_{off}, \end{aligned} \quad (15)$$

applying the transformation  $\tilde{\mathbf{x}} = T^{-1}\mathbf{x}$ , where  $T \in \mathbb{R}^{n \times n}$  is the matrix of eigenvectors of  $A$ , results in the transformed systems

$$\begin{aligned} \frac{d\tilde{\mathbf{x}}_{on}}{dt} &= D\tilde{\mathbf{x}}_{on} + \tilde{B}u \\ \frac{d\tilde{\mathbf{x}}_{off}}{dt} &= D\tilde{\mathbf{x}}_{off}, \end{aligned} \quad (16)$$

where  $\tilde{B} = T^{-1}B$ . To solve for the fold change dynamics in the multivariate case, we cast the state coordinates into a diagonal matrix, i.e.  $\text{diag}(\tilde{\mathbf{x}})$ , and compute  $\text{diag}(\tilde{\mathbf{x}}_{on})(\text{diag}(\tilde{\mathbf{x}}_{off}))^{-1}$ . Since the solution in each coordinate is uncoupled from other coordinates, we then have  $n$  solutions, each as in Eq. (9).

The case where the above derivation does not hold when the eigenvalues of  $A$  have zero real part, i.e. they are exactly zero or have purely sinusoidal response (corresponding to periodic orbits). In this case, the fold change in the coordinate corresponding to zero eigenvalues will approach infinity or it will not be possible to represent the fold change dynamics as a sum of weighted exponentials, e.g.  $\tan(x)$ . However, such a case would be improbable in a data-driven application for gene regulatory networks. Moreover, any eigenvalue with magnitude zero does not contribute to the dynamics of the system and should be removed from the model.

## 2 Supplementary Figures

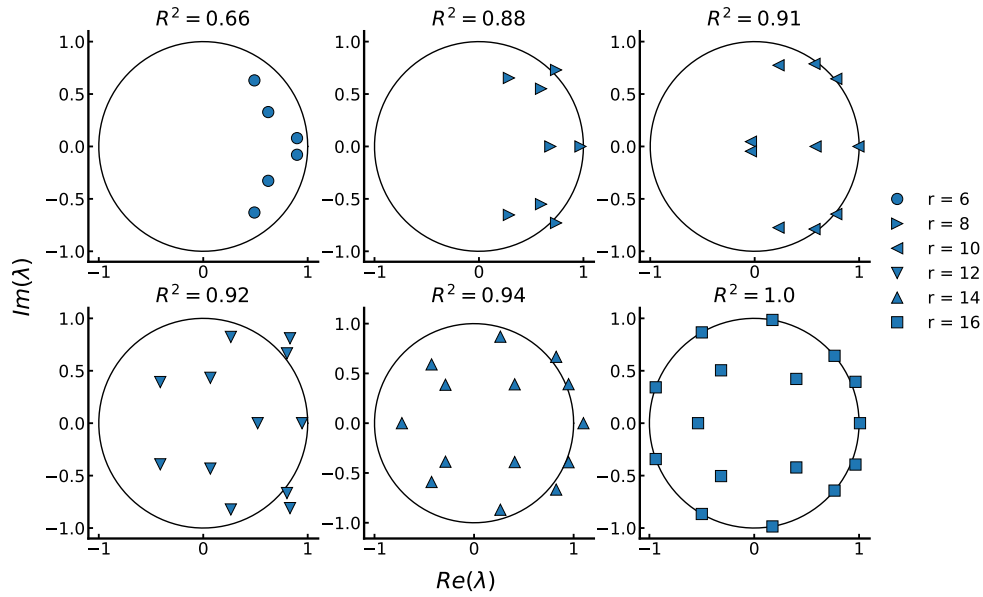

Figure 1: The eigenvalues of the DMD operator plotted in the complex plane for varying number of modes.

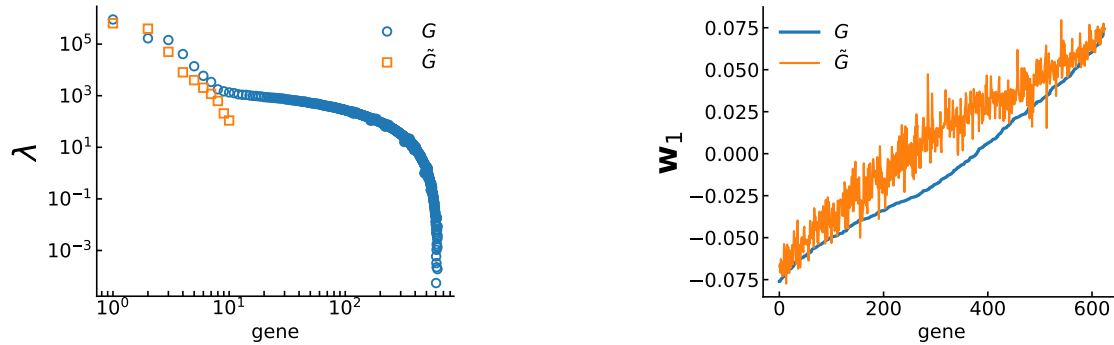

Figure 2: (Left) Approximation of the eigenvalues of the Gram matrix by the reduced order model given by DMD. The full Gram matrix eigenvalues are given in blue circles and the reduced Gram matrix eigenvalues are given in orange squares. (Right) Approximation of the leading eigenvector of the Gram matrix by the reduced order model given by DMD. This eigenvector corresponds to the gene sampling weights in the main text.



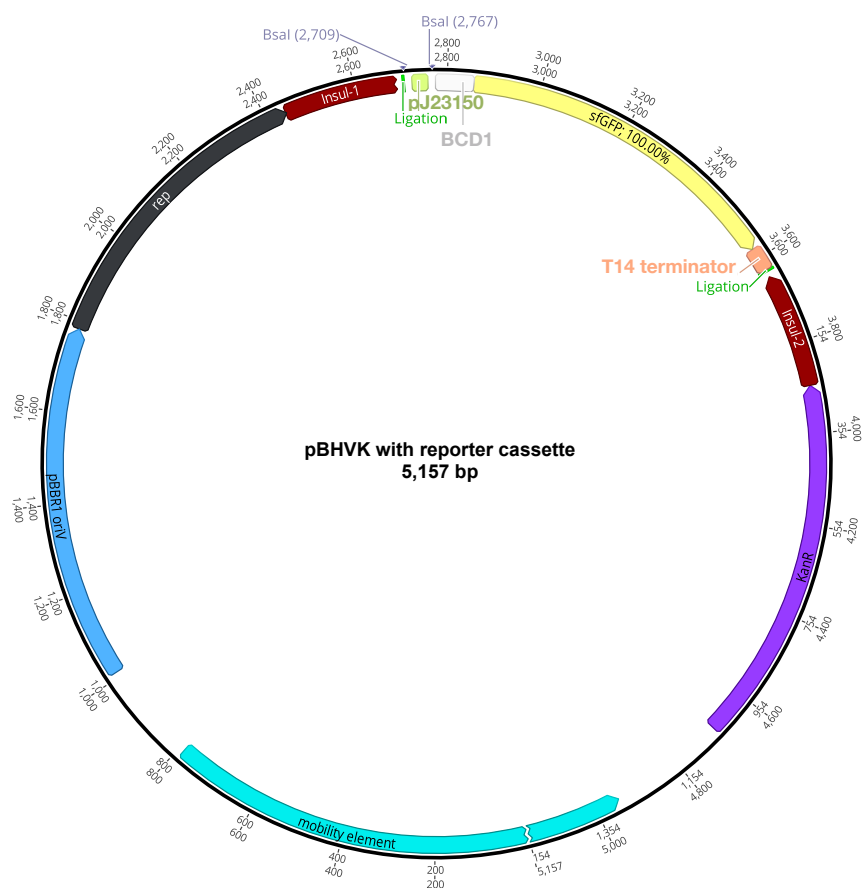

Figure 3: The full plasmid map of pBHVK with the reporter cassette. The two BsaI cut sites on either side of the promoter, pJ23150, are used in Golden Gate Assembly to replace the promoter sequence with a promoter used for malathion sensing. A bicistronic design is used for the ribosome binding site, BCD1. A terminator from the set of Voigt lab terminators is used, T14. For fluorescent reporting, super folder GFP (sfGFP) is used. See Table 3 for sequences of the terminator, ribosome binding site, and sfGFP. See 2 for sequences of the promoters used in the sensor library.

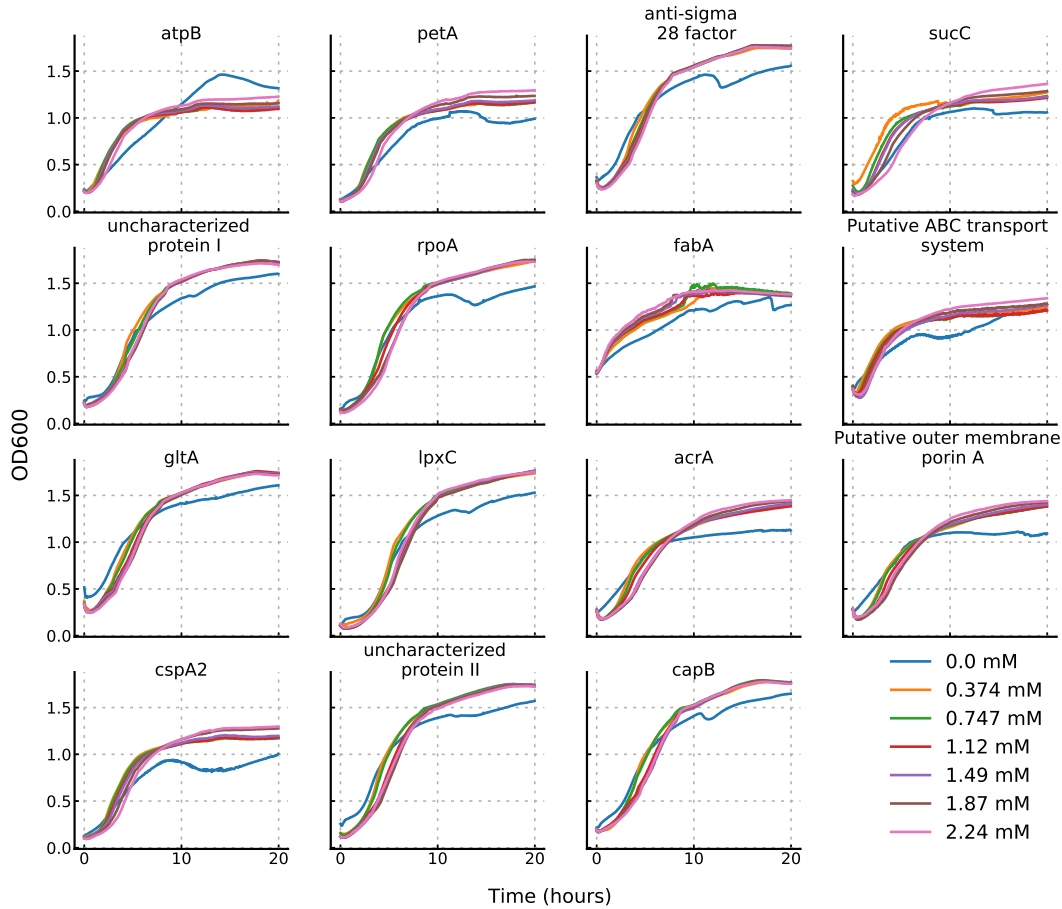

Figure 4: Growth curves of each malathion reporter subject to malathion induction by means of Spectracide.

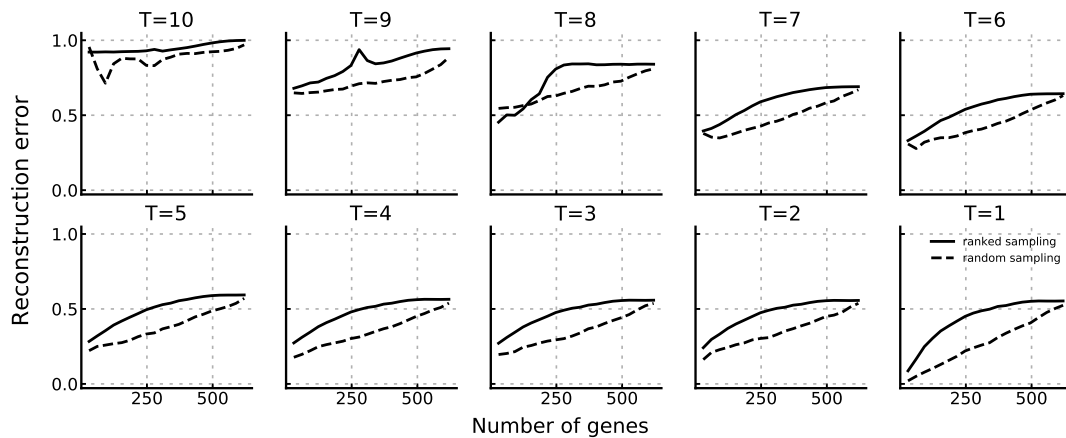

Figure 5: Comparison of the reconstruction accuracy if genes were sampled according to observability ranked sampling (solid line) vs. random sampling (dashed line).

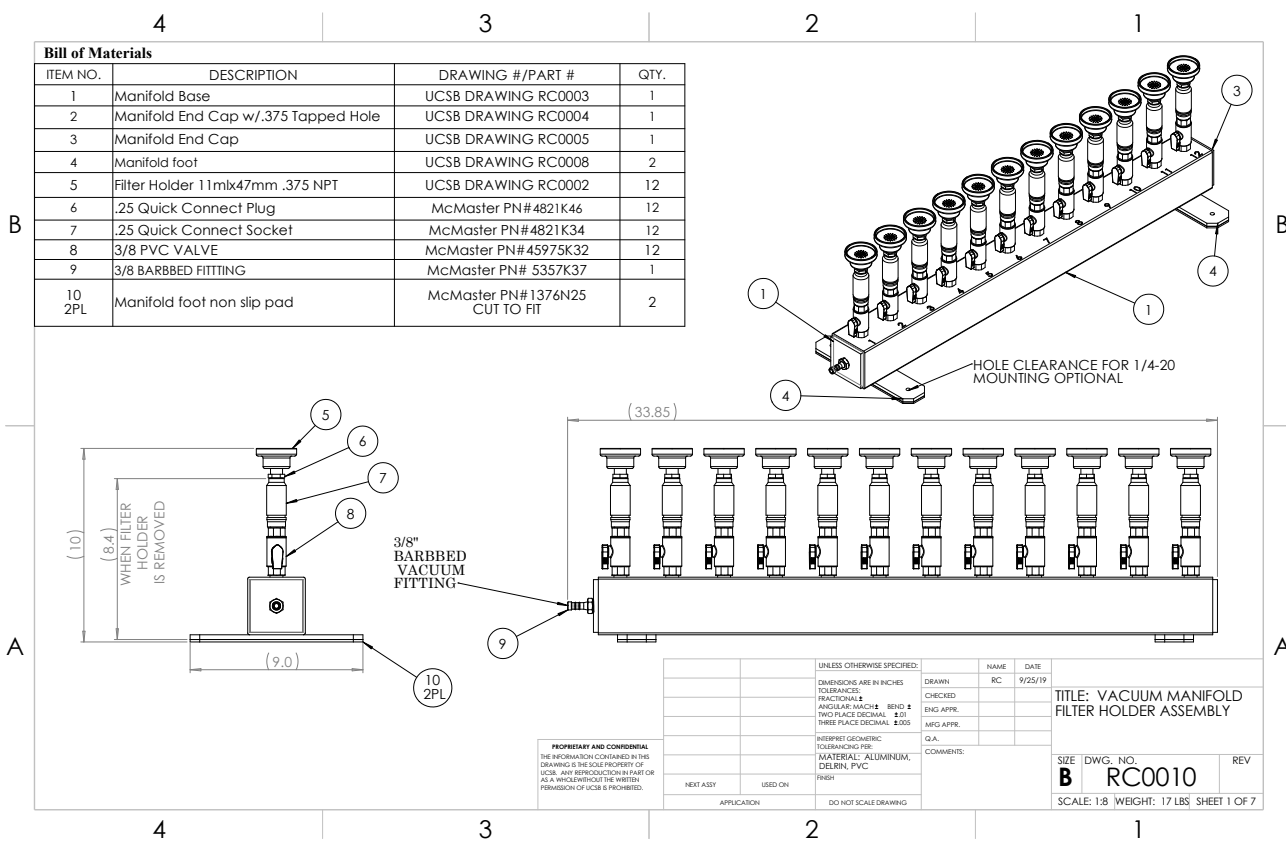

Figure 6: Vacuum manifold design for rapid sampling of mRNA dynamics.

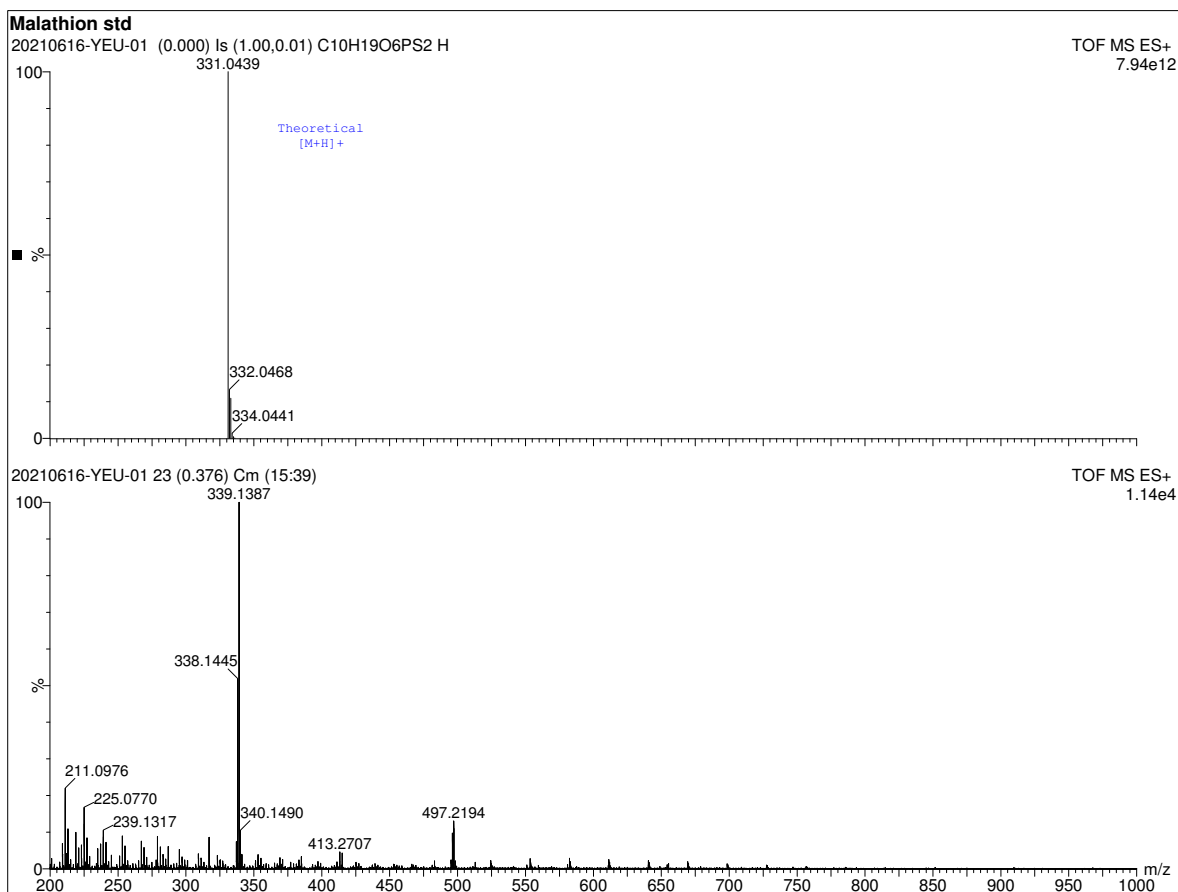

Figure 7: Mass spectrum of malathion (Millipore Sigma Catalog no. 36143) given by time-of-flight mass spectrometry. The theoretical mass spectrum is shown in the upper spectrum and the measured mass spectrum is shown in the lower spectrum.

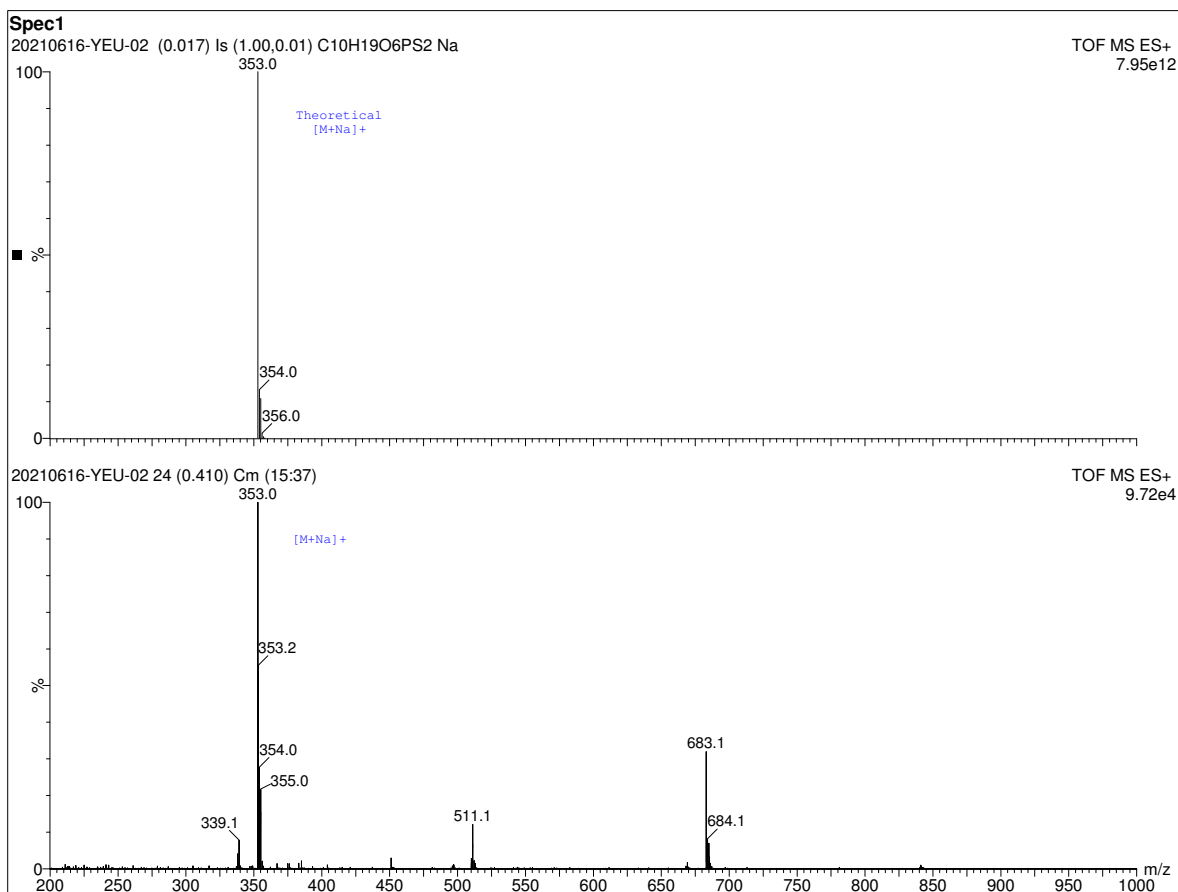

Figure 8: Mass spectrum of Spectracide (replicate 1) (Spectracide Catalog no. 071121309006) given by time-of-flight mass spectrometry. The theoretical mass spectrum of malathion is shown in the upper spectrum and the measured mass spectrum of Spectracide is shown in the lower spectrum.

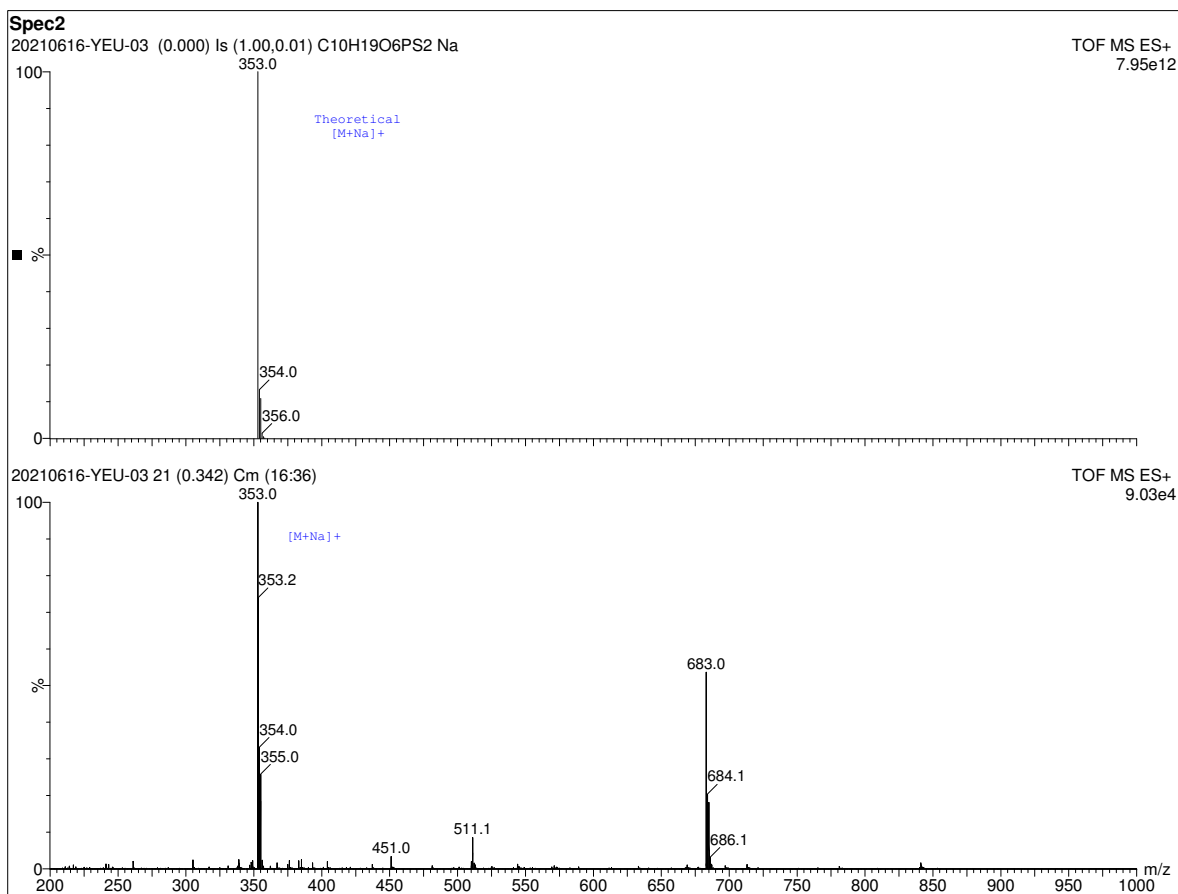

Figure 9: Mass spectrum of Spectracide (replicate 2) (Spectracide Catalog no. 071121309006) given by time-of-flight mass spectrometry. The theoretical mass spectrum of malathion is shown in the upper spectrum and the measured mass spectrum of Spectracide is shown in the lower spectrum.

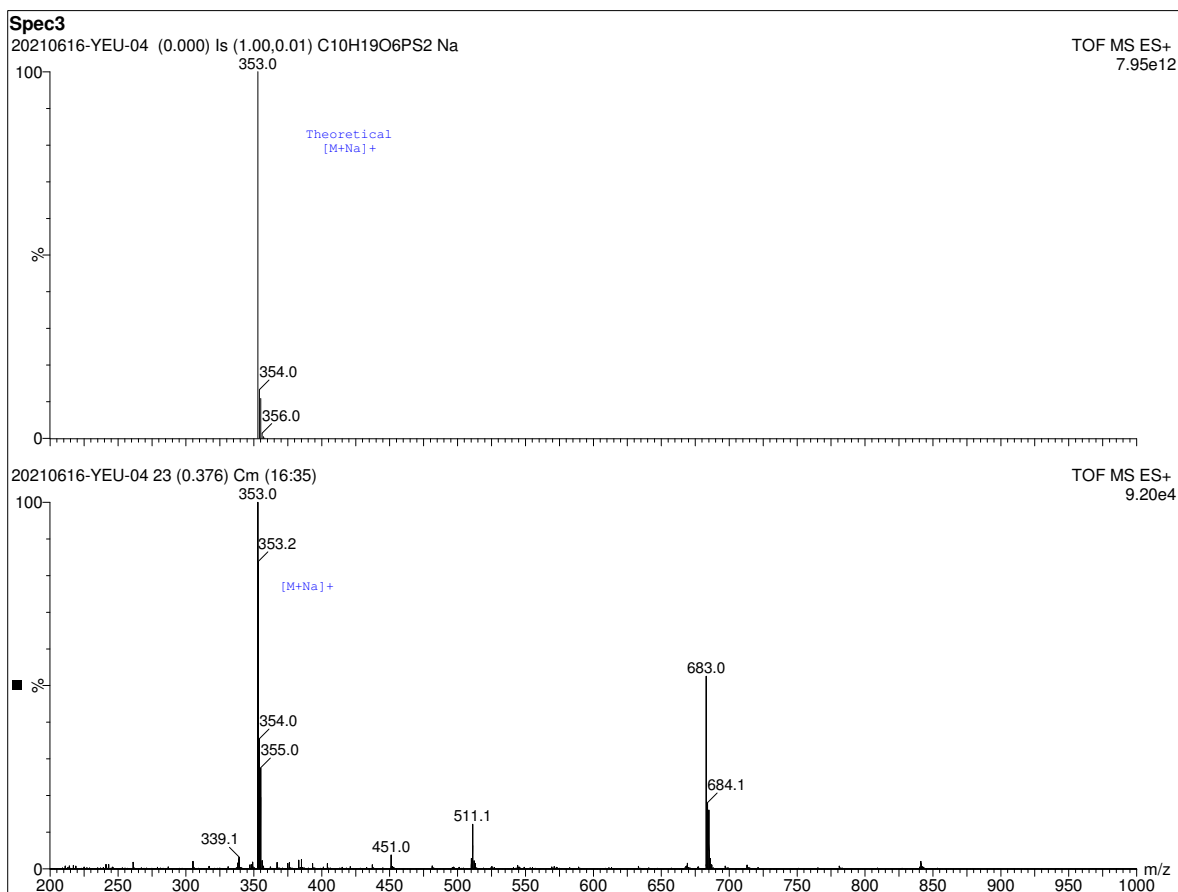

Figure 10: Mass spectrum of Spectracide (replicate 3) (Spectracide Catalog no. 071121309006) given by time-of-flight mass spectrometry. The theoretical mass spectrum of malathion is shown in the upper spectrum and the measured mass spectrum of Spectracide is shown in the lower spectrum.

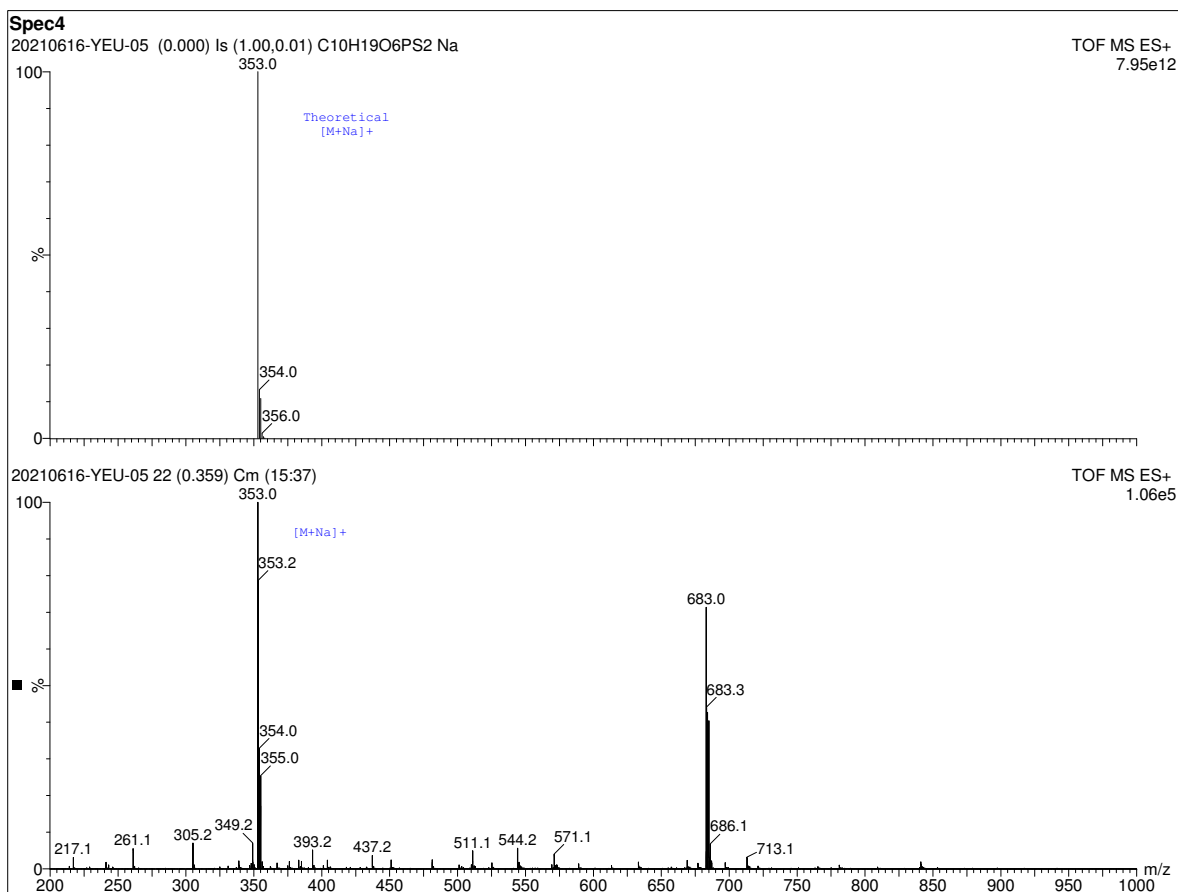

Figure 11: Mass spectrum of Spectracide (replicate 4) (Spectracide Catalog no. 071121309006) given by time-of-flight mass spectrometry. The theoretical mass spectrum of malathion is shown in the upper spectrum and the measured mass spectrum of Spectracide is shown in the lower spectrum.



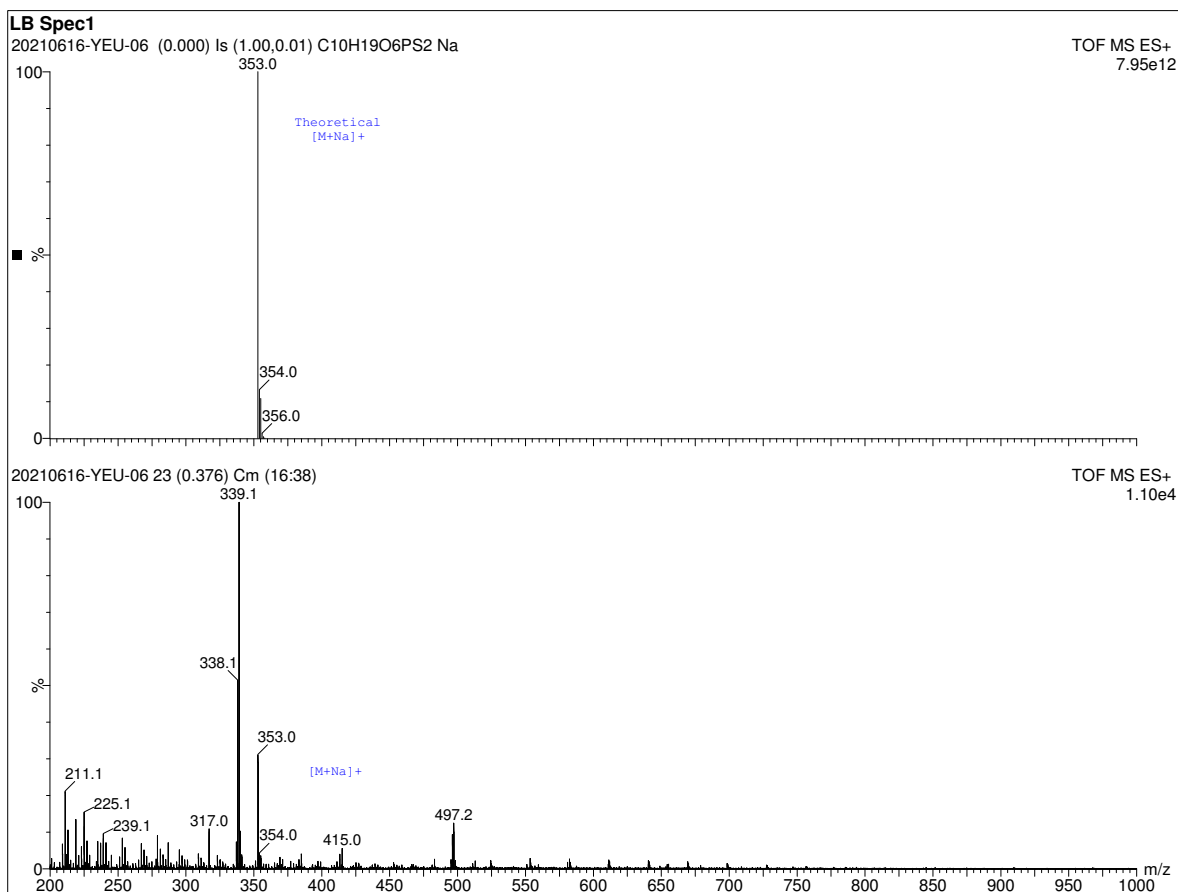

Figure 12: Mass spectrum of a 5% Spectracide in LB broth (replicate 1) given by time-of-flight mass spectrometry. The theoretical mass spectrum of malathion is shown in the upper spectrum and the measured mass spectrum of the solution is shown in the lower spectrum.

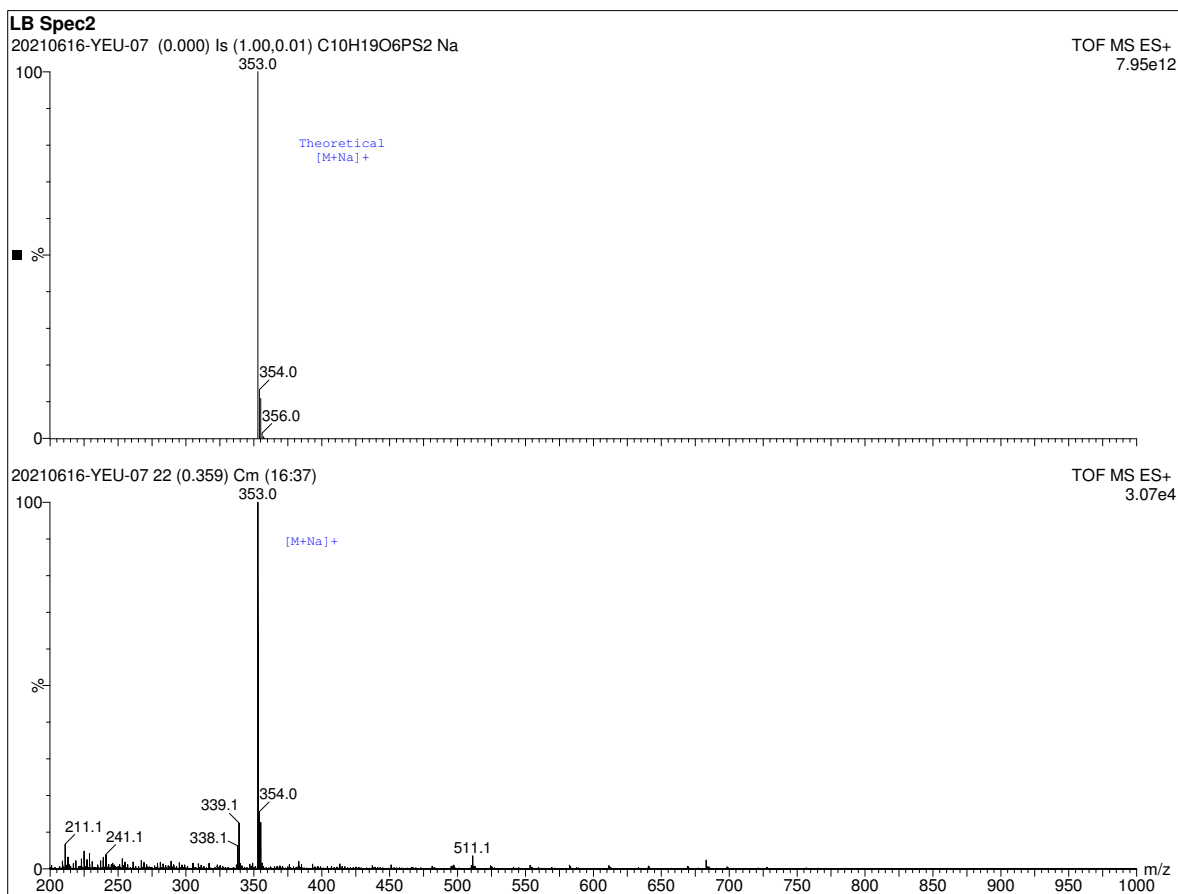

Figure 13: Mass spectrum of a 5% Spectracide in LB broth (replicate 2) given by time-of-flight mass spectrometry. The theoretical mass spectrum of malathion is shown in the upper spectrum and the measured mass spectrum of the solution is shown in the lower spectrum.

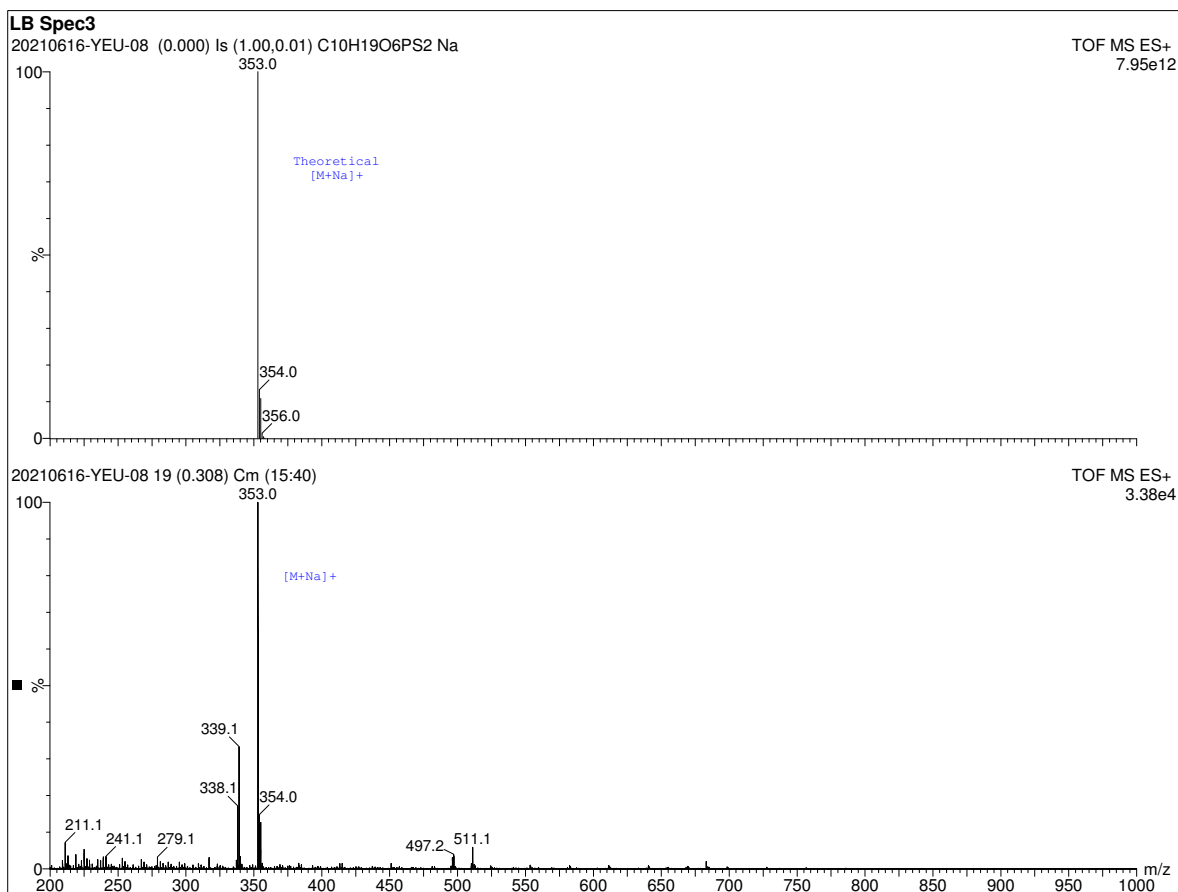

Figure 14: Mass spectrum of a 5% Spectracide in LB broth (replicate 3) given by time-of-flight mass spectrometry. The theoretical mass spectrum of malathion is shown in the upper spectrum and the measured mass spectrum of the solution is shown in the lower spectrum.

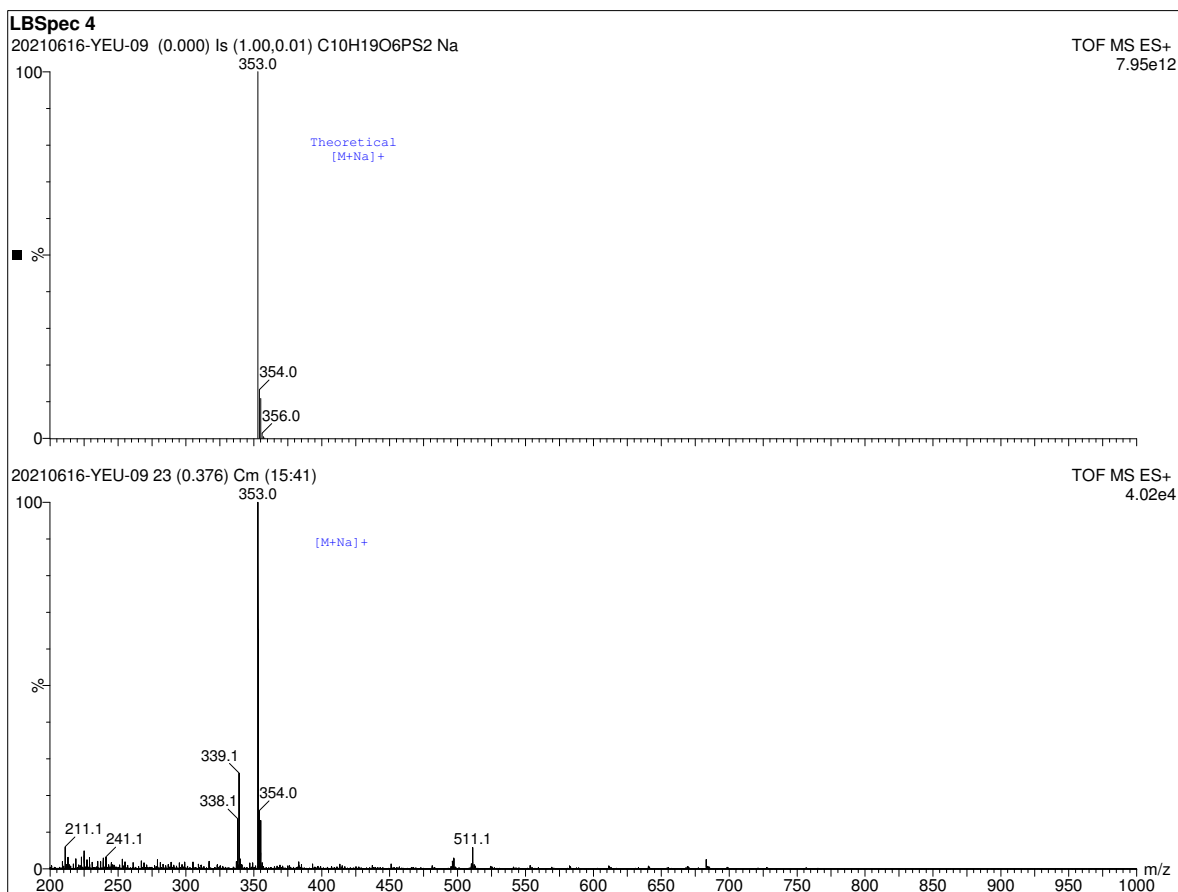

Figure 15: Mass spectrum of a 5% Spectracide in LB broth (replicate 4) given by time-of-flight mass spectrometry. The theoretical mass spectrum of malathion is shown in the upper spectrum and the measured mass spectrum of the solution is shown in the lower spectrum.

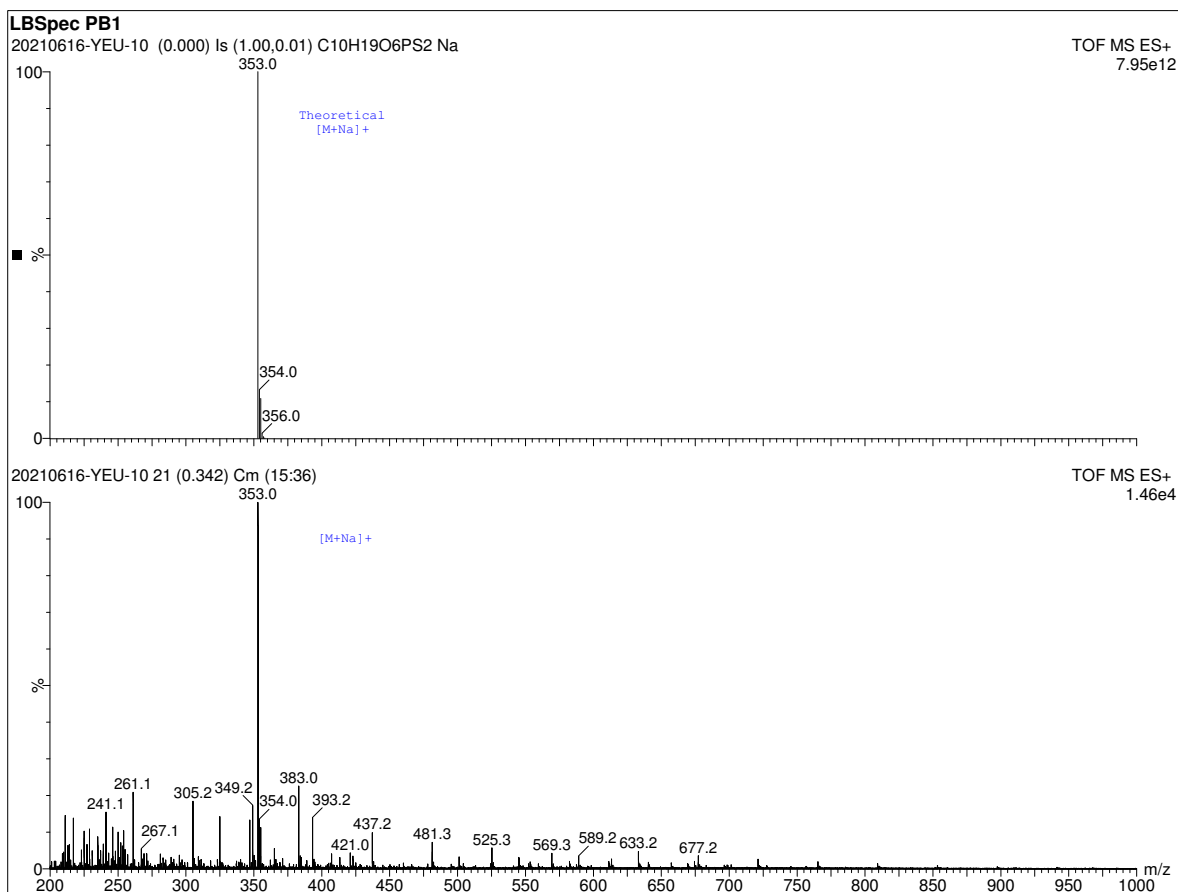

Figure 16: Mass spectrum of a 5% Spectracide in LB broth after photobleaching (replicate 1) given by time-of-flight mass spectrometry. The theoretical mass spectrum of malathion is shown in the upper spectrum and the measured mass spectrum of the photobleached solution is shown in the lower spectrum.

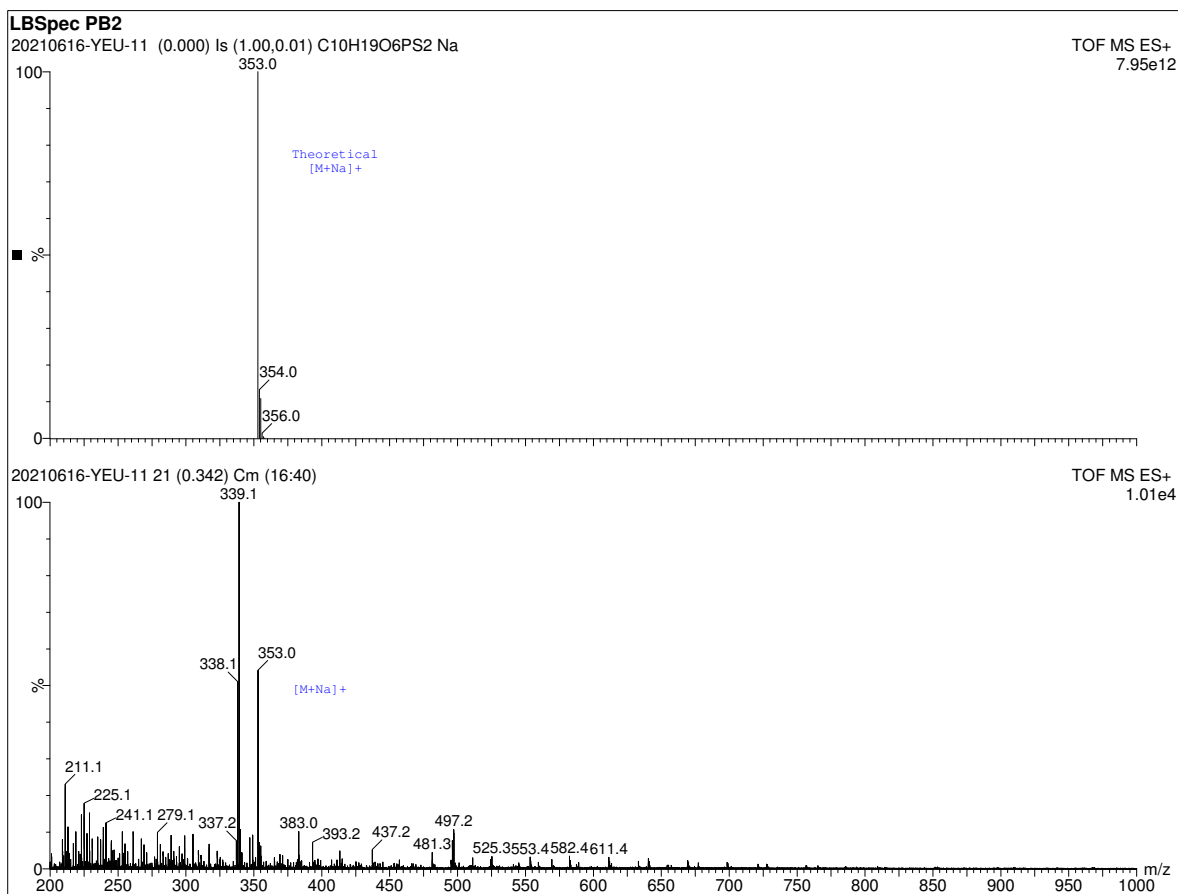

Figure 17: Mass spectrum of a 5% Spectracide in LB broth after photobleaching (replicate 2) given by time-of-flight mass spectrometry. The theoretical mass spectrum of malathion is shown in the upper spectrum and the measured mass spectrum of the photobleached solution is shown in the lower spectrum.

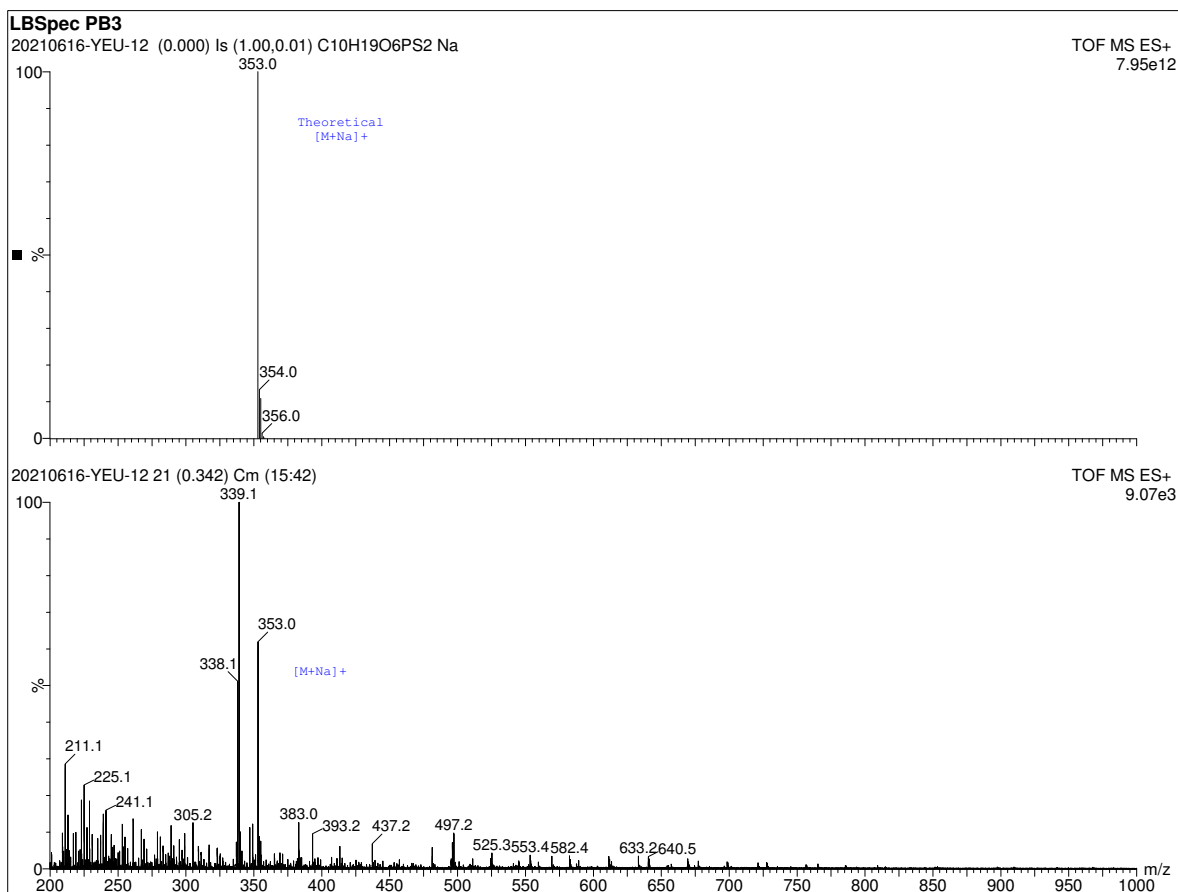

Figure 18: Mass spectrum of a 5% Spectracide in LB broth after photobleaching (replicate 3) given by time-of-flight mass spectrometry. The theoretical mass spectrum of malathion is shown in the upper spectrum and the measured mass spectrum of the photobleached solution is shown in the lower spectrum.

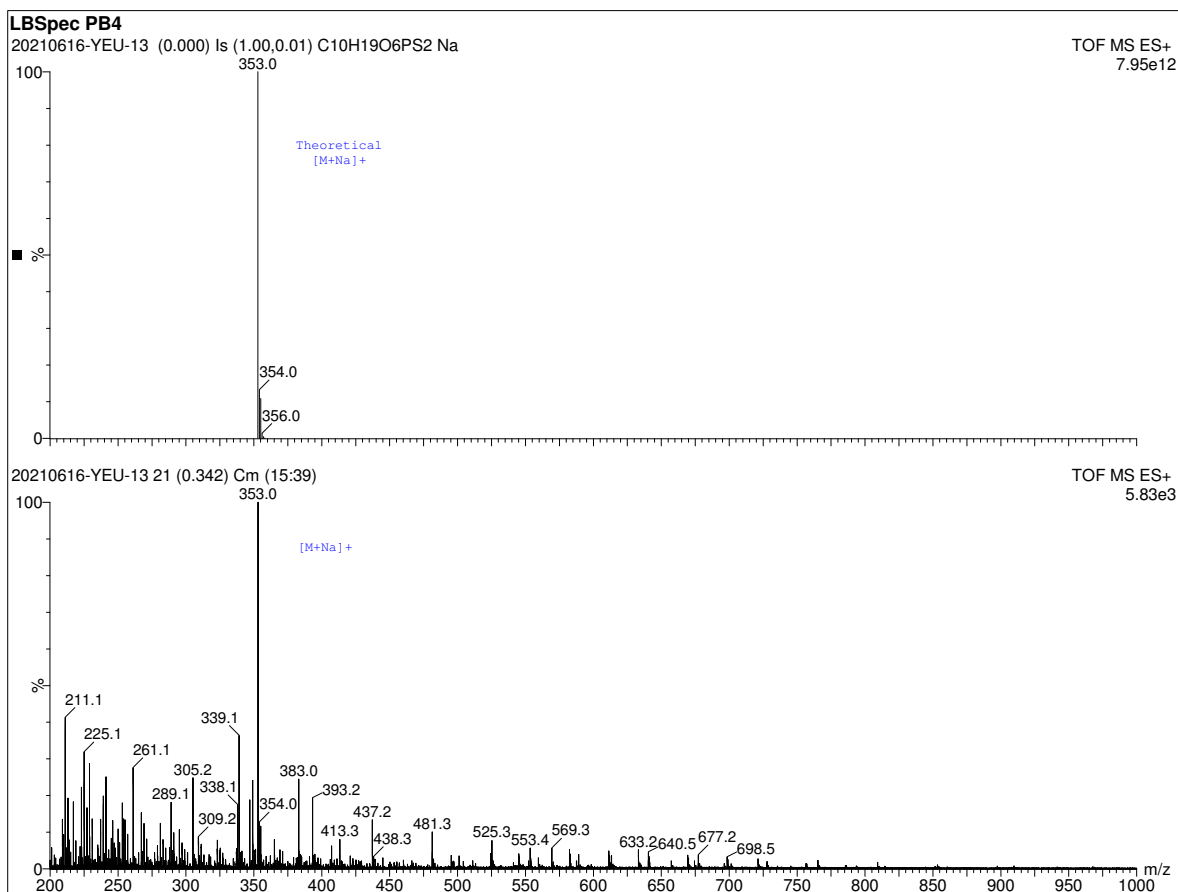

Figure 19: Mass spectrum of a 5% Spectracide in LB broth after photobleaching (replicate 4) given by time-of-flight mass spectrometry. The theoretical mass spectrum of malathion is shown in the upper spectrum and the measured mass spectrum of the photobleached solution is shown in the lower spectrum.



### 3 Supplementary Tables

55

| Time point (minutes) | OD <sub>600</sub> | Volume harvested (mL) | Malathion induction |
|----------------------|-------------------|-----------------------|---------------------|
| 0                    | 0.5               | 10                    |                     |
| 10                   | –                 | 10                    | X                   |
| 20                   | –                 | 10                    |                     |
| 30                   | –                 | 10                    |                     |
| 40                   | –                 | 10                    |                     |
| 50                   | –                 | 10                    |                     |
| 60                   | 1.0               | 10                    |                     |
| 70                   | –                 | 10                    |                     |
| 80                   | –                 | 10                    |                     |
| 90                   | –                 | 10                    |                     |

Table 1: Metadata for the time-series RNAseq experiment.

| Sensor    | Strand    | Loci              | Promoter sequence                                                                                                                                                                                                                                                                                                                                                                                                                                   |
|-----------|-----------|-------------------|-----------------------------------------------------------------------------------------------------------------------------------------------------------------------------------------------------------------------------------------------------------------------------------------------------------------------------------------------------------------------------------------------------------------------------------------------------|
| PFLU_6124 | Antisense | 6709164 - 6709017 | AACATTTGCTTATGTAGCGCGTGATCGGAAATCACTAC<br>CCGGCAGTTGAATAGGGGCAGAACC GCCCTATACTCT<br>GCGCGCATTTTGTCCGCACAAATTATGCCAAGTTATTG<br>ATTTCCGGCAGCCGACCATTGAGGAGCAAGAGTG                                                                                                                                                                                                                                                                                    |
| PFLU_0841 | Sense     | 950865 - 951131   | TTCGCTTTACGTTCCACAAAAACGCCAGCCTCCTCAC<br>GGAGCTGGGCGTTTTTTATTGCCTGCGATTATACACA<br>AATTTCCGCGTGACAACCTGCCACATCCGTAGACCCCC<br>TATACTACAAGGCTGGAGGCTGAGCCCAGGGCAATTC<br>CCTTGTACATACGTGGGGCTTTTCATTACCATTTCGGCAA<br>AATTTTATAAAGTAAAGATTCAACACTTAGTAGACGCC<br>TGATTTAACAGGCCAAAAAAGCTGATGGGAGAGGACT<br>GA                                                                                                                                              |
| PFLU_4736 | Sense     | 5213048 - 5213188 | AGTGCTGGCAGAGGACGCTGGGTTTTTCTACACTGTGC<br>ACGAGATATCCGTGCGCAGATTTATTGTCATTTCGCGC<br>CTAAAGTTCGTCCGGGTATTGCCGAAAACATGGCAAGC<br>GTCCAAATACCCAGAGGTTTTTTGATC                                                                                                                                                                                                                                                                                           |
| PFLU_1823 | Sense     | 1989934 - 1990137 | GCGAGATAATAAGAAACCACGGCGGAGTTGCCCGTCG<br>TGAGCCTTGCGCGCAAGACTCACCGCGGAATATCCGCT<br>GGACGCAGTCTTGCGCAGCTTTACGGGCCTTGAGCCCC<br>GCAAGCTGCGCAAGCAGCAGTCACAGGTGGCGCGGCA<br>CTCATAATGAGCGCAGCGCCGAATGCGCAGTACCTAAC<br>GAAGACGGTAAAAAGC                                                                                                                                                                                                                    |
| PFLU_3761 | Antisense | 4158693 - 4158135 | CTGTGACACGTCCCAAGGCAGGCGCGGCGGATAGTT<br>TCAGTTCGGCGTCATACAAGTGCCTGCACCCCACTTC<br>ATCGTGGCCGTTTGCGAAAGCGATTGTCCGCTTGCGAC<br>GCGGCACAATCAGGGTATGTGCGCAGCTTGGCTTCCCA<br>GTAATTGCCCATTAATTTGTGGCTTTTCTGACGAGC<br>TTTTACTCGTCATCTCTTTGTTTTTTACTATTATCGT<br>TCACCTGCGCACTCAAGGAAGAGAGGCTGAGCGCCTTG<br>AGGCTGGTAGAAAATTCATACTCGATCACTGAACGAGT<br>TATTGCTTTTACCCAGAACCTAACGACTCAGCCAACCA<br>TAAATACCTCTTGGTGAAACCGATGGATAAAATGTGTG<br>GCATCGTTGTAGTGGTAGGAC |
| PFLU_5502 | Antisense | 6038217-6038089   | GTGTGATCCGCTTGAAGCCCGGCAGCTAGTGCGCTGCC<br>GGGTTGATTATTTGTTATTACAGCGATATTATCTCGCG<br>CCCTATTTCTTGGCTTCCGGGGCGTAGGTAGCTGTCAA<br>TTGGAGTCCCACTGA                                                                                                                                                                                                                                                                                                       |

|            |           |                   |                                                                                                                                                                                                                                                                                                                                                                                                                                                |
|------------|-----------|-------------------|------------------------------------------------------------------------------------------------------------------------------------------------------------------------------------------------------------------------------------------------------------------------------------------------------------------------------------------------------------------------------------------------------------------------------------------------|
| PFLU_1836  | Antisense | 2003829 - 2003581 | CGCCGCGCCATCAGCCAACTCCGACTGGCGTGAAAGAC<br>GAAAGTGCAGTCTTAGGCACCCGAACGGGCCAT<br>AAACAGGCCCGGTTTAAAATTTAGTGAACAAGTGTA<br>CATTAGTACCTTGCCGCTGTGACTTTACTACAACGC<br>AATAGTCTATGTGTAGGCTGCCGACATGAGGCATGAAC<br>GCTTCATTTCGGTTCGGGAAGATTTGCCCTACCCTGCCG<br>CATGGGATTATTGAGGAGCTCGC                                                                                                                                                                    |
| PFLU_0376  | Sense     | 417961 - 418174   | AAGTCATAACTGCTTACACATCAACCGGTTGCCGGTAC<br>TCCTCTGCGTAAGTGTCTGCCCTGAGCTTTGCCGCAC<br>CGATGTGGGGCTTTTCCGACATATGCCGATAACAAATA<br>GCCGTGAAACCTTTGTGACGAGCAACGAGTGGGTTAG<br>GATCGCACCCCGAAATGGTGCAGCCCTTTTGCGCGCCG<br>ACCTTACAAAAATCGTTCAGGGGAC                                                                                                                                                                                                      |
| PFLU_1815  | Antisense | 1980804 - 1980440 | GGCTTTTTTTCACACTGAAGAGCCCCTAACAAATCAGGG<br>CAAAGTTGTTGGGGAGTGCAGCTGGTCAGGTAAGCAC<br>CACCCAGGGAGTGCAGACCCCAATGAAAGCAAGCCCA<br>AAAGCCCTTGCGGTCGGTGGCCGAGTATAGACAGTT<br>AGGTTACTAATGACAACGCGCACTCCTCACCTAATAG<br>CTGATTGCGCTGGCGGGATAAAAGGCGTAAATGGCGC<br>TCAATTTTCGAGGAAAAAGTACGGTTAAAGCCTTCTGGG<br>GCAAGACTTTAGGCAAATTGACATCTGAATTTATCTCA<br>CTATAGTGGTGCAGGCCCCTGCGTGGGGGGTCTGTCTG<br>ATGATTTGAAGCATAAATAGGAGGCCAC                             |
| PFLU_0953  | Sense     | 1058342 - 1058453 | TGGAATGTATCAGGGCTATGAAGGTGATTGGTGTTC<br>GCAAAGGTCTGGTCTGCTATTATCGCCAGCCTTTGTTG<br>ATACCAGTTCGCAATTTGCGCTGAAGCGGTCCAAGCC                                                                                                                                                                                                                                                                                                                        |
| PFLU_1380  | Antisense | 1527252 - 1526967 | GGCAGTAAAACCTCAATCAGGACACTGGGGGCTATCG<br>TTAACGCAACGTTAATAGACGTAAACGATCATCCGAAT<br>ATTTGTGGGACGACACCGTCATGGGTGCCGAACGTAAT<br>GGAATCGAGGCTTCGGGCGTTGCTTTGTCAACACTCCG<br>CGAAGCCTGTCAAGAGTTTACAAACAACCATGAACGTA<br>AGTATATTGCGTAGCAAGCTACTTATCCACTCACAGCT<br>TGTTTTTTACCCTTCCACACTTCTTGTGCGCACCCCTGC<br>GCGCCTGACCCGAGGATCTTC                                                                                                                    |
| PFLU_4612  | Antisense | 5088655 - 5088549 | TGCGTGGCAAATATCTCTTACGTGTAGGCAAGTTCTGT<br>TAGACTTGTGCGCGAGTTGTCCCCCGGTTTGTGGGACT<br>GCTTTACAATCACCAGATGGGGATTTAAACGG                                                                                                                                                                                                                                                                                                                           |
| PFLU_4150  | Sense     | 4592631 - 4592843 | GATTTGCCGCTGATCTCACGGCTTTTTTGGCGGTAAAA<br>CAGGCTTAAACTGCCGCTTCTCACAAATTACGCAGCT<br>TTTACGGCTTTTTTTACCAGTTGATATTTTCGAGCCAAA<br>GCCCCGTAAATCGGGGCTTTCAGCCGATCAGGCACTA<br>AACGCAACGCTATTGATTAGCAAACAATGCCTTGGGGG<br>GGCTCCCAAGCCGAACATTTGACTATGATAGCCCGGT<br>GTGCCAGTTGGCCTGAGCAGCACAGCACTACTGAAAA<br>TATATGTTTCTTGGAGATACACC                                                                                                                     |
| PFLU_1302A | Antisense | 1440968 - 1440759 | GGCGGGTGTCTTGAATAGCGAGGTGGAAAAATACTGT<br>GGGGCATCTTACCGGGGCCGGCGTTGGGGTTCAAAGG<br>TCACAGGGCTTTTCTTGTGATGAATGCGCCGGCGGCTATA<br>AGCCGCAGCCAGCGGGGCCGGGTTAATATTGCCCGC<br>CAGGGCGACCGTGGATAACCACCGTCAGTCACGAATTTA<br>GAGAAACCTTCGGAAATACCATTGGCAGCTTCCGGAAA<br>AAGGGTTAAGGTGGCGCCACTGTGCTGCTTGTGTCACT<br>GAGAATCTCTACACGATATGTTGAATTTTCGATCCAACC<br>ATCTCCAAGAATTTTTCTGCTCTTTGCACTCAGTCTC<br>GGCCAGGGCTTTTCTGAGTCGCAGTTAACTTTGTCCA<br>AGGAGATACACC |

PFLU\_1358 Sense 1498195 - 1498311 | AACAGCCTGCATCCATTGATGCAGGTCAGTTATTGCC  
TTCTTTACGCTCCGTCGTGGGCGACATTGATCCCCGTC  
AATTTTCCAATCCGCCTTCTGCATTAACTTAGCCCTAT  
CGCAACAGGGCAAGTGCAGGAGGCCGGTC

| Part        | Sequence                                                                                                                                                                                                                                                                                                                                                                                                                                                                                                                                                                                                                                                                                                                                                                                 |
|-------------|------------------------------------------------------------------------------------------------------------------------------------------------------------------------------------------------------------------------------------------------------------------------------------------------------------------------------------------------------------------------------------------------------------------------------------------------------------------------------------------------------------------------------------------------------------------------------------------------------------------------------------------------------------------------------------------------------------------------------------------------------------------------------------------|
| BCD1        | GGGCCCAAGTTCACTTAAAAAGGAGATCAACAATGAAAGCAATTTTCGTACTGAAACATCT<br>TAATCATGCACAGGAGACTTTCT                                                                                                                                                                                                                                                                                                                                                                                                                                                                                                                                                                                                                                                                                                 |
| T14         | AACGCATGAGAAAGCCCCCGGAAGATCACCTTCCGGGGGCTTTTTTTATTGCGC                                                                                                                                                                                                                                                                                                                                                                                                                                                                                                                                                                                                                                                                                                                                   |
| sfGFP       | ATGCGTAAAGGGCGAAGAGCTGTTCACTGGTGTGCTCCCTATTCTGGTGGAACCTGGATGGT<br>GATGTCAACGGTCATAAGTTTTCCGTGCGTGGCGAGGGTGAAGGTGACGCAACTAATGGT<br>AACTGACGCTGAAGTTCATCTGTAATACTGGTAACTGCCGGTACCTTGGCCGACTCTGG<br>TAACGACGCTGACTTATGGTGTTCAGTGCTTTGCTCGTTATCCGGACCATATGAAGCAGCA<br>TGACTTCTTCAAGTCCGCCATGCCGGAAGGCTATGTGCAGGAACGCACGATTTCTTTAAG<br>GATGACGGCACGTACAAAACGCGTGCGGAAGTAAAATTTGAAGGCGATACCCTGGTAAAC<br>CGCATTGAGCTGAAAGGCATTGACTTTAAAGAAGACGGCAATATCCTGGGCCATAAGCTG<br>GAATACAATTTTAAACAGCCACAATGTTTACATCACCGCCGATAAACAATAAATGGCATT<br>AAGCGAATTTTAAATTCGCCACAACGTGGAGGATGGCAGCGTGCAGCTGGCTGATCACT<br>ACCAGCAAAACACTCCAATCGGTGATGGTCTGTTCTGCTGCCAGACAATCACTATCTGAG<br>CACGCAAAGCGTTCTGTCTAAAGATCCGAACGAGAAACGCGATCATATGGTTCTGCTGGA<br>GTTCGTAACCGCAGCGGGCATCACGCATGGTATGGATGAACTGTACAAATGATGA |
| 5' overhang | GAACGGTCTCAGCAT                                                                                                                                                                                                                                                                                                                                                                                                                                                                                                                                                                                                                                                                                                                                                                          |
| 3' overhang | GTCGTGAGACCTTACG                                                                                                                                                                                                                                                                                                                                                                                                                                                                                                                                                                                                                                                                                                                                                                         |

Table 3: Sequences for the parts used in the reporter cassette.

| Malathion reporter                      | Locus tag  | Time point (hours) |
|-----------------------------------------|------------|--------------------|
| atpB                                    | PFLU_6124  | 1.0                |
| petA                                    | PFLU_0841  | 2.0                |
| anti-sigma 28 factor                    | PFLU_4736  | 3.2                |
| sucC                                    | PFLU_1823  | 8.1                |
| Uncharacterized protein I               | PFLU_3761  | 12.9               |
| rpoA                                    | PFLU_5502  | 15.0               |
| fabA                                    | PFLU_1836  | 14.0               |
| Putative ABC transport protein          | PFLU_0376  | 0.9                |
| gltA                                    | PFLU_1815  | 3.2                |
| lpxC                                    | PFLU_0953  | 0.7                |
| acrA                                    | PFLU_1380  | 3.1                |
| Putative outer membrane porin A protein | PFLU_4612  | 2.0                |
| cspA2                                   | PFLU_4150  | 2.4                |
| capB                                    | PFLU_1302A | 8.5                |
| Uncharacterized protein II              | PFLU_1358  | 5.6                |

Table 4: The time points at which the Hill functions are fit to each reporters' response.
